# Supplementary material for: Strategy to enhance solid-state fluorescence and aggregation-induced emission enhancement effect in pyrimidine boron complexes
Source: Royal Society of Chemistry journal article supplement (doi:10.1039/c4dt03318c), 2015-01-01
Supplement: c4dt03318c1.pdf [file c4dt03318c1.pdf]

## Electronic supplementary information

# Strategy to Enhance Solid-State Fluorescence and Aggregation-Induced Emission Enhancement Effect in Pyrimidine Boron Complexes

Yasuhiro Kubota,\* Kouhei Kasatani, Hiroki Takai, Kazumasa Funabiki and Masaki Matsui\*

*Department of Chemistry and Biomolecular Science, Faculty of Engineering, Gifu University, 1-1 Yanagido, Gifu 501-1193, Japan*

kubota@gifu-u.ac.jp (Y. Kubota), matsui@gifu-u.ac.jp (M. Matsui)

## Contents

1. UV-vis absorption and fluorescence spectra (Figure S1–S6)
2. AIEE check (Figure S7–S12)
3. UV-vis absorption and fluorescence properties (Table S1–S6)
4. X ray crystal data (Table S7–S36)
5. Cartesian coordinates of the optimized structures
6. <sup>1</sup>H and <sup>13</sup>C NMR spectra (Figure S13–Figure S30)

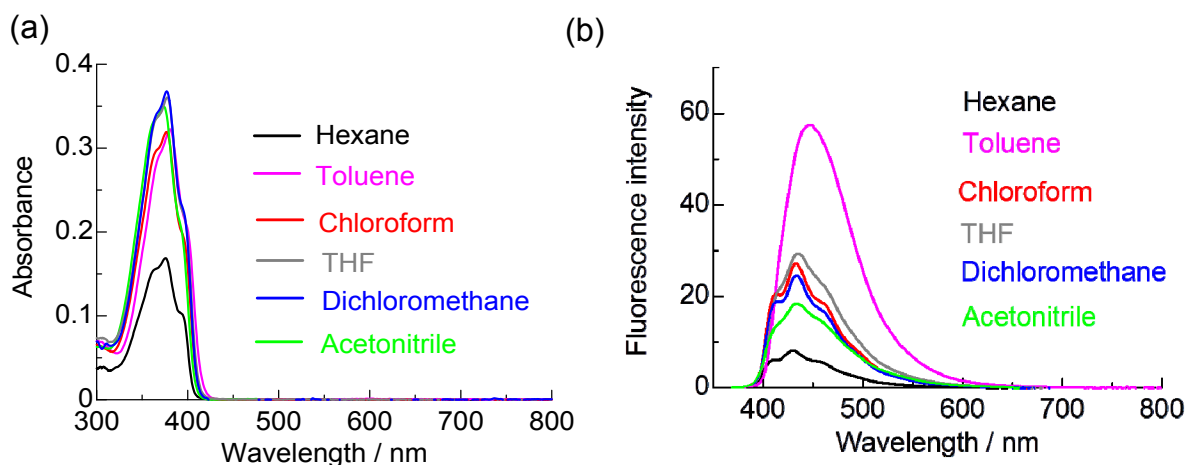

**Figure S1.** (a) UV-vis absorption and (b) fluorescence spectra of **8** in various solvents ( $1.0 \times 10^{-5}$  M).

The solubility of **8** in *n*-hexane was poor.

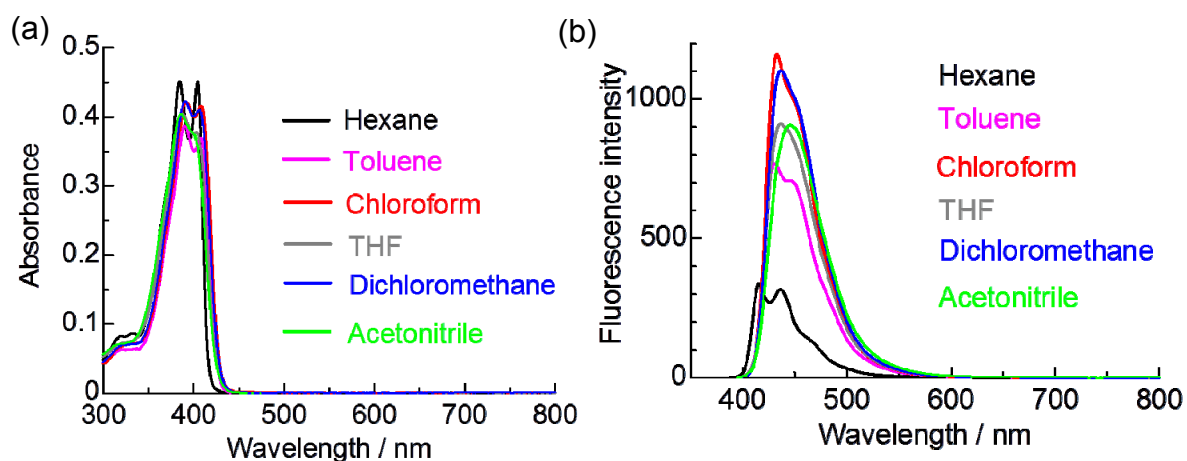

**Figure S2.** (a) UV-vis absorption and (b) fluorescence spectra of **9** in various solvents ( $1.0 \times 10^{-5}$  M).

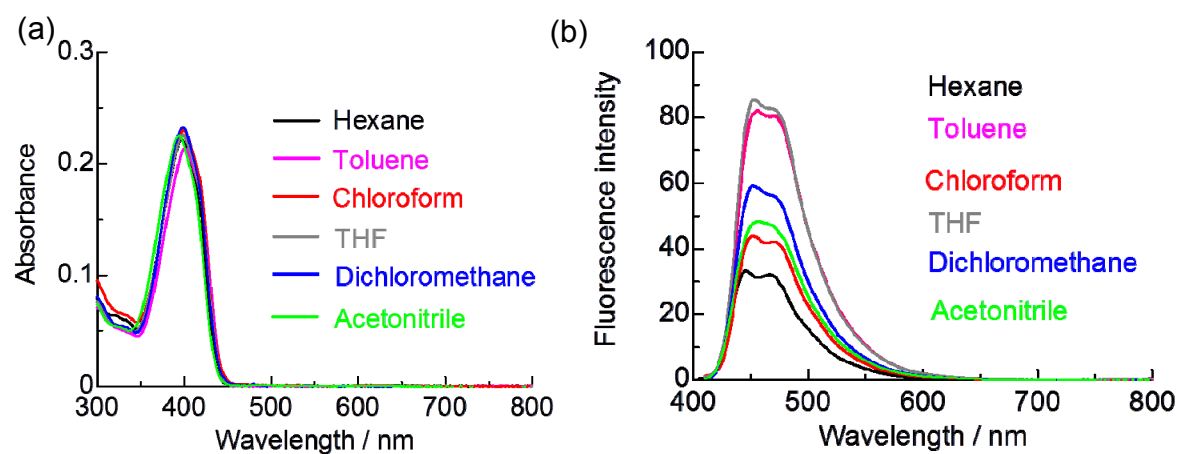

**Figure S3.** (a) UV-vis absorption and (b) fluorescence spectra of **11** in various solvents ( $1.0 \times 10^{-5}$  M).

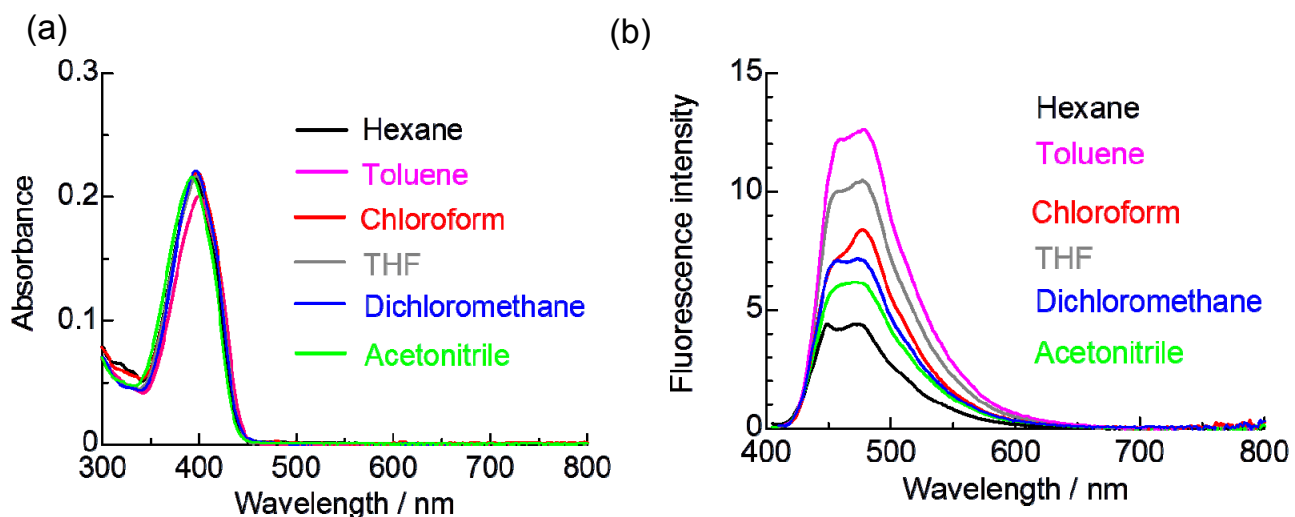

**Figure S4.** (a) UV-vis absorption and (b) fluorescence spectra of **12** in various solvents ( $1.0 \times 10^{-5}$  M).

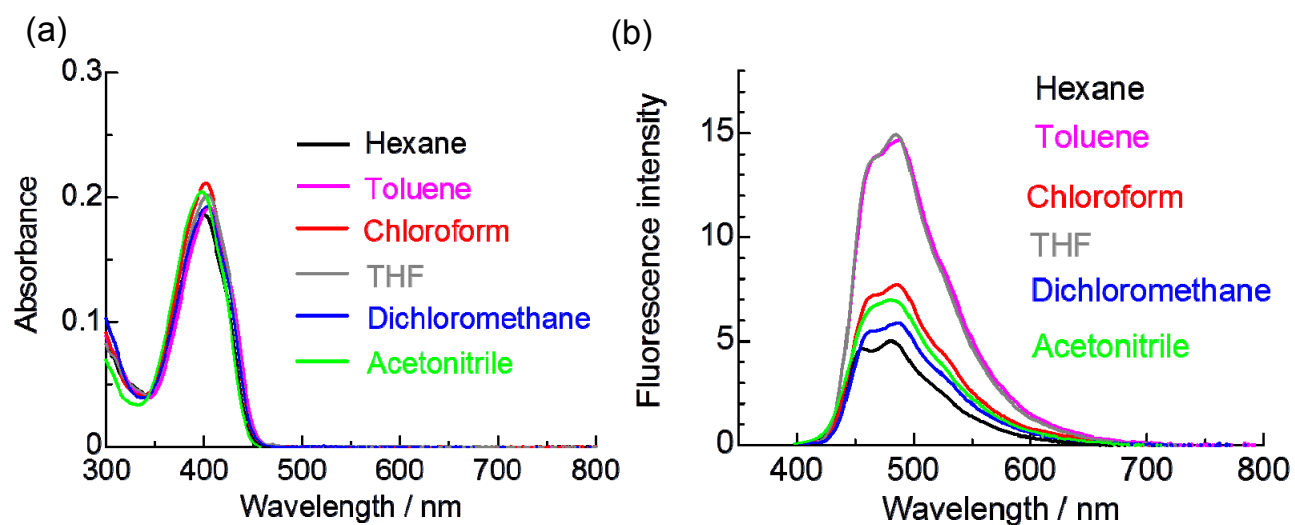

**Figure S5.** (a) UV-vis absorption and (b) fluorescence spectra of **13** in various solvents ( $1.0 \times 10^{-5}$  M).

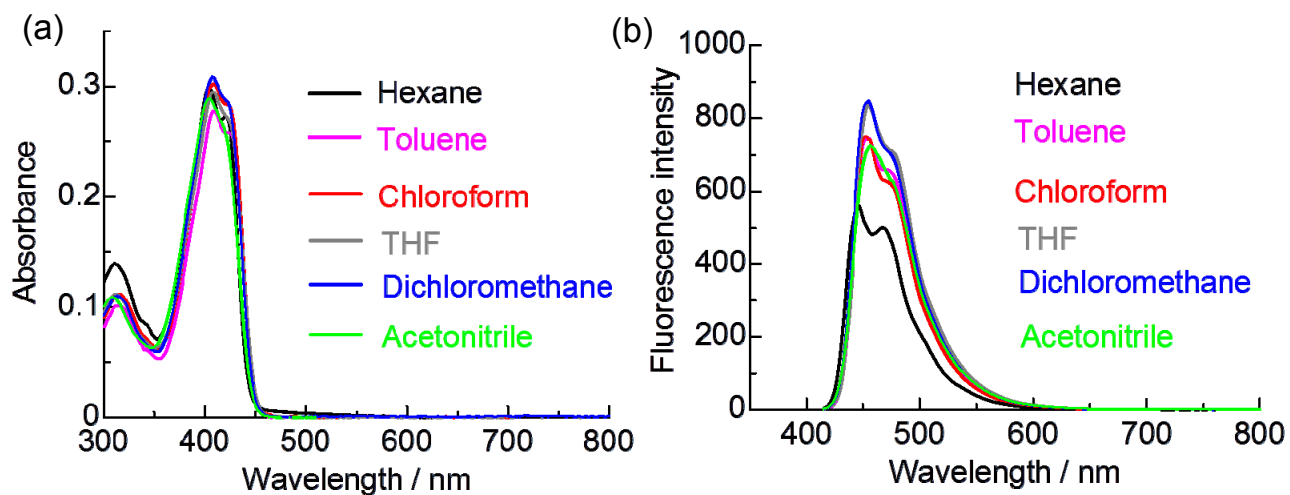

**Figure S6.** (a) UV-vis absorption and (b) fluorescence spectra of **14** in various solvents ( $1.0 \times 10^{-5}$  M).

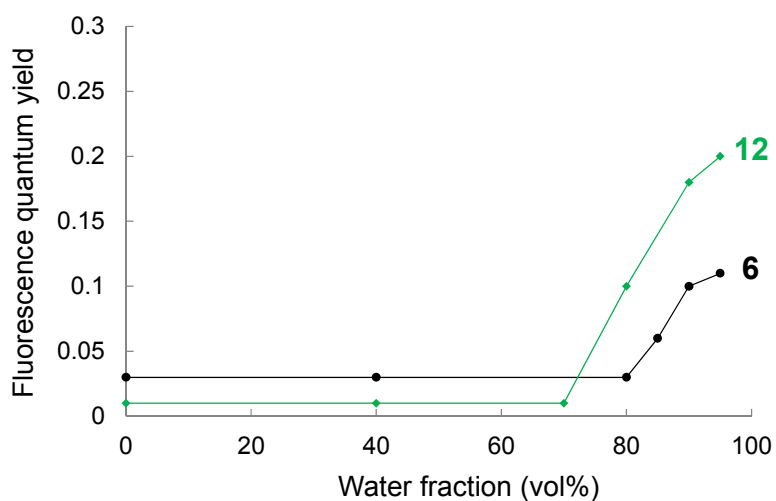

**Figure S7.** Fluorescence quantum yields of **6** and **12** in THF–water mixtures with different volume fractions of water ( $10^{-4}$  M).

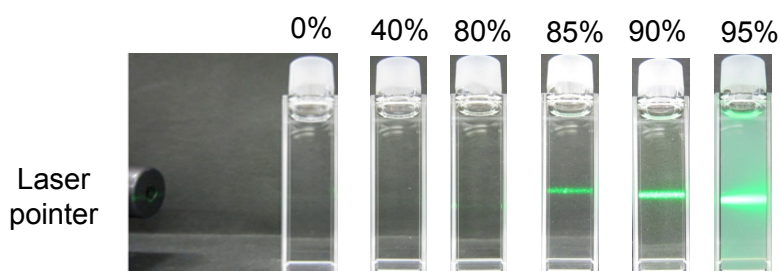

**Figure S8.** Check of Tyndall phenomenon of **6**.

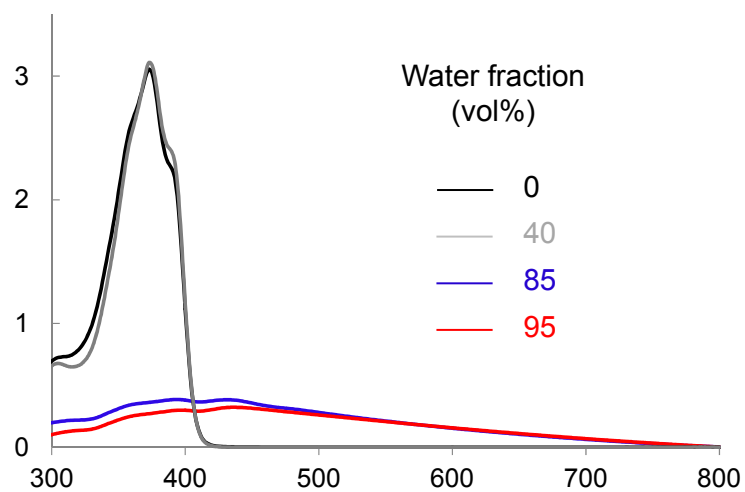

**Figure S9.** UV-vis absorption spectra of **6** in THF–water mixtures with different volume fractions of water ( $10^{-4}$  M).

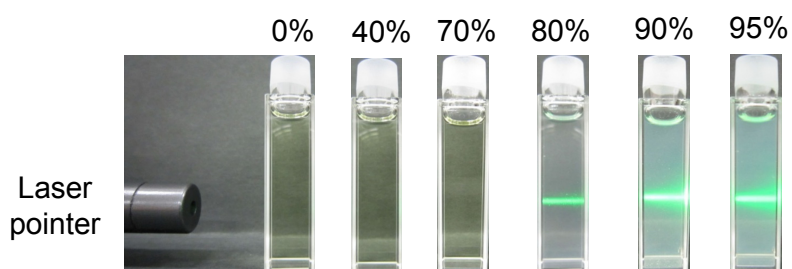

**Figure S10.** Check of Tyndall phenomenon of **12**.

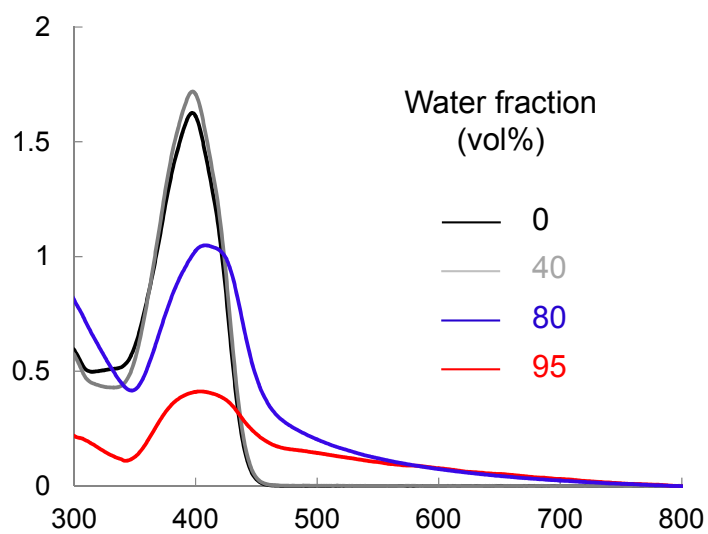

**Figure S11.** UV-vis absorption spectra of **12** in THF–water mixtures with different volume fractions of water ( $10^{-4}$  M).

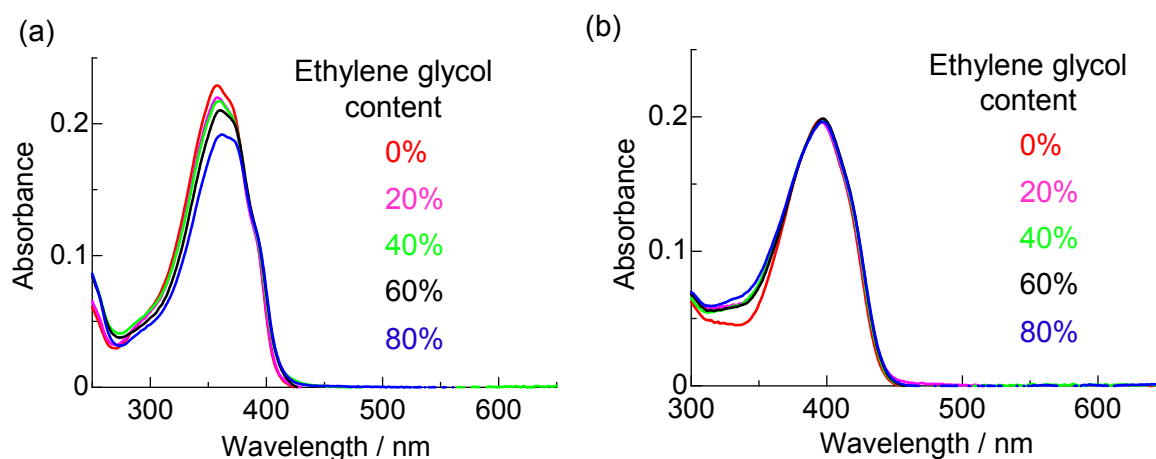

**Figure S12.** UV-vis absorption spectra of (a) **6** and (b) **12** in methanol–ethylene glycol mixtures with different volume fractions of ethylene glycol.

**Table S1.** Absorption and fluorescence properties of **8** in various solvents<sup>a</sup>

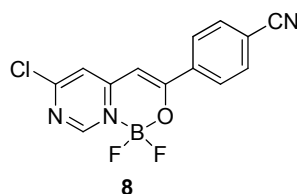

| solvent                  | $\lambda_{\max}$ ( $\epsilon$ )<br>(nm) | $F_{\max}^b$<br>(nm) | Stokes shift<br>( $\text{cm}^{-1}$ ) | $\phi_f^c$ | $\tau_s^d$<br>(ns) | $k_f^e$<br>( $10^9 \text{ s}^{-1}$ ) | $k_{nr}^f$<br>( $10^9 \text{ s}^{-1}$ ) |
|--------------------------|-----------------------------------------|----------------------|--------------------------------------|------------|--------------------|--------------------------------------|-----------------------------------------|
| Hexane                   | 376, 392 <sup>g</sup>                   | 411, 430             | 3,340                                | < 0.01     | — <sup>h</sup>     | —                                    | —                                       |
| Toluene                  | 381 (32,200)<br>398 (21,100)            | 446                  | 3,830                                | 0.01       | — <sup>h</sup>     | —                                    | —                                       |
| $\text{CHCl}_3$          | 378 (31,900)<br>395 (20,100)            | 413, 433             | 3,360                                | 0.01       | — <sup>h</sup>     | —                                    | —                                       |
| THF                      | 378 (36,000)<br>395 (22,400)            | 435                  | 3,470                                | 0.01       | — <sup>h</sup>     | —                                    | —                                       |
| $\text{CH}_2\text{Cl}_2$ | 377 (36,800)<br>393 (23,300)            | 414, 433             | 3,430                                | 0.01       | — <sup>h</sup>     | —                                    | —                                       |
| MeCN                     | 374 (35,000)<br>391 (21,300)            | 434                  | 3,700                                | 0.01       | — <sup>h</sup>     | —                                    | —                                       |

<sup>a</sup>Measured at a concentration of  $1.0 \times 10^{-5} \text{ mol dm}^{-3}$ . <sup>b</sup>The excitation wavelengths ( $\lambda_{\text{ex}}$ ) were as follows: hexane (371 nm), toluene (381 nm), chloroform (378 nm), THF (378 nm), dichloromethane (378 nm) and acetonitrile (354 nm). <sup>c</sup>Measured using an integrating sphere method. <sup>d</sup>Measured using a single-photon-counting method. <sup>e</sup>Radiative rate constant ( $k_f = \Phi_f/\tau_s$ ). <sup>f</sup>Non-radiative rate constant ( $k_{nr} = (1 - \Phi_f)/\tau_s$ ). <sup>g</sup>Poor solubility. <sup>h</sup>Too short to be measured ( $\tau_s < 0.1 \text{ ns}$ ).

**Table S2.** Absorption and fluorescence properties of **9** in various solvents<sup>a</sup>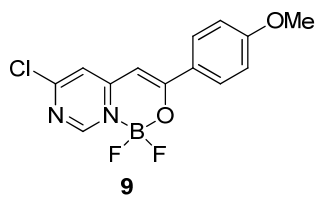

| solvent                  | $\lambda_{\max}$ ( $\epsilon$ )<br>(nm) | $F_{\max}^b$<br>(nm) | Stokes shift<br>( $\text{cm}^{-1}$ ) | $\phi_f^c$ | $\tau_s^d$<br>(ns) | $k_f^e$<br>( $10^9 \text{ s}^{-1}$ ) | $k_{\text{nr}}^f$<br>( $10^9 \text{ s}^{-1}$ ) |
|--------------------------|-----------------------------------------|----------------------|--------------------------------------|------------|--------------------|--------------------------------------|------------------------------------------------|
| Hexane                   | 385 (45,200)<br>405 (45,100)            | 415, 436             | 1,880                                | 0.14       | 0.38               | 0.37                                 | 2.26                                           |
| Toluene                  | 390 (38,700)<br>408 (37,000)            | 431, 445             | 2,440                                | 0.44       | 1.16               | 0.38                                 | 0.48                                           |
| $\text{CHCl}_3$          | 392 (42,200)<br>408 (41,600)            | 433                  | 2,420                                | 0.53       | 1.38               | 0.38                                 | 0.34                                           |
| THF                      | 388 (40,400)<br>403 (37,700)            | 436                  | 2,840                                | 0.43       | 1.32               | 0.33                                 | 0.43                                           |
| $\text{CH}_2\text{Cl}_2$ | 391 (42,200)<br>407 (41,000)            | 437                  | 2,690                                | 0.52       | 1.37               | 0.38                                 | 0.35                                           |
| MeCN                     | 386 (40,300)<br>399 (37,800)            | 445                  | 3,440                                | 0.44       | 1.34               | 0.33                                 | 0.42                                           |

<sup>a</sup>Measured at a concentration of  $1.0 \times 10^{-5} \text{ mol dm}^{-3}$ . <sup>b</sup>The excitation wavelengths ( $\lambda_{\text{ex}}$ ) were as follows: hexane (390 nm), toluene (390 nm), chloroform (390 nm), THF (390 nm), dichloromethane (390 nm) and acetonitrile (390 nm). <sup>c</sup>Measured using an integrating sphere method. <sup>d</sup>Measured using a single-photon-counting method. <sup>e</sup>Radiative rate constant ( $k_f = \Phi_f/\tau_s$ ). <sup>f</sup>Non-radiative rate constant ( $k_{\text{nr}} = (1 - \Phi_f)/\tau_s$ ).

**Table S3.** Absorption and fluorescence properties of **11** in various solvents<sup>a</sup>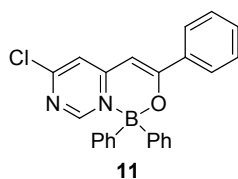

| solvent                         | $\lambda_{\max}$ ( $\epsilon$ )<br>(nm) | $F_{\max}$ <sup>b</sup><br>(nm) | Stokes shift<br>(cm <sup>-1</sup> ) | $\phi_f$ <sup>c</sup> | $\tau_s$ <sup>d</sup><br>(ns) | $k_f$ <sup>e</sup><br>(10 <sup>9</sup> s <sup>-1</sup> ) | $k_{nr}$ <sup>f</sup><br>(10 <sup>9</sup> s <sup>-1</sup> ) |
|---------------------------------|-----------------------------------------|---------------------------------|-------------------------------------|-----------------------|-------------------------------|----------------------------------------------------------|-------------------------------------------------------------|
| Hexane                          | 397 (22,200)                            | 445, 466                        | 2,720                               | 0.03                  | 0.41                          | 0.07                                                     | 2.37                                                        |
| Toluene                         | 401 (21,400)                            | 456, 470                        | 3,010                               | 0.10                  | 1.03                          | 0.10                                                     | 0.87                                                        |
| CHCl <sub>3</sub>               | 399 (23,000)                            | 451, 470                        | 2,890                               | 0.05                  | 0.65                          | 0.08                                                     | 1.46                                                        |
| THF                             | 399 (22,600)                            | 452, 467                        | 2,940                               | 0.08                  | 0.91                          | 0.09                                                     | 1.01                                                        |
| CH <sub>2</sub> Cl <sub>2</sub> | 398 (23,300)                            | 452, 469                        | 3,000                               | 0.05                  | 0.67                          | 0.07                                                     | 1.42                                                        |
| MeCN                            | 395 (22,500)                            | 456                             | 3,390                               | 0.04                  | 0.62                          | 0.06                                                     | 1.55                                                        |

<sup>a</sup>Measured at a concentration of  $1.0 \times 10^{-5}$  mol dm<sup>-3</sup>. <sup>b</sup>The excitation wavelengths ( $\lambda_{\text{ex}}$ ) were as follows: hexane (397 nm), toluene (401 nm), chloroform (400 nm), THF (399 nm), dichloromethane (400 nm) and acetonitrile (396 nm). <sup>c</sup>Measured using an integrating sphere method. <sup>d</sup>Measured using a single-photon-counting method. <sup>e</sup>Radiative rate constant ( $k_f = \Phi_f/\tau_s$ ). <sup>f</sup>Non-radiative rate constant ( $k_{nr} = (1 - \Phi_f)/\tau_s$ ).



**Table S4.** Absorption and fluorescence properties of **12** in various solvents<sup>a</sup>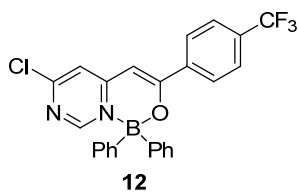

| solvent                         | $\lambda_{\max}$ ( $\epsilon$ )<br>(nm) | $F_{\max}$ <sup>b</sup><br>(nm) | Stokes shift<br>(cm <sup>-1</sup> ) | $\phi_f$ <sup>c</sup> | $\tau_s$ <sup>d</sup><br>(ns) | $k_f$ <sup>e</sup><br>(10 <sup>9</sup> s <sup>-1</sup> ) | $k_{nr}$ <sup>f</sup><br>(10 <sup>9</sup> s <sup>-1</sup> ) |
|---------------------------------|-----------------------------------------|---------------------------------|-------------------------------------|-----------------------|-------------------------------|----------------------------------------------------------|-------------------------------------------------------------|
| Hexane                          | 396 (21,500)                            | 449, 474                        | 4,160                               | <0.01                 | ___ <sup>g</sup>              | ___ <sup>g</sup>                                         | ___ <sup>g</sup>                                            |
| Toluene                         | 400 (20,000)                            | 459, 477                        | 4,040                               | 0.02                  | 0.40                          | 0.05                                                     | 2.45                                                        |
| CHCl <sub>3</sub>               | 397 (21,900)                            | 455, 477                        | 4,230                               | 0.01                  | 0.37                          | 0.03                                                     | 2.68                                                        |
| THF                             | 397 (21,600)                            | 459, 477                        | 4,230                               | 0.01                  | 0.33                          | 0.03                                                     | 3.00                                                        |
| CH <sub>2</sub> Cl <sub>2</sub> | 397 (22,100)                            | 457, 473                        | 4,230                               | 0.01                  | 0.30                          | 0.03                                                     | 3.30                                                        |
| MeCN                            | 393 (21,600)                            | 469                             | 4,120                               | 0.01                  | 0.30                          | 0.03                                                     | 3.30                                                        |

<sup>a</sup>Measured at a concentration of  $1.0 \times 10^{-5}$  mol dm<sup>-3</sup>. <sup>b</sup>The excitation wavelengths ( $\lambda_{\text{ex}}$ ) were as follows: hexane (397 nm), toluene (401 nm), chloroform (406 nm), THF (399 nm), dichloromethane (399 nm) and acetonitrile (396 nm). <sup>c</sup>Measured using an integrating sphere method. <sup>d</sup>Measured using a single-photon-counting method. <sup>e</sup>Radiative rate constant ( $k_f = \Phi_f/\tau_s$ ). <sup>f</sup>Non-radiative rate constant ( $k_{nr} = (1 - \Phi_f)/\tau_s$ ). <sup>g</sup>Too short to be measured ( $\tau_s < 0.1$  ns).

**Table S5.** Absorption and fluorescence properties of **13** in various solvents<sup>a</sup>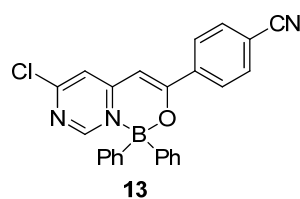

| solvent                  | $\lambda_{\max}$ ( $\epsilon$ )<br>(nm) | $F_{\max}^b$<br>(nm) | Stokes shift<br>( $\text{cm}^{-1}$ ) | $\phi_f^c$ | $\tau_s^d$<br>(ns) | $k_f^e$<br>( $10^9 \text{ s}^{-1}$ ) | $k_{\text{nr}}^f$<br>( $10^9 \text{ s}^{-1}$ ) |
|--------------------------|-----------------------------------------|----------------------|--------------------------------------|------------|--------------------|--------------------------------------|------------------------------------------------|
| Hexane                   | 401 (18,600)                            | 456, 480             | 4,100                                | <0.01      | — <sup>h</sup>     | —                                    | —                                              |
| Toluene                  | 405 (19,200)                            | 489                  | 4,240                                | 0.01       | — <sup>h</sup>     | —                                    | —                                              |
| $\text{CHCl}_3$          | 404 (20,200)                            | 486                  | 4,180                                | <0.01      | — <sup>h</sup>     | —                                    | —                                              |
| THF                      | 404 (19,300)                            | 485                  | 4,130                                | 0.01       | — <sup>h</sup>     | —                                    | —                                              |
| $\text{CH}_2\text{Cl}_2$ | 403 (20,000)                            | 466, 486             | 4,240                                | <0.01      | — <sup>h</sup>     | —                                    | —                                              |
| MeCN                     | 398 (20,500)                            | 480                  | 4,290                                | <0.01      | — <sup>h</sup>     | —                                    | —                                              |

<sup>a</sup>Measured at a concentration of  $1.0 \times 10^{-5} \text{ mol dm}^{-3}$ . <sup>b</sup>The excitation wavelengths ( $\lambda_{\text{ex}}$ ) were as follows: hexane (401 nm), toluene (405 nm), chloroform (400 nm), THF (404 nm), dichloromethane (404 nm) and acetonitrile (381 nm). <sup>c</sup>Measured using an integrating sphere method. <sup>d</sup>Measured using a single-photon-counting method. <sup>e</sup>Radiative rate constant ( $k_f = \Phi_f/\tau_s$ ). <sup>f</sup>Non-radiative rate constant ( $k_{\text{nr}} = (1 - \Phi_f)/\tau_s$ ).

**Table S6.** Absorption and fluorescence properties of **14** in various solvents<sup>a</sup>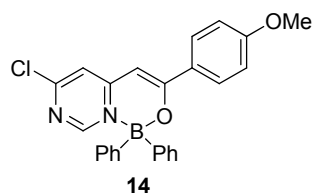

| solvent                  | $\lambda_{\max}$ ( $\epsilon$ )<br>(nm) | $F_{\max}^b$<br>(nm) | Stokes shift<br>( $\text{cm}^{-1}$ ) | $\phi_f^c$ | $\tau_s^d$<br>(ns) | $k_f^e$<br>( $10^9 \text{ s}^{-1}$ ) | $k_{\text{nr}}^f$<br>( $10^9 \text{ s}^{-1}$ ) |
|--------------------------|-----------------------------------------|----------------------|--------------------------------------|------------|--------------------|--------------------------------------|------------------------------------------------|
| Hexane                   | 404 (29,800)                            | 445, 468             | 2,280                                | 0.35       | 1.89               | 0.19                                 | 0.34                                           |
|                          | 421 (27,300)                            |                      |                                      |            |                    |                                      |                                                |
| Toluene                  | 409 (27,800)                            | 456, 469             | 2,520                                | 0.58       | 2.70               | 0.22                                 | 0.16                                           |
|                          | 425 (25,800)                            |                      |                                      |            |                    |                                      |                                                |
| $\text{CHCl}_3$          | 408 (30,300)                            | 453, 469             | 2,440                                | 0.48       | 2.30               | 0.21                                 | 0.23                                           |
|                          | 422 (28,400)                            |                      |                                      |            |                    |                                      |                                                |
| THF                      | 409(29,400)                             | 455                  | 2,470                                | 0.53       | 2.76               | 0.19                                 | 0.17                                           |
| $\text{CH}_2\text{Cl}_2$ | 408 (30,900)                            | 455, 474             | 2,530                                | 0.53       | 2.49               | 0.21                                 | 0.19                                           |
| MeCN                     | 404 (28,900)                            | 457                  | 2,870                                | 0.46       | 2.51               | 0.18                                 | 0.22                                           |

<sup>a</sup>Measured at a concentration of  $1.0 \times 10^{-5} \text{ mol dm}^{-3}$ . <sup>b</sup> The excitation wavelengths ( $\lambda_{\text{ex}}$ ) were as follows: hexane (409 nm), toluene (409 nm), 1,4-dioxane (409 nm), chloroform (409 nm), THF (409 nm), dichloromethane (409 nm) and acetonitrile (409 nm). <sup>c</sup>Measured using an integrating sphere method. <sup>d</sup>Measured using a single-photon-counting method. <sup>e</sup>Radiative rate constant ( $k_f = \Phi_f/\tau_s$ ). <sup>f</sup>Non-radiative rate constant ( $k_{\text{nr}} = (1 - \Phi_f)/\tau_s$ ).

**Table S7.** Crystal data and structure refinement for **11**.

|                      |                                                                      |                              |
|----------------------|----------------------------------------------------------------------|------------------------------|
| Identification code  | 11                                                                   |                              |
| Empirical formula    | $\text{C}_{24} \text{H}_{18} \text{B} \text{Cl} \text{N}_2 \text{O}$ |                              |
| Formula weight       | 396.66                                                               |                              |
| Temperature          | 293(2) K                                                             |                              |
| Wavelength           | 0.71075 Å                                                            |                              |
| Crystal system       | Monoclinic                                                           |                              |
| Space group          | P 21/c                                                               |                              |
| Unit cell dimensions | $a = 9.467(3) \text{ Å}$                                             | $\alpha = 90^\circ$ .        |
|                      | $b = 20.563(7) \text{ Å}$                                            | $\beta = 96.812(10)^\circ$ . |
|                      | $c = 10.445(3) \text{ Å}$                                            | $\gamma = 90^\circ$ .        |
| Volume               | 2019.0(11) Å <sup>3</sup>                                            |                              |
| Z                    | 4                                                                    |                              |
| Density (calculated) | 1.305 Mg/m <sup>3</sup>                                              |                              |

|                                   |                                             |
|-----------------------------------|---------------------------------------------|
| Absorption coefficient            | 0.207 mm <sup>-1</sup>                      |
| F(000)                            | 824                                         |
| Crystal size                      | 0.20 x 0.20 x 0.20 mm <sup>3</sup>          |
| Theta range for data collection   | 2.17 to 27.58°.                             |
| Index ranges                      | -12<=h<=12, -26<=k<=26, -13<=l<=13          |
| Reflections collected             | 19713                                       |
| Independent reflections           | 4594 [R(int) = 0.0825]                      |
| Completeness to theta = 27.58°    | 98.1 %                                      |
| Absorption correction             | Integration                                 |
| Max. and min. transmission        | 0.9598 and 0.9598                           |
| Refinement method                 | Full-matrix least-squares on F <sup>2</sup> |
| Data / restraints / parameters    | 4594 / 0 / 262                              |
| Goodness-of-fit on F <sup>2</sup> | 1.026                                       |
| Final R indices [I>2sigma(I)]     | R1 = 0.0501, wR2 = 0.1300                   |
| R indices (all data)              | R1 = 0.0618, wR2 = 0.1408                   |
| Largest diff. peak and hole       | 0.192 and -0.237 e.Å <sup>-3</sup>          |

**Table S8.** Atomic coordinates ( x 10<sup>4</sup>) and equivalent isotropic displacement parameters (Å<sup>2</sup>x 10<sup>3</sup>) for **11**. U(eq) is defined as one third of the trace of the orthogonalized U<sup>ij</sup> tensor.

|       | x       | y        | z        | U(eq) |
|-------|---------|----------|----------|-------|
| C(1)  | 4892(2) | -640(1)  | 7645(2)  | 43(1) |
| C(2)  | 4466(2) | -165(1)  | 6767(2)  | 48(1) |
| C(3)  | 3309(2) | -263(1)  | 5803(2)  | 42(1) |
| C(4)  | 2655(2) | 240(1)   | 5040(2)  | 50(1) |
| C(5)  | 1637(2) | -965(1)  | 4737(2)  | 49(1) |
| C(6)  | 5972(2) | -556(1)  | 8768(2)  | 48(1) |
| C(7)  | 6380(2) | -1090(1) | 9533(2)  | 70(1) |
| C(8)  | 7412(3) | -1033(1) | 10569(3) | 92(1) |
| C(9)  | 8057(3) | -443(1)  | 10871(2) | 86(1) |
| C(10) | 7660(3) | 80(1)    | 10133(3) | 90(1) |
| C(11) | 6623(3) | 37(1)    | 9086(2)  | 73(1) |
| C(12) | 1552(2) | 79(1)    | 4144(2)  | 49(1) |
| C(13) | 4856(2) | -1677(1) | 5380(2)  | 44(1) |
| C(14) | 6230(2) | -1850(1) | 5909(2)  | 50(1) |
| C(15) | 7262(2) | -2044(1) | 5145(2)  | 60(1) |

|       |         |          |         |       |
|-------|---------|----------|---------|-------|
| C(16) | 6950(2) | -2067(1) | 3829(2) | 65(1) |
| C(17) | 5613(2) | -1901(1) | 3272(2) | 65(1) |
| C(18) | 4586(2) | -1708(1) | 4039(2) | 55(1) |
| C(19) | 2558(2) | -2051(1) | 6591(2) | 44(1) |
| C(20) | 2460(2) | -2645(1) | 5955(2) | 59(1) |
| C(21) | 1478(3) | -3116(1) | 6261(2) | 74(1) |
| C(22) | 599(2)  | -3001(1) | 7183(2) | 69(1) |
| C(23) | 677(2)  | -2423(1) | 7833(2) | 65(1) |
| C(24) | 1646(2) | -1956(1) | 7530(2) | 53(1) |
| B(1)  | 3651(2) | -1482(1) | 6293(2) | 41(1) |
| N(1)  | 2768(1) | -878(1)  | 5606(1) | 41(1) |
| N(2)  | 995(2)  | -518(1)  | 3979(1) | 53(1) |
| O(1)  | 4306(1) | -1225(1) | 7560(1) | 46(1) |
| Cl(1) | 754(1)  | 671(1)   | 3133(1) | 69(1) |

---

**Table S9.** Bond lengths [Å] and angles [°] for **11**.

---

|             |            |
|-------------|------------|
| C(1)-O(1)   | 1.3244(18) |
| C(1)-C(2)   | 1.366(2)   |
| C(1)-C(6)   | 1.472(2)   |
| C(2)-C(3)   | 1.412(2)   |
| C(3)-N(1)   | 1.3705(19) |
| C(3)-C(4)   | 1.404(2)   |
| C(4)-C(12)  | 1.358(2)   |
| C(5)-N(2)   | 1.315(2)   |
| C(5)-N(1)   | 1.331(2)   |
| C(6)-C(7)   | 1.385(3)   |
| C(6)-C(11)  | 1.388(2)   |
| C(7)-C(8)   | 1.374(3)   |
| C(8)-C(9)   | 1.378(4)   |
| C(9)-C(10)  | 1.350(4)   |
| C(10)-C(11) | 1.383(3)   |
| C(12)-N(2)  | 1.339(2)   |
| C(12)-Cl(1) | 1.7247(17) |
| C(13)-C(18) | 1.395(2)   |
| C(13)-C(14) | 1.397(2)   |
| C(13)-B(1)  | 1.622(2)   |
| C(14)-C(15) | 1.391(3)   |

|             |          |
|-------------|----------|
| C(15)-C(16) | 1.372(3) |
| C(16)-C(17) | 1.372(3) |
| C(17)-C(18) | 1.389(3) |
| C(19)-C(20) | 1.388(2) |
| C(19)-C(24) | 1.395(2) |
| C(19)-B(1)  | 1.616(2) |
| C(20)-C(21) | 1.405(3) |
| C(21)-C(22) | 1.367(3) |
| C(22)-C(23) | 1.368(3) |
| C(23)-C(24) | 1.390(2) |
| B(1)-O(1)   | 1.490(2) |
| B(1)-N(1)   | 1.616(2) |

|                   |            |
|-------------------|------------|
| O(1)-C(1)-C(2)    | 121.11(14) |
| O(1)-C(1)-C(6)    | 113.89(13) |
| C(2)-C(1)-C(6)    | 124.97(14) |
| C(1)-C(2)-C(3)    | 121.25(14) |
| N(1)-C(3)-C(4)    | 117.55(14) |
| N(1)-C(3)-C(2)    | 118.92(13) |
| C(4)-C(3)-C(2)    | 123.52(14) |
| C(12)-C(4)-C(3)   | 117.58(15) |
| N(2)-C(5)-N(1)    | 126.40(15) |
| C(7)-C(6)-C(11)   | 118.18(18) |
| C(7)-C(6)-C(1)    | 119.14(15) |
| C(11)-C(6)-C(1)   | 122.67(16) |
| C(8)-C(7)-C(6)    | 120.7(2)   |
| C(7)-C(8)-C(9)    | 120.6(2)   |
| C(10)-C(9)-C(8)   | 119.0(2)   |
| C(9)-C(10)-C(11)  | 121.6(2)   |
| C(10)-C(11)-C(6)  | 119.9(2)   |
| N(2)-C(12)-C(4)   | 124.82(15) |
| N(2)-C(12)-Cl(1)  | 115.49(13) |
| C(4)-C(12)-Cl(1)  | 119.68(13) |
| C(18)-C(13)-C(14) | 115.90(15) |
| C(18)-C(13)-B(1)  | 122.95(14) |
| C(14)-C(13)-B(1)  | 121.11(15) |
| C(15)-C(14)-C(13) | 122.01(17) |
| C(16)-C(15)-C(14) | 120.12(17) |
| C(17)-C(16)-C(15) | 119.62(17) |
| C(16)-C(17)-C(18) | 120.03(19) |

|                   |            |
|-------------------|------------|
| C(17)-C(18)-C(13) | 122.30(17) |
| C(20)-C(19)-C(24) | 116.57(15) |
| C(20)-C(19)-B(1)  | 123.59(16) |
| C(24)-C(19)-B(1)  | 119.84(14) |
| C(19)-C(20)-C(21) | 120.4(2)   |
| C(22)-C(21)-C(20) | 121.08(19) |
| C(21)-C(22)-C(23) | 119.88(18) |
| C(22)-C(23)-C(24) | 119.1(2)   |
| C(23)-C(24)-C(19) | 122.96(18) |
| O(1)-B(1)-C(19)   | 107.11(13) |
| O(1)-B(1)-N(1)    | 105.16(11) |
| C(19)-B(1)-N(1)   | 109.42(12) |
| O(1)-B(1)-C(13)   | 111.25(13) |
| C(19)-B(1)-C(13)  | 116.37(13) |
| N(1)-B(1)-C(13)   | 106.97(12) |
| C(5)-N(1)-C(3)    | 118.88(13) |
| C(5)-N(1)-B(1)    | 122.07(12) |
| C(3)-N(1)-B(1)    | 118.52(12) |
| C(5)-N(2)-C(12)   | 114.63(15) |
| C(1)-O(1)-B(1)    | 120.54(12) |

---

Symmetry transformations used to generate equivalent atoms:

**Table S10.** Anisotropic displacement parameters ( $\text{\AA}^2 \times 10^3$ ) for **11**. The anisotropic displacement factor exponent takes the form:  $-2\pi^2 [ h^2 a^{*2} U^{11} + \dots + 2 h k a^* b^* U^{12} ]$

|       | U <sup>11</sup> | U <sup>22</sup> | U <sup>33</sup> | U <sup>23</sup> | U <sup>13</sup> | U <sup>12</sup> |
|-------|-----------------|-----------------|-----------------|-----------------|-----------------|-----------------|
| C(1)  | 40(1)           | 41(1)           | 48(1)           | -5(1)           | 6(1)            | -3(1)           |
| C(2)  | 45(1)           | 40(1)           | 59(1)           | -2(1)           | 4(1)            | -6(1)           |
| C(3)  | 39(1)           | 38(1)           | 51(1)           | 1(1)            | 11(1)           | 2(1)            |
| C(4)  | 47(1)           | 40(1)           | 63(1)           | 7(1)            | 7(1)            | 4(1)            |
| C(5)  | 46(1)           | 44(1)           | 56(1)           | 1(1)            | 1(1)            | 2(1)            |
| C(6)  | 44(1)           | 51(1)           | 49(1)           | -6(1)           | 4(1)            | -4(1)           |
| C(7)  | 68(1)           | 62(1)           | 75(1)           | 8(1)            | -19(1)          | -11(1)          |
| C(8)  | 90(2)           | 86(2)           | 87(2)           | 15(1)           | -36(1)          | -12(1)          |
| C(9)  | 82(2)           | 96(2)           | 72(1)           | -5(1)           | -26(1)          | -21(1)          |
| C(10) | 97(2)           | 77(2)           | 86(2)           | -12(1)          | -24(1)          | -31(1)          |
| C(11) | 87(2)           | 57(1)           | 70(1)           | -5(1)           | -12(1)          | -17(1)          |

|       |       |       |       |        |        |        |
|-------|-------|-------|-------|--------|--------|--------|
| C(12) | 44(1) | 49(1) | 55(1) | 7(1)   | 11(1)  | 9(1)   |
| C(13) | 41(1) | 37(1) | 53(1) | 0(1)   | 3(1)   | 0(1)   |
| C(14) | 46(1) | 44(1) | 59(1) | 6(1)   | -2(1)  | 4(1)   |
| C(15) | 40(1) | 54(1) | 85(1) | 2(1)   | 3(1)   | 9(1)   |
| C(16) | 50(1) | 68(1) | 80(1) | -15(1) | 17(1)  | 7(1)   |
| C(17) | 57(1) | 81(1) | 58(1) | -16(1) | 8(1)   | 5(1)   |
| C(18) | 42(1) | 66(1) | 56(1) | -9(1)  | 1(1)   | 6(1)   |
| C(19) | 41(1) | 40(1) | 49(1) | 5(1)   | -7(1)  | -2(1)  |
| C(20) | 64(1) | 45(1) | 66(1) | -4(1)  | 0(1)   | -9(1)  |
| C(21) | 85(2) | 45(1) | 88(2) | -4(1)  | -12(1) | -18(1) |
| C(22) | 57(1) | 68(1) | 75(1) | 20(1)  | -14(1) | -22(1) |
| C(23) | 48(1) | 77(1) | 69(1) | 14(1)  | 2(1)   | -13(1) |
| C(24) | 45(1) | 53(1) | 60(1) | 5(1)   | 3(1)   | -5(1)  |
| B(1)  | 40(1) | 38(1) | 45(1) | 1(1)   | -2(1)  | 1(1)   |
| N(1)  | 37(1) | 39(1) | 47(1) | 0(1)   | 5(1)   | 2(1)   |
| N(2)  | 47(1) | 52(1) | 57(1) | 4(1)   | -3(1)  | 5(1)   |
| O(1)  | 49(1) | 42(1) | 47(1) | 1(1)   | -1(1)  | -7(1)  |
| Cl(1) | 67(1) | 61(1) | 76(1) | 20(1)  | -4(1)  | 13(1)  |

**Table S11.** Hydrogen coordinates ( $\times 10^4$ ) and isotropic displacement parameters ( $\text{\AA}^2 \times 10^3$ ) for **11**.

|       | x    | y     | z     | U(eq) |
|-------|------|-------|-------|-------|
| H(2)  | 4948 | 230   | 6805  | 57    |
| H(4)  | 2966 | 668   | 5144  | 60    |
| H(7)  | 5950 | -1490 | 9344  | 84    |
| H(8)  | 7677 | -1396 | 11071 | 110   |
| H(9)  | 8755 | -406  | 11573 | 103   |
| H(10) | 8095 | 479   | 10333 | 108   |
| H(11) | 6363 | 404   | 8595  | 87    |
| H(14) | 6461 | -1834 | 6799  | 60    |
| H(15) | 8165 | -2158 | 5527  | 72    |
| H(16) | 7641 | -2194 | 3317  | 78    |
| H(17) | 5394 | -1917 | 2381  | 78    |
| H(18) | 3687 | -1594 | 3644  | 66    |
| H(20) | 3047 | -2731 | 5322  | 71    |



|        |      |       |      |    |
|--------|------|-------|------|----|
| H(21)  | 1426 | -3512 | 5828 | 89 |
| H(22)  | -52  | -3316 | 7369 | 82 |
| H(23)  | 90   | -2342 | 8469 | 78 |
| H(23A) | 1263 | -1384 | 4659 | 78 |
| H(24)  | 1689 | -1563 | 7974 | 63 |

---

**Table S12.** Torsion angles [°] for **11**.

|                         |             |
|-------------------------|-------------|
| O(1)-C(1)-C(2)-C(3)     | 5.4(2)      |
| C(6)-C(1)-C(2)-C(3)     | -172.58(15) |
| C(1)-C(2)-C(3)-N(1)     | -11.5(2)    |
| C(1)-C(2)-C(3)-C(4)     | 167.35(15)  |
| N(1)-C(3)-C(4)-C(12)    | -1.3(2)     |
| C(2)-C(3)-C(4)-C(12)    | 179.88(16)  |
| O(1)-C(1)-C(6)-C(7)     | 6.5(2)      |
| C(2)-C(1)-C(6)-C(7)     | -175.41(18) |
| O(1)-C(1)-C(6)-C(11)    | -174.62(18) |
| C(2)-C(1)-C(6)-C(11)    | 3.5(3)      |
| C(11)-C(6)-C(7)-C(8)    | -0.7(3)     |
| C(1)-C(6)-C(7)-C(8)     | 178.3(2)    |
| C(6)-C(7)-C(8)-C(9)     | 0.3(4)      |
| C(7)-C(8)-C(9)-C(10)    | 0.0(5)      |
| C(8)-C(9)-C(10)-C(11)   | 0.1(5)      |
| C(9)-C(10)-C(11)-C(6)   | -0.5(4)     |
| C(7)-C(6)-C(11)-C(10)   | 0.7(3)      |
| C(1)-C(6)-C(11)-C(10)   | -178.2(2)   |
| C(3)-C(4)-C(12)-N(2)    | 3.6(3)      |
| C(3)-C(4)-C(12)-Cl(1)   | -177.34(12) |
| C(18)-C(13)-C(14)-C(15) | -0.5(2)     |
| B(1)-C(13)-C(14)-C(15)  | 177.41(15)  |
| C(13)-C(14)-C(15)-C(16) | 0.4(3)      |
| C(14)-C(15)-C(16)-C(17) | -0.4(3)     |
| C(15)-C(16)-C(17)-C(18) | 0.3(3)      |
| C(16)-C(17)-C(18)-C(13) | -0.4(3)     |
| C(14)-C(13)-C(18)-C(17) | 0.4(3)      |
| B(1)-C(13)-C(18)-C(17)  | -177.40(17) |
| C(24)-C(19)-C(20)-C(21) | 0.2(3)      |
| B(1)-C(19)-C(20)-C(21)  | -179.69(16) |

|                         |             |
|-------------------------|-------------|
| C(19)-C(20)-C(21)-C(22) | 0.2(3)      |
| C(20)-C(21)-C(22)-C(23) | -0.6(3)     |
| C(21)-C(22)-C(23)-C(24) | 0.7(3)      |
| C(22)-C(23)-C(24)-C(19) | -0.3(3)     |
| C(20)-C(19)-C(24)-C(23) | -0.1(2)     |
| B(1)-C(19)-C(24)-C(23)  | 179.75(16)  |
| C(20)-C(19)-B(1)-O(1)   | -135.83(15) |
| C(24)-C(19)-B(1)-O(1)   | 44.31(18)   |
| C(20)-C(19)-B(1)-N(1)   | 110.67(17)  |
| C(24)-C(19)-B(1)-N(1)   | -69.19(18)  |
| C(20)-C(19)-B(1)-C(13)  | -10.7(2)    |
| C(24)-C(19)-B(1)-C(13)  | 169.47(14)  |
| C(18)-C(13)-B(1)-O(1)   | -156.59(14) |
| C(14)-C(13)-B(1)-O(1)   | 25.68(19)   |
| C(18)-C(13)-B(1)-C(19)  | 80.37(19)   |
| C(14)-C(13)-B(1)-C(19)  | -97.35(17)  |
| C(18)-C(13)-B(1)-N(1)   | -42.26(19)  |
| C(14)-C(13)-B(1)-N(1)   | 140.01(14)  |
| N(2)-C(5)-N(1)-C(3)     | 3.4(3)      |
| N(2)-C(5)-N(1)-B(1)     | -168.11(16) |
| C(4)-C(3)-N(1)-C(5)     | -1.9(2)     |
| C(2)-C(3)-N(1)-C(5)     | 177.01(14)  |
| C(4)-C(3)-N(1)-B(1)     | 169.93(13)  |
| C(2)-C(3)-N(1)-B(1)     | -11.2(2)    |
| O(1)-B(1)-N(1)-C(5)     | -153.34(14) |
| C(19)-B(1)-N(1)-C(5)    | -38.58(19)  |
| C(13)-B(1)-N(1)-C(5)    | 88.28(17)   |
| O(1)-B(1)-N(1)-C(3)     | 35.11(17)   |
| C(19)-B(1)-N(1)-C(3)    | 149.87(13)  |
| C(13)-B(1)-N(1)-C(3)    | -83.26(16)  |
| N(1)-C(5)-N(2)-C(12)    | -1.3(3)     |
| C(4)-C(12)-N(2)-C(5)    | -2.3(3)     |
| Cl(1)-C(12)-N(2)-C(5)   | 178.55(13)  |
| C(2)-C(1)-O(1)-B(1)     | 25.7(2)     |
| C(6)-C(1)-O(1)-B(1)     | -156.15(13) |
| C(19)-B(1)-O(1)-C(1)    | -158.99(13) |
| N(1)-B(1)-O(1)-C(1)     | -42.64(17)  |
| C(13)-B(1)-O(1)-C(1)    | 72.81(16)   |

---

Symmetry transformations used to generate equivalent atoms:

**Table S13.** Crystal data and structure refinement for **12**.

---

|                                   |                                                                      |                  |
|-----------------------------------|----------------------------------------------------------------------|------------------|
| Identification code               | 12                                                                   |                  |
| Empirical formula                 | C <sub>25</sub> H <sub>17</sub> B Cl F <sub>3</sub> N <sub>2</sub> O |                  |
| Formula weight                    | 464.67                                                               |                  |
| Temperature                       | 293(2) K                                                             |                  |
| Wavelength                        | 0.71075 Å                                                            |                  |
| Crystal system                    | Monoclinic                                                           |                  |
| Space group                       | P21/c                                                                |                  |
| Unit cell dimensions              | a = 10.343(3) Å                                                      | α = 90°.         |
|                                   | b = 20.367(8) Å                                                      | β = 92.628(11)°. |
|                                   | c = 10.514(2) Å                                                      | γ = 90°.         |
| Volume                            | 2212.5(12) Å <sup>3</sup>                                            |                  |
| Z                                 | 4                                                                    |                  |
| Density (calculated)              | 1.395 Mg/m <sup>3</sup>                                              |                  |
| Absorption coefficient            | 0.219 mm <sup>-1</sup>                                               |                  |
| F(000)                            | 952                                                                  |                  |
| Crystal size                      | 0.20 x 0.20 x 0.20 mm <sup>3</sup>                                   |                  |
| Theta range for data collection   | 1.97 to 27.92°.                                                      |                  |
| Index ranges                      | -13 ≤ h ≤ 13, -26 ≤ k ≤ 26, -13 ≤ l ≤ 13                             |                  |
| Reflections collected             | 22535                                                                |                  |
| Independent reflections           | 5121 [R(int) = 0.0351]                                               |                  |
| Completeness to theta = 27.92°    | 96.7 %                                                               |                  |
| Absorption correction             | Integration                                                          |                  |
| Max. and min. transmission        | 0.9576 and 0.9576                                                    |                  |
| Refinement method                 | Full-matrix least-squares on F <sup>2</sup>                          |                  |
| Data / restraints / parameters    | 5121 / 0 / 298                                                       |                  |
| Goodness-of-fit on F <sup>2</sup> | 1.104                                                                |                  |
| Final R indices [I > 2σ(I)]       | R1 = 0.0511, wR2 = 0.1350                                            |                  |
| R indices (all data)              | R1 = 0.0699, wR2 = 0.1559                                            |                  |
| Largest diff. peak and hole       | 0.168 and -0.217 e.Å <sup>-3</sup>                                   |                  |

---

**Table S14.** Atomic coordinates (x 10<sup>4</sup>) and equivalent isotropic displacement parameters (Å<sup>2</sup> x 10<sup>3</sup>) for **12**. U(eq) is defined as one third of the trace of the orthogonalized U<sup>ij</sup> tensor.

---

|   |   |   |       |
|---|---|---|-------|
| x | y | z | U(eq) |
|---|---|---|-------|

|       |         |          |          |       |
|-------|---------|----------|----------|-------|
| C(1)  | 5481(2) | 10635(1) | 12313(2) | 42(1) |
| C(2)  | 5793(2) | 10154(1) | 11479(2) | 45(1) |
| C(3)  | 6822(2) | 10238(1) | 10635(2) | 42(1) |
| C(4)  | 7349(2) | 9722(1)  | 9947(2)  | 48(1) |
| C(5)  | 8355(2) | 10919(1) | 9740(2)  | 53(1) |
| C(6)  | 4517(2) | 10558(1) | 13307(2) | 41(1) |
| C(7)  | 4167(2) | 11104(1) | 14021(2) | 53(1) |
| C(8)  | 3244(2) | 11052(1) | 14928(2) | 56(1) |
| C(9)  | 2661(2) | 10453(1) | 15153(2) | 47(1) |
| C(10) | 3005(2) | 9906(1)  | 14461(2) | 54(1) |
| C(11) | 3929(2) | 9957(1)  | 13546(2) | 50(1) |
| C(12) | 8340(2) | 9861(1)  | 9166(2)  | 51(1) |
| C(13) | 5482(2) | 11690(1) | 10092(2) | 48(1) |
| C(14) | 4241(2) | 11848(1) | 10477(2) | 54(1) |
| C(15) | 3261(2) | 12051(1) | 9613(3)  | 66(1) |
| C(16) | 3501(3) | 12102(1) | 8338(3)  | 73(1) |
| C(17) | 4712(3) | 11956(1) | 7925(3)  | 72(1) |
| C(18) | 5680(2) | 11753(1) | 8786(2)  | 62(1) |
| C(19) | 7670(2) | 12026(1) | 11527(2) | 48(1) |
| C(20) | 7758(2) | 12631(1) | 10923(3) | 69(1) |
| C(21) | 8689(3) | 13089(1) | 11313(3) | 85(1) |
| C(22) | 9542(3) | 12960(1) | 12312(3) | 78(1) |
| C(23) | 9485(3) | 12366(1) | 12928(3) | 78(1) |
| C(24) | 8558(2) | 11909(1) | 12535(2) | 64(1) |
| C(25) | 1640(2) | 10408(1) | 16113(2) | 57(1) |
| O(1)  | 6053(1) | 11217(1) | 12310(1) | 46(1) |
| N(1)  | 7349(2) | 10848(1) | 10499(2) | 43(1) |
| N(2)  | 8877(2) | 10452(1) | 9051(2)  | 57(1) |
| F(1)  | 1464(2) | 9802(1)  | 16542(2) | 82(1) |
| F(2)  | 493(1)  | 10620(1) | 15656(2) | 85(1) |
| F(3)  | 1919(2) | 10780(1) | 17152(1) | 79(1) |
| Cl(1) | 8975(1) | 9242(1)  | 8259(1)  | 69(1) |
| B(1)  | 6615(2) | 11474(1) | 11117(2) | 45(1) |

**Table S15.** Bond lengths [ $\text{\AA}$ ] and angles [ $^\circ$ ] for **12**.

|           |          |
|-----------|----------|
| C(1)-O(1) | 1.325(2) |
|-----------|----------|

|                |            |
|----------------|------------|
| C(1)-C(2)      | 1.363(3)   |
| C(1)-C(6)      | 1.485(3)   |
| C(2)-C(3)      | 1.428(3)   |
| C(3)-N(1)      | 1.367(2)   |
| C(3)-C(4)      | 1.400(3)   |
| C(4)-C(12)     | 1.372(3)   |
| C(5)-N(2)      | 1.327(3)   |
| C(5)-N(1)      | 1.348(3)   |
| C(6)-C(11)     | 1.395(3)   |
| C(6)-C(7)      | 1.399(3)   |
| C(7)-C(8)      | 1.384(3)   |
| C(8)-C(9)      | 1.387(3)   |
| C(9)-C(10)     | 1.386(3)   |
| C(9)-C(25)     | 1.497(3)   |
| C(10)-C(11)    | 1.391(3)   |
| C(12)-N(2)     | 1.334(3)   |
| C(12)-Cl(1)    | 1.729(2)   |
| C(13)-C(14)    | 1.401(3)   |
| C(13)-C(18)    | 1.404(3)   |
| C(13)-B(1)     | 1.616(3)   |
| C(14)-C(15)    | 1.392(3)   |
| C(15)-C(16)    | 1.379(4)   |
| C(16)-C(17)    | 1.376(4)   |
| C(17)-C(18)    | 1.382(3)   |
| C(19)-C(24)    | 1.391(3)   |
| C(19)-C(20)    | 1.391(3)   |
| C(19)-B(1)     | 1.612(3)   |
| C(20)-C(21)    | 1.390(3)   |
| C(21)-C(22)    | 1.365(4)   |
| C(22)-C(23)    | 1.375(4)   |
| C(23)-C(24)    | 1.386(3)   |
| C(25)-F(1)     | 1.329(3)   |
| C(25)-F(2)     | 1.331(3)   |
| C(25)-F(3)     | 1.350(3)   |
| O(1)-B(1)      | 1.500(3)   |
| N(1)-B(1)      | 1.633(3)   |
| O(1)-C(1)-C(2) | 121.51(17) |
| O(1)-C(1)-C(6) | 114.27(16) |
| C(2)-C(1)-C(6) | 124.21(16) |

|                   |            |
|-------------------|------------|
| C(1)-C(2)-C(3)    | 121.29(17) |
| N(1)-C(3)-C(4)    | 117.58(18) |
| N(1)-C(3)-C(2)    | 119.04(16) |
| C(4)-C(3)-C(2)    | 123.36(17) |
| C(12)-C(4)-C(3)   | 118.21(18) |
| N(2)-C(5)-N(1)    | 126.26(19) |
| C(11)-C(6)-C(7)   | 118.35(18) |
| C(11)-C(6)-C(1)   | 122.18(16) |
| C(7)-C(6)-C(1)    | 119.46(16) |
| C(8)-C(7)-C(6)    | 120.91(18) |
| C(7)-C(8)-C(9)    | 120.21(18) |
| C(10)-C(9)-C(8)   | 119.60(19) |
| C(10)-C(9)-C(25)  | 120.76(18) |
| C(8)-C(9)-C(25)   | 119.62(18) |
| C(9)-C(10)-C(11)  | 120.33(18) |
| C(10)-C(11)-C(6)  | 120.60(18) |
| N(2)-C(12)-C(4)   | 124.51(18) |
| N(2)-C(12)-Cl(1)  | 115.96(16) |
| C(4)-C(12)-Cl(1)  | 119.53(16) |
| C(14)-C(13)-C(18) | 116.0(2)   |
| C(14)-C(13)-B(1)  | 121.03(19) |
| C(18)-C(13)-B(1)  | 122.90(19) |
| C(15)-C(14)-C(13) | 121.9(2)   |
| C(16)-C(15)-C(14) | 120.0(2)   |
| C(17)-C(16)-C(15) | 119.8(2)   |
| C(16)-C(17)-C(18) | 120.0(3)   |
| C(17)-C(18)-C(13) | 122.3(2)   |
| C(24)-C(19)-C(20) | 116.4(2)   |
| C(24)-C(19)-B(1)  | 119.99(18) |
| C(20)-C(19)-B(1)  | 123.6(2)   |
| C(21)-C(20)-C(19) | 121.3(2)   |
| C(22)-C(21)-C(20) | 120.8(2)   |
| C(21)-C(22)-C(23) | 119.5(2)   |
| C(22)-C(23)-C(24) | 119.6(3)   |
| C(23)-C(24)-C(19) | 122.4(2)   |
| F(1)-C(25)-F(2)   | 106.9(2)   |
| F(1)-C(25)-F(3)   | 105.94(19) |
| F(2)-C(25)-F(3)   | 105.30(18) |
| F(1)-C(25)-C(9)   | 113.39(17) |
| F(2)-C(25)-C(9)   | 112.42(19) |

|                  |            |
|------------------|------------|
| F(3)-C(25)-C(9)  | 112.34(19) |
| C(1)-O(1)-B(1)   | 120.24(15) |
| C(5)-N(1)-C(3)   | 118.76(16) |
| C(5)-N(1)-B(1)   | 122.51(15) |
| C(3)-N(1)-B(1)   | 118.24(15) |
| C(5)-N(2)-C(12)  | 114.60(19) |
| O(1)-B(1)-C(19)  | 107.63(16) |
| O(1)-B(1)-C(13)  | 110.81(16) |
| C(19)-B(1)-C(13) | 116.74(16) |
| O(1)-B(1)-N(1)   | 105.42(14) |
| C(19)-B(1)-N(1)  | 109.20(16) |
| C(13)-B(1)-N(1)  | 106.47(15) |

---

Symmetry transformations used to generate equivalent atoms:

**Table S16.** Anisotropic displacement parameters ( $\text{\AA}^2 \times 10^3$ ) for **12**. The anisotropic displacement factor exponent takes the form:  $-2\pi^2 [ h^2 a^{*2} U^{11} + \dots + 2 h k a^* b^* U^{12} ]$

|       | U <sup>11</sup> | U <sup>22</sup> | U <sup>33</sup> | U <sup>23</sup> | U <sup>13</sup> | U <sup>12</sup> |
|-------|-----------------|-----------------|-----------------|-----------------|-----------------|-----------------|
| C(1)  | 44(1)           | 35(1)           | 46(1)           | 2(1)            | -1(1)           | -3(1)           |
| C(2)  | 48(1)           | 38(1)           | 50(1)           | -3(1)           | 7(1)            | -7(1)           |
| C(3)  | 44(1)           | 39(1)           | 43(1)           | -2(1)           | -1(1)           | -2(1)           |
| C(4)  | 53(1)           | 41(1)           | 51(1)           | -6(1)           | 3(1)            | -1(1)           |
| C(5)  | 52(1)           | 49(1)           | 59(1)           | 0(1)            | 10(1)           | -5(1)           |
| C(6)  | 43(1)           | 38(1)           | 43(1)           | 1(1)            | 2(1)            | 0(1)            |
| C(7)  | 64(1)           | 38(1)           | 57(1)           | -1(1)           | 13(1)           | -5(1)           |
| C(8)  | 67(1)           | 42(1)           | 58(1)           | -4(1)           | 14(1)           | 4(1)            |
| C(9)  | 45(1)           | 49(1)           | 49(1)           | 4(1)            | 5(1)            | 4(1)            |
| C(10) | 56(1)           | 43(1)           | 64(1)           | -1(1)           | 12(1)           | -8(1)           |
| C(11) | 56(1)           | 38(1)           | 58(1)           | -3(1)           | 9(1)            | -4(1)           |
| C(12) | 48(1)           | 54(1)           | 51(1)           | -7(1)           | 1(1)            | 6(1)            |
| C(13) | 55(1)           | 33(1)           | 56(1)           | 0(1)            | 2(1)            | -5(1)           |
| C(14) | 55(1)           | 40(1)           | 66(1)           | -1(1)           | 3(1)            | -3(1)           |
| C(15) | 56(1)           | 44(1)           | 99(2)           | 4(1)            | -6(1)           | 0(1)            |
| C(16) | 76(2)           | 56(1)           | 83(2)           | 9(1)            | -23(1)          | -1(1)           |
| C(17) | 88(2)           | 69(2)           | 59(1)           | 10(1)           | -7(1)           | 4(1)            |
| C(18) | 68(1)           | 61(1)           | 57(1)           | 5(1)            | 4(1)            | 6(1)            |
| C(19) | 50(1)           | 38(1)           | 56(1)           | -5(1)           | 10(1)           | -5(1)           |

|       |       |        |        |        |       |        |
|-------|-------|--------|--------|--------|-------|--------|
| C(20) | 67(1) | 47(1)  | 92(2)  | 10(1)  | -1(1) | -13(1) |
| C(21) | 79(2) | 45(1)  | 130(3) | 9(1)   | 4(2)  | -22(1) |
| C(22) | 70(2) | 61(1)  | 104(2) | -18(1) | 13(2) | -28(1) |
| C(23) | 72(2) | 81(2)  | 81(2)  | -9(1)  | -9(1) | -23(1) |
| C(24) | 70(1) | 53(1)  | 69(1)  | -2(1)  | -4(1) | -16(1) |
| C(25) | 52(1) | 60(1)  | 61(1)  | 1(1)   | 10(1) | 7(1)   |
| O(1)  | 53(1) | 38(1)  | 49(1)  | -4(1)  | 9(1)  | -9(1)  |
| N(1)  | 44(1) | 38(1)  | 47(1)  | 1(1)   | 3(1)  | -2(1)  |
| N(2)  | 53(1) | 60(1)  | 60(1)  | -5(1)  | 11(1) | -3(1)  |
| F(1)  | 85(1) | 68(1)  | 96(1)  | 16(1)  | 40(1) | -4(1)  |
| F(2)  | 52(1) | 106(1) | 96(1)  | -1(1)  | 9(1)  | 19(1)  |
| F(3)  | 83(1) | 93(1)  | 61(1)  | -11(1) | 22(1) | -4(1)  |
| Cl(1) | 67(1) | 72(1)  | 71(1)  | -21(1) | 15(1) | 9(1)   |
| B(1)  | 48(1) | 36(1)  | 50(1)  | -1(1)  | 6(1)  | -4(1)  |

**Table S17.** Hydrogen coordinates (x 10<sup>4</sup>) and isotropic displacement parameters (Å<sup>2</sup>x 10<sup>3</sup>) for **12**.

|       | x     | y     | z     | U(eq) |
|-------|-------|-------|-------|-------|
| H(2)  | 5326  | 9764  | 11460 | 54    |
| H(4)  | 7035  | 9296  | 10018 | 58    |
| H(5)  | 8717  | 11336 | 9694  | 63    |
| H(7)  | 4560  | 11507 | 13885 | 63    |
| H(8)  | 3013  | 11421 | 15387 | 67    |
| H(10) | 2616  | 9503  | 14609 | 64    |
| H(11) | 4157  | 9586  | 13089 | 60    |
| H(14) | 4066  | 11816 | 11335 | 65    |
| H(15) | 2446  | 12151 | 9896  | 80    |
| H(16) | 2847  | 12234 | 7758  | 87    |
| H(17) | 4878  | 11993 | 7066  | 87    |
| H(18) | 6492  | 11656 | 8490  | 74    |
| H(20) | 7183  | 12730 | 10245 | 82    |
| H(21) | 8732  | 13489 | 10889 | 102   |
| H(22) | 10156 | 13271 | 12573 | 94    |
| H(23) | 10066 | 12271 | 13605 | 94    |
| H(24) | 8527  | 11509 | 12962 | 77    |



---

**Table S18.** Torsion angles [°] for **12**.

---

|                         |             |
|-------------------------|-------------|
| O(1)-C(1)-C(2)-C(3)     | 5.1(3)      |
| C(6)-C(1)-C(2)-C(3)     | -173.42(17) |
| C(1)-C(2)-C(3)-N(1)     | -11.8(3)    |
| C(1)-C(2)-C(3)-C(4)     | 166.90(19)  |
| N(1)-C(3)-C(4)-C(12)    | -1.1(3)     |
| C(2)-C(3)-C(4)-C(12)    | -179.79(18) |
| O(1)-C(1)-C(6)-C(11)    | -172.60(17) |
| C(2)-C(1)-C(6)-C(11)    | 6.0(3)      |
| O(1)-C(1)-C(6)-C(7)     | 8.3(3)      |
| C(2)-C(1)-C(6)-C(7)     | -173.09(19) |
| C(11)-C(6)-C(7)-C(8)    | -1.1(3)     |
| C(1)-C(6)-C(7)-C(8)     | 178.03(19)  |
| C(6)-C(7)-C(8)-C(9)     | 0.9(3)      |
| C(7)-C(8)-C(9)-C(10)    | -0.3(3)     |
| C(7)-C(8)-C(9)-C(25)    | -178.5(2)   |
| C(8)-C(9)-C(10)-C(11)   | 0.1(3)      |
| C(25)-C(9)-C(10)-C(11)  | 178.2(2)    |
| C(9)-C(10)-C(11)-C(6)   | -0.4(3)     |
| C(7)-C(6)-C(11)-C(10)   | 0.8(3)      |
| C(1)-C(6)-C(11)-C(10)   | -178.26(18) |
| C(3)-C(4)-C(12)-N(2)    | 2.8(3)      |
| C(3)-C(4)-C(12)-Cl(1)   | -177.67(14) |
| C(18)-C(13)-C(14)-C(15) | 0.5(3)      |
| B(1)-C(13)-C(14)-C(15)  | 178.38(18)  |
| C(13)-C(14)-C(15)-C(16) | -0.1(3)     |
| C(14)-C(15)-C(16)-C(17) | -0.4(3)     |
| C(15)-C(16)-C(17)-C(18) | 0.5(4)      |
| C(16)-C(17)-C(18)-C(13) | -0.1(4)     |
| C(14)-C(13)-C(18)-C(17) | -0.4(3)     |
| B(1)-C(13)-C(18)-C(17)  | -178.2(2)   |
| C(24)-C(19)-C(20)-C(21) | 0.2(4)      |
| B(1)-C(19)-C(20)-C(21)  | -179.9(2)   |
| C(19)-C(20)-C(21)-C(22) | -0.5(5)     |
| C(20)-C(21)-C(22)-C(23) | 0.7(5)      |
| C(21)-C(22)-C(23)-C(24) | -0.6(4)     |

|                         |             |
|-------------------------|-------------|
| C(22)-C(23)-C(24)-C(19) | 0.2(4)      |
| C(20)-C(19)-C(24)-C(23) | 0.0(4)      |
| B(1)-C(19)-C(24)-C(23)  | -180.0(2)   |
| C(10)-C(9)-C(25)-F(1)   | 22.5(3)     |
| C(8)-C(9)-C(25)-F(1)    | -159.4(2)   |
| C(10)-C(9)-C(25)-F(2)   | -98.8(2)    |
| C(8)-C(9)-C(25)-F(2)    | 79.3(3)     |
| C(10)-C(9)-C(25)-F(3)   | 142.6(2)    |
| C(8)-C(9)-C(25)-F(3)    | -39.3(3)    |
| C(2)-C(1)-O(1)-B(1)     | 25.9(3)     |
| C(6)-C(1)-O(1)-B(1)     | -155.49(16) |
| N(2)-C(5)-N(1)-C(3)     | 2.7(3)      |
| N(2)-C(5)-N(1)-B(1)     | -169.2(2)   |
| C(4)-C(3)-N(1)-C(5)     | -1.4(3)     |
| C(2)-C(3)-N(1)-C(5)     | 177.38(17)  |
| C(4)-C(3)-N(1)-B(1)     | 170.88(17)  |
| C(2)-C(3)-N(1)-B(1)     | -10.4(2)    |
| N(1)-C(5)-N(2)-C(12)    | -1.2(3)     |
| C(4)-C(12)-N(2)-C(5)    | -1.6(3)     |
| Cl(1)-C(12)-N(2)-C(5)   | 178.80(16)  |
| C(1)-O(1)-B(1)-C(19)    | -158.84(16) |
| C(1)-O(1)-B(1)-C(13)    | 72.4(2)     |
| C(1)-O(1)-B(1)-N(1)     | -42.4(2)    |
| C(24)-C(19)-B(1)-O(1)   | 45.3(3)     |
| C(20)-C(19)-B(1)-O(1)   | -134.7(2)   |
| C(24)-C(19)-B(1)-C(13)  | 170.5(2)    |
| C(20)-C(19)-B(1)-C(13)  | -9.4(3)     |
| C(24)-C(19)-B(1)-N(1)   | -68.7(2)    |
| C(20)-C(19)-B(1)-N(1)   | 111.4(2)    |
| C(14)-C(13)-B(1)-O(1)   | 22.5(2)     |
| C(18)-C(13)-B(1)-O(1)   | -159.84(18) |
| C(14)-C(13)-B(1)-C(19)  | -101.2(2)   |
| C(18)-C(13)-B(1)-C(19)  | 76.5(2)     |
| C(14)-C(13)-B(1)-N(1)   | 136.60(17)  |
| C(18)-C(13)-B(1)-N(1)   | -45.7(2)    |
| C(5)-N(1)-B(1)-O(1)     | -153.71(17) |
| C(3)-N(1)-B(1)-O(1)     | 34.4(2)     |
| C(5)-N(1)-B(1)-C(19)    | -38.3(2)    |
| C(3)-N(1)-B(1)-C(19)    | 149.76(16)  |
| C(5)-N(1)-B(1)-C(13)    | 88.5(2)     |

---

Symmetry transformations used to generate equivalent atoms:

**Table S19.** Crystal data and structure refinement for **13**.

---

|                                   |                                                       |                              |
|-----------------------------------|-------------------------------------------------------|------------------------------|
| Identification code               | 13                                                    |                              |
| Empirical formula                 | C <sub>25</sub> H <sub>17</sub> B Cl N <sub>3</sub> O |                              |
| Formula weight                    | 421.68                                                |                              |
| Temperature                       | 293(2) K                                              |                              |
| Wavelength                        | 0.71075 Å                                             |                              |
| Crystal system                    | Monoclinic                                            |                              |
| Space group                       | P21/a                                                 |                              |
| Unit cell dimensions              | a = 10.425(4) Å                                       | $\alpha = 90^\circ$ .        |
|                                   | b = 21.350(6) Å                                       | $\beta = 117.211(8)^\circ$ . |
|                                   | c = 10.573(3) Å                                       | $\gamma = 90^\circ$ .        |
| Volume                            | 2092.8(12) Å <sup>3</sup>                             |                              |
| Z                                 | 4                                                     |                              |
| Density (calculated)              | 1.338 Mg/m <sup>3</sup>                               |                              |
| Absorption coefficient            | 0.205 mm <sup>-1</sup>                                |                              |
| F(000)                            | 872                                                   |                              |
| Crystal size                      | 0.20 x 0.20 x 0.20 mm <sup>3</sup>                    |                              |
| Theta range for data collection   | 1.91 to 27.48°.                                       |                              |
| Index ranges                      | -13 ≤ h ≤ 13, -27 ≤ k ≤ 27, -13 ≤ l ≤ 13              |                              |
| Reflections collected             | 20973                                                 |                              |
| Independent reflections           | 4786 [R(int) = 0.0497]                                |                              |
| Completeness to theta = 27.48°    | 99.7 %                                                |                              |
| Absorption correction             | Integration                                           |                              |
| Max. and min. transmission        | 0.9601 and 0.9601                                     |                              |
| Refinement method                 | Full-matrix least-squares on F <sup>2</sup>           |                              |
| Data / restraints / parameters    | 4786 / 0 / 280                                        |                              |
| Goodness-of-fit on F <sup>2</sup> | 1.062                                                 |                              |
| Final R indices [I > 2σ(I)]       | R1 = 0.0549, wR2 = 0.1432                             |                              |
| R indices (all data)              | R1 = 0.0782, wR2 = 0.1665                             |                              |
| Largest diff. peak and hole       | 0.186 and -0.395 e.Å <sup>-3</sup>                    |                              |

---

**Table S20.** Atomic coordinates ( $\times 10^4$ ) and equivalent isotropic displacement parameters ( $\text{\AA}^2 \times 10^3$ ) for **13**.  $U(\text{eq})$  is defined as one third of the trace of the orthogonalized  $U^{ij}$  tensor.

|       | x        | y        | z        | $U(\text{eq})$ |
|-------|----------|----------|----------|----------------|
| C(1)  | 7371(2)  | 9131(1)  | 5258(2)  | 46(1)          |
| C(2)  | 7826(2)  | 9624(1)  | 4764(2)  | 51(1)          |
| C(3)  | 8223(2)  | 9551(1)  | 3653(2)  | 45(1)          |
| C(4)  | 8459(2)  | 10048(1) | 2932(2)  | 54(1)          |
| C(5)  | 8658(2)  | 8880(1)  | 2171(2)  | 53(1)          |
| C(6)  | 6816(2)  | 9180(1)  | 6313(2)  | 48(1)          |
| C(7)  | 6671(2)  | 8638(1)  | 6958(2)  | 54(1)          |
| C(8)  | 6216(2)  | 8663(1)  | 7983(2)  | 59(1)          |
| C(9)  | 5862(2)  | 9235(1)  | 8360(2)  | 52(1)          |
| C(10) | 5966(3)  | 9777(1)  | 7709(2)  | 61(1)          |
| C(11) | 6449(3)  | 9751(1)  | 6696(2)  | 60(1)          |
| C(12) | 8817(2)  | 9904(1)  | 1879(2)  | 54(1)          |
| N(1)  | 8354(2)  | 8956(1)  | 3253(2)  | 44(1)          |
| N(2)  | 8906(2)  | 9325(1)  | 1459(2)  | 55(1)          |
| N(3)  | 5044(3)  | 9240(1)  | 10312(2) | 78(1)          |
| O(1)  | 7364(2)  | 8553(1)  | 4811(1)  | 49(1)          |
| B(1)  | 8358(2)  | 8364(1)  | 4217(2)  | 44(1)          |
| C(13) | 9983(2)  | 8281(1)  | 5453(2)  | 46(1)          |
| C(14) | 10280(2) | 8162(1)  | 6855(2)  | 52(1)          |
| C(15) | 11664(3) | 8060(1)  | 7914(2)  | 60(1)          |
| C(16) | 12800(3) | 8064(1)  | 7607(2)  | 66(1)          |
| C(17) | 12558(3) | 8175(1)  | 6236(3)  | 69(1)          |
| C(18) | 11175(2) | 8280(1)  | 5190(2)  | 59(1)          |
| C(19) | 7669(2)  | 7770(1)  | 3202(2)  | 50(1)          |
| C(20) | 8436(3)  | 7223(1)  | 3305(3)  | 71(1)          |
| C(21) | 7764(5)  | 6720(1)  | 2404(5)  | 107(1)         |
| C(22) | 6340(5)  | 6752(2)  | 1409(4)  | 114(2)         |
| C(23) | 5577(4)  | 7287(2)  | 1280(3)  | 94(1)          |
| C(24) | 6228(3)  | 7788(1)  | 2166(2)  | 66(1)          |
| C(25) | 5389(3)  | 9246(1)  | 9447(2)  | 60(1)          |
| Cl(1) | 9197(1)  | 10487(1) | 991(1)   | 91(1)          |

**Table S21.** Bond lengths [ $\text{\AA}$ ] and angles [ $^\circ$ ] for **13**.

---

|                |            |
|----------------|------------|
| C(1)-O(1)      | 1.320(2)   |
| C(1)-C(2)      | 1.354(3)   |
| C(1)-C(6)      | 1.477(3)   |
| C(2)-C(3)      | 1.422(3)   |
| C(3)-N(1)      | 1.366(2)   |
| C(3)-C(4)      | 1.392(3)   |
| C(4)-C(12)     | 1.362(3)   |
| C(5)-N(2)      | 1.309(3)   |
| C(5)-N(1)      | 1.329(2)   |
| C(6)-C(7)      | 1.386(3)   |
| C(6)-C(11)     | 1.394(3)   |
| C(7)-C(8)      | 1.369(3)   |
| C(8)-C(9)      | 1.386(3)   |
| C(9)-C(10)     | 1.377(3)   |
| C(9)-C(25)     | 1.442(3)   |
| C(10)-C(11)    | 1.377(3)   |
| C(12)-N(2)     | 1.331(3)   |
| C(12)-Cl(1)    | 1.711(2)   |
| N(1)-B(1)      | 1.621(3)   |
| N(3)-C(25)     | 1.127(3)   |
| O(1)-B(1)      | 1.492(2)   |
| B(1)-C(19)     | 1.604(3)   |
| B(1)-C(13)     | 1.608(3)   |
| C(13)-C(18)    | 1.392(3)   |
| C(13)-C(14)    | 1.393(3)   |
| C(14)-C(15)    | 1.381(3)   |
| C(15)-C(16)    | 1.364(3)   |
| C(16)-C(17)    | 1.373(3)   |
| C(17)-C(18)    | 1.376(3)   |
| C(19)-C(20)    | 1.390(3)   |
| C(19)-C(24)    | 1.398(3)   |
| C(20)-C(21)    | 1.394(4)   |
| C(21)-C(22)    | 1.373(6)   |
| C(22)-C(23)    | 1.364(5)   |
| C(23)-C(24)    | 1.378(3)   |
| <br>           |            |
| O(1)-C(1)-C(2) | 122.30(17) |
| O(1)-C(1)-C(6) | 113.38(17) |
| C(2)-C(1)-C(6) | 124.31(17) |

|                   |            |
|-------------------|------------|
| C(1)-C(2)-C(3)    | 121.29(17) |
| N(1)-C(3)-C(4)    | 118.18(17) |
| N(1)-C(3)-C(2)    | 117.73(16) |
| C(4)-C(3)-C(2)    | 124.08(17) |
| C(12)-C(4)-C(3)   | 117.34(18) |
| N(2)-C(5)-N(1)    | 126.47(18) |
| C(7)-C(6)-C(11)   | 118.80(18) |
| C(7)-C(6)-C(1)    | 118.75(16) |
| C(11)-C(6)-C(1)   | 122.45(19) |
| C(8)-C(7)-C(6)    | 120.80(18) |
| C(7)-C(8)-C(9)    | 119.8(2)   |
| C(10)-C(9)-C(8)   | 120.35(19) |
| C(10)-C(9)-C(25)  | 121.23(18) |
| C(8)-C(9)-C(25)   | 118.4(2)   |
| C(9)-C(10)-C(11)  | 119.69(19) |
| C(10)-C(11)-C(6)  | 120.5(2)   |
| N(2)-C(12)-C(4)   | 124.66(19) |
| N(2)-C(12)-Cl(1)  | 115.11(16) |
| C(4)-C(12)-Cl(1)  | 120.23(16) |
| C(5)-N(1)-C(3)    | 118.43(16) |
| C(5)-N(1)-B(1)    | 120.86(15) |
| C(3)-N(1)-B(1)    | 120.18(15) |
| C(5)-N(2)-C(12)   | 114.84(18) |
| C(1)-O(1)-B(1)    | 120.79(15) |
| O(1)-B(1)-C(19)   | 108.08(16) |
| O(1)-B(1)-C(13)   | 111.36(15) |
| C(19)-B(1)-C(13)  | 116.07(16) |
| O(1)-B(1)-N(1)    | 104.56(14) |
| C(19)-B(1)-N(1)   | 108.93(15) |
| C(13)-B(1)-N(1)   | 107.21(15) |
| C(18)-C(13)-C(14) | 115.39(19) |
| C(18)-C(13)-B(1)  | 122.89(17) |
| C(14)-C(13)-B(1)  | 121.59(17) |
| C(15)-C(14)-C(13) | 122.2(2)   |
| C(16)-C(15)-C(14) | 120.4(2)   |
| C(15)-C(16)-C(17) | 119.5(2)   |
| C(16)-C(17)-C(18) | 119.7(2)   |
| C(17)-C(18)-C(13) | 122.9(2)   |
| C(20)-C(19)-C(24) | 117.3(2)   |
| C(20)-C(19)-B(1)  | 123.1(2)   |

|                   |            |
|-------------------|------------|
| C(24)-C(19)-B(1)  | 119.58(19) |
| C(19)-C(20)-C(21) | 120.2(3)   |
| C(22)-C(21)-C(20) | 121.0(3)   |
| C(23)-C(22)-C(21) | 119.6(3)   |
| C(22)-C(23)-C(24) | 120.0(3)   |
| C(23)-C(24)-C(19) | 121.9(3)   |
| N(3)-C(25)-C(9)   | 178.0(3)   |

---

Symmetry transformations used to generate equivalent atoms:

**Table S22.** Anisotropic displacement parameters ( $\text{\AA}^2 \times 10^3$ ) for **13**. The anisotropic displacement factor exponent takes the form:  $-2\pi^2 [ h^2 a^{*2} U^{11} + \dots + 2 h k a^* b^* U^{12} ]$

|       | U <sup>11</sup> | U <sup>22</sup> | U <sup>33</sup> | U <sup>23</sup> | U <sup>13</sup> | U <sup>12</sup> |
|-------|-----------------|-----------------|-----------------|-----------------|-----------------|-----------------|
| C(1)  | 48(1)           | 45(1)           | 48(1)           | -8(1)           | 24(1)           | 3(1)            |
| C(2)  | 64(1)           | 42(1)           | 54(1)           | -10(1)          | 32(1)           | 0(1)            |
| C(3)  | 49(1)           | 39(1)           | 48(1)           | -6(1)           | 23(1)           | -1(1)           |
| C(4)  | 71(1)           | 38(1)           | 59(1)           | -5(1)           | 35(1)           | -2(1)           |
| C(5)  | 72(1)           | 42(1)           | 56(1)           | -4(1)           | 40(1)           | -1(1)           |
| C(6)  | 47(1)           | 51(1)           | 49(1)           | -8(1)           | 26(1)           | 4(1)            |
| C(7)  | 64(1)           | 45(1)           | 70(1)           | -11(1)          | 45(1)           | -1(1)           |
| C(8)  | 71(1)           | 53(1)           | 71(1)           | -5(1)           | 49(1)           | -1(1)           |
| C(9)  | 55(1)           | 59(1)           | 51(1)           | -9(1)           | 31(1)           | 3(1)            |
| C(10) | 83(2)           | 53(1)           | 62(1)           | -4(1)           | 45(1)           | 13(1)           |
| C(11) | 83(2)           | 51(1)           | 62(1)           | 1(1)            | 47(1)           | 14(1)           |
| C(12) | 68(1)           | 44(1)           | 54(1)           | 1(1)            | 32(1)           | -4(1)           |
| N(1)  | 53(1)           | 38(1)           | 48(1)           | -4(1)           | 29(1)           | -2(1)           |
| N(2)  | 74(1)           | 45(1)           | 57(1)           | -1(1)           | 40(1)           | -1(1)           |
| N(3)  | 111(2)          | 69(1)           | 83(1)           | -2(1)           | 70(1)           | 10(1)           |
| O(1)  | 60(1)           | 43(1)           | 58(1)           | -9(1)           | 39(1)           | -3(1)           |
| B(1)  | 57(1)           | 37(1)           | 49(1)           | -5(1)           | 34(1)           | 0(1)            |
| C(13) | 57(1)           | 39(1)           | 50(1)           | -7(1)           | 32(1)           | -2(1)           |
| C(14) | 62(1)           | 50(1)           | 53(1)           | -2(1)           | 35(1)           | 0(1)            |
| C(15) | 73(1)           | 61(1)           | 50(1)           | 1(1)            | 31(1)           | 4(1)            |
| C(16) | 61(1)           | 73(2)           | 59(1)           | -2(1)           | 24(1)           | 2(1)            |
| C(17) | 57(1)           | 89(2)           | 68(1)           | -3(1)           | 36(1)           | 1(1)            |
| C(18) | 60(1)           | 72(1)           | 55(1)           | -2(1)           | 36(1)           | 1(1)            |
| C(19) | 71(1)           | 42(1)           | 52(1)           | -7(1)           | 42(1)           | -11(1)          |

|       |        |        |        |        |        |        |
|-------|--------|--------|--------|--------|--------|--------|
| C(20) | 100(2) | 45(1)  | 96(2)  | -15(1) | 70(2)  | -7(1)  |
| C(21) | 167(3) | 55(2)  | 166(3) | -44(2) | 135(3) | -33(2) |
| C(22) | 179(4) | 103(3) | 114(3) | -69(2) | 113(3) | -89(3) |
| C(23) | 129(3) | 102(2) | 57(1)  | -24(1) | 50(2)  | -65(2) |
| C(24) | 81(2)  | 65(1)  | 55(1)  | -4(1)  | 34(1)  | -23(1) |
| C(25) | 76(1)  | 55(1)  | 60(1)  | -7(1)  | 42(1)  | 4(1)   |
| Cl(1) | 160(1) | 51(1)  | 94(1)  | 5(1)   | 86(1)  | -13(1) |

**Table S23.** Hydrogen coordinates ( $\times 10^4$ ) and isotropic displacement parameters ( $\text{\AA}^2 \times 10^3$ ) for **13**.

|       | x     | y     | z    | U(eq) |
|-------|-------|-------|------|-------|
| H(2)  | 7880  | 10018 | 5160 | 61    |
| H(4)  | 8376  | 10461 | 3161 | 65    |
| H(5)  | 8697  | 8470  | 1892 | 63    |
| H(7)  | 6886  | 8252  | 6691 | 65    |
| H(8)  | 6144  | 8297  | 8425 | 71    |
| H(10) | 5710  | 10160 | 7951 | 73    |
| H(11) | 6531  | 10118 | 6265 | 72    |
| H(14) | 9520  | 8151  | 7086 | 62    |
| H(15) | 11823 | 7987  | 8841 | 72    |
| H(16) | 13732 | 7993  | 8320 | 79    |
| H(17) | 13325 | 8179  | 6015 | 82    |
| H(18) | 11031 | 8354  | 4267 | 71    |
| H(20) | 9399  | 7193  | 3978 | 85    |
| H(21) | 8288  | 6357  | 2477 | 128   |
| H(22) | 5899  | 6410  | 826  | 137   |
| H(23) | 4619  | 7315  | 595  | 112   |
| H(24) | 5692  | 8149  | 2071 | 79    |

**Table S24.** Torsion angles [ $^\circ$ ] for **13**.

|                     |             |
|---------------------|-------------|
| O(1)-C(1)-C(2)-C(3) | 4.7(3)      |
| C(6)-C(1)-C(2)-C(3) | -174.09(19) |



|                        |             |
|------------------------|-------------|
| C(1)-C(2)-C(3)-N(1)    | -10.3(3)    |
| C(1)-C(2)-C(3)-C(4)    | 168.5(2)    |
| N(1)-C(3)-C(4)-C(12)   | -0.4(3)     |
| C(2)-C(3)-C(4)-C(12)   | -179.2(2)   |
| O(1)-C(1)-C(6)-C(7)    | 14.6(3)     |
| C(2)-C(1)-C(6)-C(7)    | -166.5(2)   |
| O(1)-C(1)-C(6)-C(11)   | -166.26(19) |
| C(2)-C(1)-C(6)-C(11)   | 12.7(3)     |
| C(11)-C(6)-C(7)-C(8)   | -1.8(3)     |
| C(1)-C(6)-C(7)-C(8)    | 177.4(2)    |
| C(6)-C(7)-C(8)-C(9)    | 1.5(3)      |
| C(7)-C(8)-C(9)-C(10)   | 0.0(4)      |
| C(7)-C(8)-C(9)-C(25)   | -179.8(2)   |
| C(8)-C(9)-C(10)-C(11)  | -1.2(4)     |
| C(25)-C(9)-C(10)-C(11) | 178.7(2)    |
| C(9)-C(10)-C(11)-C(6)  | 0.8(4)      |
| C(7)-C(6)-C(11)-C(10)  | 0.7(3)      |
| C(1)-C(6)-C(11)-C(10)  | -178.5(2)   |
| C(3)-C(4)-C(12)-N(2)   | 2.5(3)      |
| C(3)-C(4)-C(12)-Cl(1)  | -177.34(16) |
| N(2)-C(5)-N(1)-C(3)    | 2.9(3)      |
| N(2)-C(5)-N(1)-B(1)    | -168.7(2)   |
| C(4)-C(3)-N(1)-C(5)    | -2.0(3)     |
| C(2)-C(3)-N(1)-C(5)    | 176.87(18)  |
| C(4)-C(3)-N(1)-B(1)    | 169.68(18)  |
| C(2)-C(3)-N(1)-B(1)    | -11.4(3)    |
| N(1)-C(5)-N(2)-C(12)   | -1.0(3)     |
| C(4)-C(12)-N(2)-C(5)   | -1.8(3)     |
| Cl(1)-C(12)-N(2)-C(5)  | 178.02(17)  |
| C(2)-C(1)-O(1)-B(1)    | 24.8(3)     |
| C(6)-C(1)-O(1)-B(1)    | -156.24(17) |
| C(1)-O(1)-B(1)-C(19)   | -156.29(16) |
| C(1)-O(1)-B(1)-C(13)   | 75.1(2)     |
| C(1)-O(1)-B(1)-N(1)    | -40.4(2)    |
| C(5)-N(1)-B(1)-O(1)    | -154.64(17) |
| C(3)-N(1)-B(1)-O(1)    | 33.9(2)     |
| C(5)-N(1)-B(1)-C(19)   | -39.3(2)    |
| C(3)-N(1)-B(1)-C(19)   | 149.20(17)  |
| C(5)-N(1)-B(1)-C(13)   | 87.0(2)     |
| C(3)-N(1)-B(1)-C(13)   | -84.46(19)  |

|                         |             |
|-------------------------|-------------|
| O(1)-B(1)-C(13)-C(18)   | -161.59(18) |
| C(19)-B(1)-C(13)-C(18)  | 74.2(2)     |
| N(1)-B(1)-C(13)-C(18)   | -47.8(2)    |
| O(1)-B(1)-C(13)-C(14)   | 22.8(2)     |
| C(19)-B(1)-C(13)-C(14)  | -101.4(2)   |
| N(1)-B(1)-C(13)-C(14)   | 136.65(17)  |
| C(18)-C(13)-C(14)-C(15) | 0.9(3)      |
| B(1)-C(13)-C(14)-C(15)  | 176.79(19)  |
| C(13)-C(14)-C(15)-C(16) | -0.8(3)     |
| C(14)-C(15)-C(16)-C(17) | 0.3(4)      |
| C(15)-C(16)-C(17)-C(18) | 0.1(4)      |
| C(16)-C(17)-C(18)-C(13) | 0.0(4)      |
| C(14)-C(13)-C(18)-C(17) | -0.5(3)     |
| B(1)-C(13)-C(18)-C(17)  | -176.3(2)   |
| O(1)-B(1)-C(19)-C(20)   | -129.8(2)   |
| C(13)-B(1)-C(19)-C(20)  | -3.9(3)     |
| N(1)-B(1)-C(19)-C(20)   | 117.2(2)    |
| O(1)-B(1)-C(19)-C(24)   | 49.6(2)     |
| C(13)-B(1)-C(19)-C(24)  | 175.50(17)  |
| N(1)-B(1)-C(19)-C(24)   | -63.4(2)    |
| C(24)-C(19)-C(20)-C(21) | -0.4(3)     |
| B(1)-C(19)-C(20)-C(21)  | 179.0(2)    |
| C(19)-C(20)-C(21)-C(22) | -0.4(4)     |
| C(20)-C(21)-C(22)-C(23) | 1.3(5)      |
| C(21)-C(22)-C(23)-C(24) | -1.3(4)     |
| C(22)-C(23)-C(24)-C(19) | 0.5(4)      |
| C(20)-C(19)-C(24)-C(23) | 0.3(3)      |
| B(1)-C(19)-C(24)-C(23)  | -179.07(19) |
| C(10)-C(9)-C(25)-N(3)   | -150(8)     |
| C(8)-C(9)-C(25)-N(3)    | 30(9)       |

---

Symmetry transformations used to generate equivalent atoms:

**Table S25.** Crystal data and structure refinement for **14**.

---

|                     |                                                                    |
|---------------------|--------------------------------------------------------------------|
| Identification code | 14                                                                 |
| Empirical formula   | C <sub>25</sub> H <sub>20</sub> B Cl N <sub>2</sub> O <sub>2</sub> |
| Formula weight      | 426.69                                                             |
| Temperature         | 293(2) K                                                           |

|                                   |                                             |                               |
|-----------------------------------|---------------------------------------------|-------------------------------|
| Wavelength                        | 0.71075 Å                                   |                               |
| Crystal system                    | Monoclinic                                  |                               |
| Space group                       | P 21/c                                      |                               |
| Unit cell dimensions              | a = 10.102(2) Å                             | $\alpha = 90^\circ$ .         |
|                                   | b = 20.037(4) Å                             | $\beta = 92.7166(10)^\circ$ . |
|                                   | c = 10.665(2) Å                             | $\gamma = 90^\circ$ .         |
| Volume                            | 2156.3(7) Å <sup>3</sup>                    |                               |
| Z                                 | 4                                           |                               |
| Density (calculated)              | 1.314 Mg/m <sup>3</sup>                     |                               |
| Absorption coefficient            | 0.202 mm <sup>-1</sup>                      |                               |
| F(000)                            | 888                                         |                               |
| Crystal size                      | 0.20 x 0.20 x 0.20 mm <sup>3</sup>          |                               |
| Theta range for data collection   | 2.79 to 27.66°.                             |                               |
| Index ranges                      | -13<=h<=13, -26<=k<=26, -13<=l<=13          |                               |
| Reflections collected             | 21280                                       |                               |
| Independent reflections           | 4931 [R(int) = 0.0728]                      |                               |
| Completeness to theta = 27.66°    | 98.2 %                                      |                               |
| Absorption correction             | Integration                                 |                               |
| Max. and min. transmission        | 0.9607 and 0.9607                           |                               |
| Refinement method                 | Full-matrix least-squares on F <sup>2</sup> |                               |
| Data / restraints / parameters    | 4931 / 0 / 281                              |                               |
| Goodness-of-fit on F <sup>2</sup> | 1.024                                       |                               |
| Final R indices [I>2sigma(I)]     | R1 = 0.0572, wR2 = 0.1527                   |                               |
| R indices (all data)              | R1 = 0.0701, wR2 = 0.1682                   |                               |
| Largest diff. peak and hole       | 0.527 and -0.274 e.Å <sup>-3</sup>          |                               |

**Table S26.** Atomic coordinates ( $\times 10^4$ ) and equivalent isotropic displacement parameters ( $\text{Å}^2 \times 10^3$ ) for **14**.  $U(\text{eq})$  is defined as one third of the trace of the orthogonalized  $U^{ij}$  tensor.

|      | x       | y        | z       | U(eq) |
|------|---------|----------|---------|-------|
| C(1) | 487(2)  | 10703(1) | 7218(2) | 41(1) |
| C(2) | 811(2)  | 10193(1) | 6443(2) | 47(1) |
| C(3) | 1844(2) | 10256(1) | 5595(2) | 42(1) |
| C(4) | 2366(2) | 9709(1)  | 4959(2) | 49(1) |
| C(5) | 3392(2) | 10916(1) | 4615(2) | 48(1) |
| C(6) | -477(2) | 10648(1) | 8210(2) | 46(1) |
| C(7) | -885(2) | 11219(1) | 8835(2) | 57(1) |

|       |          |          |          |       |
|-------|----------|----------|----------|-------|
| C(8)  | -1828(3) | 11187(1) | 9732(2)  | 67(1) |
| C(9)  | -2368(2) | 10583(1) | 10051(2) | 63(1) |
| C(10) | -1958(2) | 10009(1) | 9473(2)  | 65(1) |
| C(11) | -1021(2) | 10042(1) | 8546(2)  | 57(1) |
| C(12) | 3356(2)  | 9826(1)  | 4170(2)  | 49(1) |
| C(13) | 466(2)   | 11706(1) | 4899(2)  | 43(1) |
| C(14) | -807(2)  | 11869(1) | 5259(2)  | 49(1) |
| C(15) | -1817(2) | 12023(1) | 4382(3)  | 63(1) |
| C(16) | -1573(3) | 12020(1) | 3123(3)  | 70(1) |
| C(17) | -326(3)  | 11874(1) | 2733(2)  | 69(1) |
| C(18) | 670(2)   | 11718(1) | 3613(2)  | 57(1) |
| C(19) | 2700(2)  | 12098(1) | 6266(2)  | 44(1) |
| C(20) | 2805(3)  | 12682(1) | 5587(3)  | 66(1) |
| C(21) | 3770(3)  | 13158(1) | 5911(3)  | 83(1) |
| C(22) | 4625(3)  | 13064(1) | 6919(3)  | 77(1) |
| C(23) | 4533(3)  | 12492(1) | 7621(3)  | 72(1) |
| C(24) | 3581(2)  | 12017(1) | 7289(2)  | 57(1) |
| C(25) | -3809(3) | 10015(2) | 11416(3) | 82(1) |
| N(1)  | 2381(1)  | 10870(1) | 5388(1)  | 40(1) |
| N(2)  | 3911(2)  | 10424(1) | 3976(2)  | 53(1) |
| O(1)  | 1053(1)  | 11296(1) | 7128(1)  | 44(1) |
| O(2)  | -3293(2) | 10612(1) | 10955(2) | 88(1) |
| Cl(1) | 3987(1)  | 9164(1)  | 3344(1)  | 67(1) |
| B(1)  | 1630(2)  | 11519(1) | 5934(2)  | 40(1) |

---

**Table S27.** Bond lengths [Å] and angles [°] for **14**.

|            |          |
|------------|----------|
| C(1)-O(1)  | 1.325(2) |
| C(1)-C(2)  | 1.364(3) |
| C(1)-C(6)  | 1.476(3) |
| C(2)-C(3)  | 1.419(3) |
| C(3)-N(1)  | 1.366(2) |
| C(3)-C(4)  | 1.405(3) |
| C(4)-C(12) | 1.358(3) |
| C(5)-N(2)  | 1.320(2) |
| C(5)-N(1)  | 1.346(2) |
| C(6)-C(11) | 1.386(3) |
| C(6)-C(7)  | 1.396(3) |

|             |            |
|-------------|------------|
| C(7)-C(8)   | 1.383(3)   |
| C(8)-C(9)   | 1.376(4)   |
| C(9)-O(2)   | 1.375(3)   |
| C(9)-C(10)  | 1.378(4)   |
| C(10)-C(11) | 1.402(3)   |
| C(12)-N(2)  | 1.344(3)   |
| C(12)-Cl(1) | 1.7293(19) |
| C(13)-C(18) | 1.397(3)   |
| C(13)-C(14) | 1.398(3)   |
| C(13)-B(1)  | 1.618(3)   |
| C(14)-C(15) | 1.386(3)   |
| C(15)-C(16) | 1.376(4)   |
| C(16)-C(17) | 1.377(4)   |
| C(17)-C(18) | 1.378(3)   |
| C(19)-C(20) | 1.384(3)   |
| C(19)-C(24) | 1.385(3)   |
| C(19)-B(1)  | 1.613(3)   |
| C(20)-C(21) | 1.395(3)   |
| C(21)-C(22) | 1.360(4)   |
| C(22)-C(23) | 1.374(4)   |
| C(23)-C(24) | 1.386(3)   |
| C(25)-O(2)  | 1.402(3)   |
| N(1)-B(1)   | 1.627(2)   |
| O(1)-B(1)   | 1.494(2)   |

|                 |            |
|-----------------|------------|
| O(1)-C(1)-C(2)  | 120.82(16) |
| O(1)-C(1)-C(6)  | 114.84(16) |
| C(2)-C(1)-C(6)  | 124.34(16) |
| C(1)-C(2)-C(3)  | 121.57(16) |
| N(1)-C(3)-C(4)  | 117.61(17) |
| N(1)-C(3)-C(2)  | 119.60(16) |
| C(4)-C(3)-C(2)  | 122.79(17) |
| C(12)-C(4)-C(3) | 117.98(17) |
| N(2)-C(5)-N(1)  | 126.63(18) |
| C(11)-C(6)-C(7) | 117.64(18) |
| C(11)-C(6)-C(1) | 122.27(18) |
| C(7)-C(6)-C(1)  | 120.09(17) |
| C(8)-C(7)-C(6)  | 121.4(2)   |
| C(9)-C(8)-C(7)  | 120.4(2)   |
| O(2)-C(9)-C(8)  | 115.3(2)   |

|                   |            |
|-------------------|------------|
| O(2)-C(9)-C(10)   | 125.3(2)   |
| C(8)-C(9)-C(10)   | 119.4(2)   |
| C(9)-C(10)-C(11)  | 120.3(2)   |
| C(6)-C(11)-C(10)  | 120.8(2)   |
| N(2)-C(12)-C(4)   | 125.02(17) |
| N(2)-C(12)-Cl(1)  | 116.04(15) |
| C(4)-C(12)-Cl(1)  | 118.93(15) |
| C(18)-C(13)-C(14) | 116.49(18) |
| C(18)-C(13)-B(1)  | 122.54(17) |
| C(14)-C(13)-B(1)  | 120.97(17) |
| C(15)-C(14)-C(13) | 121.6(2)   |
| C(16)-C(15)-C(14) | 119.8(2)   |
| C(15)-C(16)-C(17) | 120.3(2)   |
| C(16)-C(17)-C(18) | 119.4(2)   |
| C(17)-C(18)-C(13) | 122.4(2)   |
| C(20)-C(19)-C(24) | 116.64(19) |
| C(20)-C(19)-B(1)  | 124.07(18) |
| C(24)-C(19)-B(1)  | 119.29(17) |
| C(19)-C(20)-C(21) | 121.2(2)   |
| C(22)-C(21)-C(20) | 120.8(3)   |
| C(21)-C(22)-C(23) | 119.3(2)   |
| C(22)-C(23)-C(24) | 119.8(3)   |
| C(19)-C(24)-C(23) | 122.2(2)   |
| C(5)-N(1)-C(3)    | 118.62(15) |
| C(5)-N(1)-B(1)    | 123.01(14) |
| C(3)-N(1)-B(1)    | 117.79(14) |
| C(5)-N(2)-C(12)   | 114.06(17) |
| C(1)-O(1)-B(1)    | 121.09(14) |
| C(9)-O(2)-C(25)   | 119.1(2)   |
| O(1)-B(1)-C(19)   | 108.14(15) |
| O(1)-B(1)-C(13)   | 110.54(15) |
| C(19)-B(1)-C(13)  | 116.16(15) |
| O(1)-B(1)-N(1)    | 105.87(13) |
| C(19)-B(1)-N(1)   | 109.52(14) |
| C(13)-B(1)-N(1)   | 106.12(14) |

---

Symmetry transformations used to generate equivalent atoms:

**Table S28.** Anisotropic displacement parameters ( $\text{\AA}^2 \times 10^3$ ) for **14**. The anisotropic

displacement factor exponent takes the form:  $-2\pi^2[ h^2a^*2U^{11} + \dots + 2 h k a^* b^* U^{12} ]$

|       | U <sup>11</sup> | U <sup>22</sup> | U <sup>33</sup> | U <sup>23</sup> | U <sup>13</sup> | U <sup>12</sup> |
|-------|-----------------|-----------------|-----------------|-----------------|-----------------|-----------------|
| C(1)  | 38(1)           | 43(1)           | 43(1)           | 5(1)            | -1(1)           | -4(1)           |
| C(2)  | 44(1)           | 41(1)           | 57(1)           | 1(1)            | 5(1)            | -7(1)           |
| C(3)  | 37(1)           | 38(1)           | 49(1)           | -2(1)           | -1(1)           | -1(1)           |
| C(4)  | 46(1)           | 41(1)           | 61(1)           | -7(1)           | 3(1)            | -2(1)           |
| C(5)  | 45(1)           | 45(1)           | 56(1)           | 0(1)            | 7(1)            | -1(1)           |
| C(6)  | 42(1)           | 54(1)           | 42(1)           | 6(1)            | 2(1)            | -5(1)           |
| C(7)  | 63(1)           | 58(1)           | 51(1)           | -1(1)           | 14(1)           | -7(1)           |
| C(8)  | 77(2)           | 67(1)           | 59(1)           | -7(1)           | 24(1)           | -5(1)           |
| C(9)  | 66(1)           | 73(1)           | 51(1)           | 4(1)            | 17(1)           | -5(1)           |
| C(10) | 61(1)           | 63(1)           | 72(1)           | 19(1)           | 12(1)           | -13(1)          |
| C(11) | 58(1)           | 55(1)           | 58(1)           | 7(1)            | 10(1)           | -5(1)           |
| C(12) | 42(1)           | 49(1)           | 54(1)           | -9(1)           | -3(1)           | 7(1)            |
| C(13) | 43(1)           | 34(1)           | 52(1)           | 0(1)            | 1(1)            | -2(1)           |
| C(14) | 46(1)           | 41(1)           | 62(1)           | -1(1)           | 2(1)            | -2(1)           |
| C(15) | 44(1)           | 51(1)           | 94(2)           | 10(1)           | -6(1)           | 3(1)            |
| C(16) | 64(1)           | 65(1)           | 79(2)           | 14(1)           | -22(1)          | 1(1)            |
| C(17) | 76(2)           | 73(2)           | 56(1)           | 9(1)            | -9(1)           | 5(1)            |
| C(18) | 56(1)           | 61(1)           | 54(1)           | 4(1)            | 1(1)            | 7(1)            |
| C(19) | 41(1)           | 39(1)           | 53(1)           | -7(1)           | 8(1)            | -2(1)           |
| C(20) | 69(1)           | 50(1)           | 79(2)           | 8(1)            | -2(1)           | -13(1)          |
| C(21) | 85(2)           | 48(1)           | 116(2)          | 8(1)            | 6(2)            | -23(1)          |
| C(22) | 62(1)           | 62(1)           | 106(2)          | -21(1)          | 5(1)            | -22(1)          |
| C(23) | 59(1)           | 75(2)           | 82(2)           | -15(1)          | -9(1)           | -14(1)          |
| C(24) | 54(1)           | 53(1)           | 64(1)           | -4(1)           | -4(1)           | -9(1)           |
| C(25) | 75(2)           | 103(2)          | 69(2)           | 13(1)           | 26(1)           | -12(2)          |
| N(1)  | 37(1)           | 37(1)           | 45(1)           | 0(1)            | 1(1)            | -1(1)           |
| N(2)  | 46(1)           | 53(1)           | 59(1)           | -6(1)           | 10(1)           | 2(1)            |
| O(1)  | 46(1)           | 42(1)           | 46(1)           | -2(1)           | 7(1)            | -6(1)           |
| O(2)  | 97(1)           | 81(1)           | 90(1)           | 1(1)            | 49(1)           | -4(1)           |
| Cl(1) | 64(1)           | 60(1)           | 77(1)           | -21(1)          | 12(1)           | 9(1)            |
| B(1)  | 38(1)           | 37(1)           | 45(1)           | 1(1)            | 4(1)            | -2(1)           |

**Table S29.** Hydrogen coordinates ( x 10<sup>4</sup>) and isotropic displacement parameters (Å<sup>2</sup>x 10<sup>3</sup>) for **14**.

|        | x     | y     | z     | U(eq) |
|--------|-------|-------|-------|-------|
| H(2)   | 344   | 9793  | 6472  | 57    |
| H(4)   | 2044  | 9280  | 5076  | 59    |
| H(5)   | 3763  | 11337 | 4521  | 58    |
| H(7)   | -515  | 11629 | 8645  | 69    |
| H(8)   | -2099 | 11575 | 10122 | 80    |
| H(10)  | -2304 | 9599  | 9697  | 78    |
| H(11)  | -761  | 9653  | 8152  | 68    |
| H(14)  | -980  | 11874 | 6108  | 59    |
| H(15)  | -2657 | 12128 | 4644  | 76    |
| H(16)  | -2254 | 12117 | 2534  | 84    |
| H(17)  | -158  | 11879 | 1883  | 82    |
| H(18)  | 1507  | 11618 | 3340  | 68    |
| H(20)  | 2221  | 12760 | 4902  | 79    |
| H(21)  | 3830  | 13544 | 5432  | 100   |
| H(22)  | 5265  | 13384 | 7132  | 92    |
| H(23)  | 5108  | 12424 | 8316  | 87    |
| H(24)  | 3534  | 11632 | 7770  | 69    |
| H(25)  | -4410 | 9823  | 10792 | 123   |
| H(25A) | -4272 | 10106 | 12163 | 123   |
| H(25B) | -3097 | 9709  | 11607 | 123   |

**Table S30.** Torsion angles [ $^{\circ}$ ] for **14**.

|                      |             |
|----------------------|-------------|
| O(1)-C(1)-C(2)-C(3)  | 5.8(3)      |
| C(6)-C(1)-C(2)-C(3)  | -173.36(17) |
| C(1)-C(2)-C(3)-N(1)  | -11.2(3)    |
| C(1)-C(2)-C(3)-C(4)  | 167.81(18)  |
| N(1)-C(3)-C(4)-C(12) | -0.9(3)     |
| C(2)-C(3)-C(4)-C(12) | -179.89(18) |
| O(1)-C(1)-C(6)-C(11) | -170.94(17) |
| C(2)-C(1)-C(6)-C(11) | 8.2(3)      |
| O(1)-C(1)-C(6)-C(7)  | 9.9(3)      |
| C(2)-C(1)-C(6)-C(7)  | -170.89(19) |
| C(11)-C(6)-C(7)-C(8) | -1.9(3)     |



|                         |             |
|-------------------------|-------------|
| C(1)-C(6)-C(7)-C(8)     | 177.2(2)    |
| C(6)-C(7)-C(8)-C(9)     | 1.5(4)      |
| C(7)-C(8)-C(9)-O(2)     | 179.8(2)    |
| C(7)-C(8)-C(9)-C(10)    | 0.2(4)      |
| O(2)-C(9)-C(10)-C(11)   | 179.0(2)    |
| C(8)-C(9)-C(10)-C(11)   | -1.5(4)     |
| C(7)-C(6)-C(11)-C(10)   | 0.7(3)      |
| C(1)-C(6)-C(11)-C(10)   | -178.47(19) |
| C(9)-C(10)-C(11)-C(6)   | 1.0(4)      |
| C(3)-C(4)-C(12)-N(2)    | 2.3(3)      |
| C(3)-C(4)-C(12)-Cl(1)   | -178.32(14) |
| C(18)-C(13)-C(14)-C(15) | 1.0(3)      |
| B(1)-C(13)-C(14)-C(15)  | -179.25(17) |
| C(13)-C(14)-C(15)-C(16) | -0.2(3)     |
| C(14)-C(15)-C(16)-C(17) | -0.9(4)     |
| C(15)-C(16)-C(17)-C(18) | 1.2(4)      |
| C(16)-C(17)-C(18)-C(13) | -0.3(4)     |
| C(14)-C(13)-C(18)-C(17) | -0.7(3)     |
| B(1)-C(13)-C(18)-C(17)  | 179.5(2)    |
| C(24)-C(19)-C(20)-C(21) | 1.2(4)      |
| B(1)-C(19)-C(20)-C(21)  | -178.8(2)   |
| C(19)-C(20)-C(21)-C(22) | -1.0(5)     |
| C(20)-C(21)-C(22)-C(23) | 0.2(5)      |
| C(21)-C(22)-C(23)-C(24) | 0.5(4)      |
| C(20)-C(19)-C(24)-C(23) | -0.5(3)     |
| B(1)-C(19)-C(24)-C(23)  | 179.4(2)    |
| C(22)-C(23)-C(24)-C(19) | -0.3(4)     |
| N(2)-C(5)-N(1)-C(3)     | 2.7(3)      |
| N(2)-C(5)-N(1)-B(1)     | -168.34(18) |
| C(4)-C(3)-N(1)-C(5)     | -1.4(3)     |
| C(2)-C(3)-N(1)-C(5)     | 177.64(17)  |
| C(4)-C(3)-N(1)-B(1)     | 170.13(16)  |
| C(2)-C(3)-N(1)-B(1)     | -10.8(2)    |
| N(1)-C(5)-N(2)-C(12)    | -1.4(3)     |
| C(4)-C(12)-N(2)-C(5)    | -1.2(3)     |
| Cl(1)-C(12)-N(2)-C(5)   | 179.40(14)  |
| C(2)-C(1)-O(1)-B(1)     | 24.0(2)     |
| C(6)-C(1)-O(1)-B(1)     | -156.79(15) |
| C(8)-C(9)-O(2)-C(25)    | -174.5(2)   |
| C(10)-C(9)-O(2)-C(25)   | 5.1(4)      |

|                        |             |
|------------------------|-------------|
| C(1)-O(1)-B(1)-C(19)   | -158.17(15) |
| C(1)-O(1)-B(1)-C(13)   | 73.64(19)   |
| C(1)-O(1)-B(1)-N(1)    | -40.9(2)    |
| C(20)-C(19)-B(1)-O(1)  | -136.1(2)   |
| C(24)-C(19)-B(1)-O(1)  | 44.0(2)     |
| C(20)-C(19)-B(1)-C(13) | -11.2(3)    |
| C(24)-C(19)-B(1)-C(13) | 168.87(18)  |
| C(20)-C(19)-B(1)-N(1)  | 109.0(2)    |
| C(24)-C(19)-B(1)-N(1)  | -71.0(2)    |
| C(18)-C(13)-B(1)-O(1)  | -158.65(17) |
| C(14)-C(13)-B(1)-O(1)  | 21.6(2)     |
| C(18)-C(13)-B(1)-C(19) | 77.7(2)     |
| C(14)-C(13)-B(1)-C(19) | -102.04(19) |
| C(18)-C(13)-B(1)-N(1)  | -44.3(2)    |
| C(14)-C(13)-B(1)-N(1)  | 135.99(16)  |
| C(5)-N(1)-B(1)-O(1)    | -155.15(16) |
| C(3)-N(1)-B(1)-O(1)    | 33.7(2)     |
| C(5)-N(1)-B(1)-C(19)   | -38.8(2)    |
| C(3)-N(1)-B(1)-C(19)   | 150.08(15)  |
| C(5)-N(1)-B(1)-C(13)   | 87.34(19)   |
| C(3)-N(1)-B(1)-C(13)   | -83.81(18)  |

---

Symmetry transformations used to generate equivalent atoms:

**Table S31.** Crystal data and structure refinement for **15**.

---

|                      |                                                       |                  |
|----------------------|-------------------------------------------------------|------------------|
| Identification code  | 15                                                    |                  |
| Empirical formula    | C <sub>26</sub> H <sub>23</sub> B Cl N <sub>3</sub> O |                  |
| Formula weight       | 439.73                                                |                  |
| Temperature          | 293(2) K                                              |                  |
| Wavelength           | 0.71075 Å                                             |                  |
| Crystal system       | Monoclinic                                            |                  |
| Space group          | P21/n                                                 |                  |
| Unit cell dimensions | a = 8.885(8) Å                                        | α = 90°.         |
|                      | b = 12.288(11) Å                                      | β = 97.033(12)°. |
|                      | c = 20.917(19) Å                                      | γ = 90°.         |
| Volume               | 2267(4) Å <sup>3</sup>                                |                  |
| Z                    | 4                                                     |                  |
| Density (calculated) | 1.289 Mg/m <sup>3</sup>                               |                  |

|                                   |                                             |
|-----------------------------------|---------------------------------------------|
| Absorption coefficient            | 0.192 mm <sup>-1</sup>                      |
| F(000)                            | 920                                         |
| Crystal size                      | 0.20 x 0.20 x 0.20 mm <sup>3</sup>          |
| Theta range for data collection   | 2.62 to 27.48°.                             |
| Index ranges                      | -11<=h<=11, -15<=k<=15, -27<=l<=26          |
| Reflections collected             | 21423                                       |
| Independent reflections           | 5132 [R(int) = 0.0409]                      |
| Completeness to theta = 27.48°    | 98.8 %                                      |
| Absorption correction             | Integration                                 |
| Max. and min. transmission        | 0.9626 and 0.9626                           |
| Refinement method                 | Full-matrix least-squares on F <sup>2</sup> |
| Data / restraints / parameters    | 5132 / 0 / 291                              |
| Goodness-of-fit on F <sup>2</sup> | 1.074                                       |
| Final R indices [I>2sigma(I)]     | R1 = 0.0534, wR2 = 0.1247                   |
| R indices (all data)              | R1 = 0.0752, wR2 = 0.1370                   |
| Largest diff. peak and hole       | 0.153 and -0.187 e.Å <sup>-3</sup>          |

**Table S32.** Atomic coordinates (x 10<sup>4</sup>) and equivalent isotropic displacement parameters (Å<sup>2</sup>x 10<sup>3</sup>) for **15**. U(eq) is defined as one third of the trace of the orthogonalized U<sup>ij</sup> tensor.

|       | x        | y        | z        | U(eq) |
|-------|----------|----------|----------|-------|
| C(1)  | 9588(2)  | 11730(1) | 10831(1) | 47(1) |
| C(2)  | 9054(2)  | 11114(2) | 10307(1) | 49(1) |
| C(3)  | 8035(2)  | 10251(1) | 10349(1) | 45(1) |
| C(4)  | 7238(2)  | 9742(2)  | 9809(1)  | 49(1) |
| C(5)  | 6759(2)  | 9088(2)  | 10982(1) | 57(1) |
| C(6)  | 10534(2) | 12694(1) | 10790(1) | 48(1) |
| C(7)  | 11356(2) | 13141(2) | 11338(1) | 55(1) |
| C(8)  | 12299(2) | 14018(2) | 11307(1) | 59(1) |
| C(9)  | 12445(2) | 14533(2) | 10721(1) | 54(1) |
| C(10) | 11618(3) | 14086(2) | 10168(1) | 65(1) |
| C(11) | 10703(2) | 13196(2) | 10205(1) | 60(1) |
| C(12) | 6267(2)  | 8924(2)  | 9914(1)  | 51(1) |
| C(19) | 8021(2)  | 10279(2) | 12194(1) | 52(1) |
| C(24) | 7219(3)  | 11162(2) | 12372(1) | 70(1) |
| C(23) | 6405(3)  | 11125(2) | 12904(1) | 88(1) |
| C(22) | 6354(3)  | 10192(2) | 13253(1) | 80(1) |

|       |          |          |          |       |
|-------|----------|----------|----------|-------|
| C(21) | 7130(3)  | 9304(2)  | 13091(1) | 79(1) |
| C(20) | 7963(3)  | 9352(2)  | 12568(1) | 69(1) |
| C(13) | 10444(2) | 9608(2)  | 11619(1) | 48(1) |
| C(14) | 11811(2) | 10063(2) | 11894(1) | 60(1) |
| C(15) | 13155(2) | 9472(2)  | 11974(1) | 70(1) |
| C(16) | 13168(2) | 8411(2)  | 11789(1) | 71(1) |
| C(17) | 11844(2) | 7935(2)  | 11514(1) | 67(1) |
| C(18) | 10510(2) | 8526(2)  | 11430(1) | 54(1) |
| C(25) | 13416(3) | 16003(2) | 10084(1) | 84(1) |
| C(26) | 14415(3) | 15747(2) | 11229(1) | 85(1) |
| N(1)  | 7795(2)  | 9875(1)  | 10947(1) | 46(1) |
| N(2)  | 5979(2)  | 8582(1)  | 10497(1) | 58(1) |
| N(3)  | 13343(2) | 15433(2) | 10685(1) | 72(1) |
| O(1)  | 9254(2)  | 11476(1) | 11414(1) | 53(1) |
| Cl(1) | 5276(1)  | 8267(1)  | 9266(1)  | 69(1) |
| B(1)  | 8901(2)  | 10317(2) | 11561(1) | 49(1) |

---

**Table S33.** Bond lengths [Å] and angles [°] for **15**.

|            |          |
|------------|----------|
| C(1)-O(1)  | 1.328(2) |
| C(1)-C(2)  | 1.368(3) |
| C(1)-C(6)  | 1.461(3) |
| C(2)-C(3)  | 1.404(3) |
| C(2)-H(2)  | 0.9300   |
| C(3)-N(1)  | 1.373(2) |
| C(3)-C(4)  | 1.404(3) |
| C(4)-C(12) | 1.359(3) |
| C(4)-H(4)  | 0.9300   |
| C(5)-N(2)  | 1.312(3) |
| C(5)-N(1)  | 1.344(2) |
| C(5)-H(5)  | 0.9300   |
| C(6)-C(7)  | 1.394(3) |
| C(6)-C(11) | 1.396(3) |
| C(7)-C(8)  | 1.372(3) |
| C(7)-H(7)  | 0.9300   |
| C(8)-C(9)  | 1.399(3) |
| C(8)-H(8)  | 0.9300   |
| C(9)-N(3)  | 1.372(3) |

|              |          |
|--------------|----------|
| C(9)-C(10)   | 1.404(3) |
| C(10)-C(11)  | 1.370(3) |
| C(10)-H(10)  | 0.9300   |
| C(11)-H(11)  | 0.9300   |
| C(12)-N(2)   | 1.344(3) |
| C(12)-Cl(1)  | 1.724(2) |
| C(19)-C(24)  | 1.375(3) |
| C(19)-C(20)  | 1.387(3) |
| C(19)-B(1)   | 1.619(3) |
| C(24)-C(23)  | 1.400(3) |
| C(24)-H(24)  | 0.9300   |
| C(23)-C(22)  | 1.363(4) |
| C(23)-H(23)  | 0.9300   |
| C(22)-C(21)  | 1.356(4) |
| C(22)-H(22)  | 0.9300   |
| C(21)-C(20)  | 1.394(3) |
| C(21)-H(21)  | 0.9300   |
| C(20)-H(20)  | 0.9300   |
| C(13)-C(18)  | 1.390(3) |
| C(13)-C(14)  | 1.395(3) |
| C(13)-B(1)   | 1.616(3) |
| C(14)-C(15)  | 1.389(3) |
| C(14)-H(14)  | 0.9300   |
| C(15)-C(16)  | 1.360(4) |
| C(15)-H(15)  | 0.9300   |
| C(16)-C(17)  | 1.375(3) |
| C(16)-H(16)  | 0.9300   |
| C(17)-C(18)  | 1.383(3) |
| C(17)-H(17)  | 0.9300   |
| C(18)-H(18)  | 0.9300   |
| C(25)-N(3)   | 1.447(3) |
| C(25)-H(25)  | 0.9600   |
| C(25)-H(25A) | 0.9600   |
| C(25)-H(25B) | 0.9600   |
| C(26)-N(3)   | 1.445(3) |
| C(26)-H(26)  | 0.9600   |
| C(26)-H(26A) | 0.9600   |
| C(26)-H(26B) | 0.9600   |
| N(1)-B(1)    | 1.613(3) |
| O(1)-B(1)    | 1.498(3) |

|                   |            |
|-------------------|------------|
| O(1)-C(1)-C(2)    | 120.75(17) |
| O(1)-C(1)-C(6)    | 115.99(16) |
| C(2)-C(1)-C(6)    | 123.26(16) |
| C(1)-C(2)-C(3)    | 122.06(16) |
| C(1)-C(2)-H(2)    | 119.0      |
| C(3)-C(2)-H(2)    | 119.0      |
| N(1)-C(3)-C(2)    | 118.97(16) |
| N(1)-C(3)-C(4)    | 117.59(17) |
| C(2)-C(3)-C(4)    | 123.44(16) |
| C(12)-C(4)-C(3)   | 117.84(17) |
| C(12)-C(4)-H(4)   | 121.1      |
| C(3)-C(4)-H(4)    | 121.1      |
| N(2)-C(5)-N(1)    | 126.74(18) |
| N(2)-C(5)-H(5)    | 116.6      |
| N(1)-C(5)-H(5)    | 116.6      |
| C(7)-C(6)-C(11)   | 116.41(18) |
| C(7)-C(6)-C(1)    | 121.29(17) |
| C(11)-C(6)-C(1)   | 122.26(18) |
| C(8)-C(7)-C(6)    | 122.14(18) |
| C(8)-C(7)-H(7)    | 118.9      |
| C(6)-C(7)-H(7)    | 118.9      |
| C(7)-C(8)-C(9)    | 121.31(19) |
| C(7)-C(8)-H(8)    | 119.3      |
| C(9)-C(8)-H(8)    | 119.3      |
| N(3)-C(9)-C(8)    | 121.95(19) |
| N(3)-C(9)-C(10)   | 121.34(19) |
| C(8)-C(9)-C(10)   | 116.72(19) |
| C(11)-C(10)-C(9)  | 121.31(19) |
| C(11)-C(10)-H(10) | 119.3      |
| C(9)-C(10)-H(10)  | 119.3      |
| C(10)-C(11)-C(6)  | 122.1(2)   |
| C(10)-C(11)-H(11) | 119.0      |
| C(6)-C(11)-H(11)  | 119.0      |
| N(2)-C(12)-C(4)   | 124.90(17) |
| N(2)-C(12)-Cl(1)  | 115.55(15) |
| C(4)-C(12)-Cl(1)  | 119.54(15) |
| C(24)-C(19)-C(20) | 115.98(19) |
| C(24)-C(19)-B(1)  | 121.22(18) |
| C(20)-C(19)-B(1)  | 122.73(18) |

|                     |            |
|---------------------|------------|
| C(19)-C(24)-C(23)   | 121.8(2)   |
| C(19)-C(24)-H(24)   | 119.1      |
| C(23)-C(24)-H(24)   | 119.1      |
| C(22)-C(23)-C(24)   | 120.4(2)   |
| C(22)-C(23)-H(23)   | 119.8      |
| C(24)-C(23)-H(23)   | 119.8      |
| C(21)-C(22)-C(23)   | 119.5(2)   |
| C(21)-C(22)-H(22)   | 120.2      |
| C(23)-C(22)-H(22)   | 120.2      |
| C(22)-C(21)-C(20)   | 119.8(2)   |
| C(22)-C(21)-H(21)   | 120.1      |
| C(20)-C(21)-H(21)   | 120.1      |
| C(19)-C(20)-C(21)   | 122.5(2)   |
| C(19)-C(20)-H(20)   | 118.7      |
| C(21)-C(20)-H(20)   | 118.7      |
| C(18)-C(13)-C(14)   | 115.78(18) |
| C(18)-C(13)-B(1)    | 123.97(17) |
| C(14)-C(13)-B(1)    | 120.21(18) |
| C(15)-C(14)-C(13)   | 122.2(2)   |
| C(15)-C(14)-H(14)   | 118.9      |
| C(13)-C(14)-H(14)   | 118.9      |
| C(16)-C(15)-C(14)   | 120.2(2)   |
| C(16)-C(15)-H(15)   | 119.9      |
| C(14)-C(15)-H(15)   | 119.9      |
| C(15)-C(16)-C(17)   | 119.3(2)   |
| C(15)-C(16)-H(16)   | 120.3      |
| C(17)-C(16)-H(16)   | 120.3      |
| C(16)-C(17)-C(18)   | 120.4(2)   |
| C(16)-C(17)-H(17)   | 119.8      |
| C(18)-C(17)-H(17)   | 119.8      |
| C(17)-C(18)-C(13)   | 122.1(2)   |
| C(17)-C(18)-H(18)   | 119.0      |
| C(13)-C(18)-H(18)   | 119.0      |
| N(3)-C(25)-H(25)    | 109.5      |
| N(3)-C(25)-H(25A)   | 109.5      |
| H(25)-C(25)-H(25A)  | 109.5      |
| N(3)-C(25)-H(25B)   | 109.5      |
| H(25)-C(25)-H(25B)  | 109.5      |
| H(25A)-C(25)-H(25B) | 109.5      |
| N(3)-C(26)-H(26)    | 109.5      |

|                     |            |
|---------------------|------------|
| N(3)-C(26)-H(26A)   | 109.5      |
| H(26)-C(26)-H(26A)  | 109.5      |
| N(3)-C(26)-H(26B)   | 109.5      |
| H(26)-C(26)-H(26B)  | 109.5      |
| H(26A)-C(26)-H(26B) | 109.5      |
| C(5)-N(1)-C(3)      | 118.41(16) |
| C(5)-N(1)-B(1)      | 123.58(15) |
| C(3)-N(1)-B(1)      | 117.67(15) |
| C(5)-N(2)-C(12)     | 114.38(17) |
| C(9)-N(3)-C(26)     | 120.3(2)   |
| C(9)-N(3)-C(25)     | 121.7(2)   |
| C(26)-N(3)-C(25)    | 117.4(2)   |
| C(1)-O(1)-B(1)      | 119.15(14) |
| O(1)-B(1)-N(1)      | 106.22(15) |
| O(1)-B(1)-C(13)     | 109.32(16) |
| N(1)-B(1)-C(13)     | 107.90(15) |
| O(1)-B(1)-C(19)     | 109.19(14) |
| N(1)-B(1)-C(19)     | 109.47(16) |
| C(13)-B(1)-C(19)    | 114.41(16) |

---

Symmetry transformations used to generate equivalent atoms:

**Table S34.** Anisotropic displacement parameters ( $\text{\AA}^2 \times 10^3$ ) for **15**. The anisotropic displacement factor exponent takes the form:  $-2\pi^2 [ h^2 a^{*2} U^{11} + \dots + 2 h k a^* b^* U^{12} ]$

|       | U <sup>11</sup> | U <sup>22</sup> | U <sup>33</sup> | U <sup>23</sup> | U <sup>13</sup> | U <sup>12</sup> |
|-------|-----------------|-----------------|-----------------|-----------------|-----------------|-----------------|
| C(1)  | 51(1)           | 46(1)           | 44(1)           | 2(1)            | 15(1)           | 6(1)            |
| C(2)  | 55(1)           | 52(1)           | 43(1)           | 2(1)            | 16(1)           | -1(1)           |
| C(3)  | 45(1)           | 48(1)           | 44(1)           | 1(1)            | 14(1)           | 6(1)            |
| C(4)  | 51(1)           | 54(1)           | 44(1)           | -1(1)           | 12(1)           | 2(1)            |
| C(5)  | 58(1)           | 61(1)           | 54(1)           | 5(1)            | 18(1)           | -4(1)           |
| C(6)  | 52(1)           | 43(1)           | 50(1)           | 2(1)            | 15(1)           | 4(1)            |
| C(7)  | 69(1)           | 53(1)           | 46(1)           | -1(1)           | 18(1)           | -2(1)           |
| C(8)  | 64(1)           | 58(1)           | 54(1)           | -9(1)           | 12(1)           | -3(1)           |
| C(9)  | 53(1)           | 48(1)           | 63(1)           | 0(1)            | 12(1)           | 2(1)            |
| C(10) | 78(1)           | 60(1)           | 56(1)           | 14(1)           | 7(1)            | -12(1)          |
| C(11) | 70(1)           | 58(1)           | 50(1)           | 6(1)            | 4(1)            | -9(1)           |
| C(12) | 43(1)           | 54(1)           | 56(1)           | -6(1)           | 7(1)            | 6(1)            |



|       |       |        |        |        |       |        |
|-------|-------|--------|--------|--------|-------|--------|
| C(19) | 56(1) | 58(1)  | 45(1)  | -6(1)  | 17(1) | -9(1)  |
| C(24) | 82(2) | 66(1)  | 69(1)  | -12(1) | 34(1) | -5(1)  |
| C(23) | 90(2) | 89(2)  | 93(2)  | -34(2) | 47(2) | -9(1)  |
| C(22) | 76(2) | 115(2) | 53(1)  | -25(1) | 31(1) | -34(1) |
| C(21) | 91(2) | 97(2)  | 54(1)  | 4(1)   | 29(1) | -20(1) |
| C(20) | 84(2) | 71(1)  | 57(1)  | 5(1)   | 29(1) | -4(1)  |
| C(13) | 54(1) | 55(1)  | 35(1)  | 5(1)   | 14(1) | -3(1)  |
| C(14) | 67(1) | 64(1)  | 48(1)  | -1(1)  | 6(1)  | -8(1)  |
| C(15) | 56(1) | 94(2)  | 59(1)  | 3(1)   | 1(1)  | -11(1) |
| C(16) | 57(1) | 82(2)  | 73(2)  | 9(1)   | 10(1) | 8(1)   |
| C(17) | 66(1) | 62(1)  | 76(1)  | 2(1)   | 17(1) | 6(1)   |
| C(18) | 54(1) | 55(1)  | 54(1)  | 2(1)   | 12(1) | -4(1)  |
| C(25) | 79(2) | 70(2)  | 105(2) | 24(1)  | 19(1) | -12(1) |
| C(26) | 67(1) | 74(2)  | 113(2) | -11(1) | 1(1)  | -12(1) |
| N(1)  | 48(1) | 49(1)  | 45(1)  | 0(1)   | 14(1) | 0(1)   |
| N(2)  | 55(1) | 65(1)  | 56(1)  | 0(1)   | 12(1) | -9(1)  |
| N(3)  | 70(1) | 61(1)  | 83(1)  | 5(1)   | 11(1) | -17(1) |
| O(1)  | 69(1) | 48(1)  | 44(1)  | -2(1)  | 21(1) | -4(1)  |
| Cl(1) | 65(1) | 76(1)  | 64(1)  | -13(1) | 3(1)  | -9(1)  |
| B(1)  | 60(1) | 48(1)  | 41(1)  | 1(1)   | 16(1) | -4(1)  |

**Table S35.** Hydrogen coordinates ( $\times 10^4$ ) and isotropic displacement parameters ( $\text{\AA}^2 \times 10^3$ ) for **15**.

|       | x     | y     | z     | U(eq) |
|-------|-------|-------|-------|-------|
| H(2)  | 9375  | 11271 | 9911  | 59    |
| H(4)  | 7371  | 9957  | 9394  | 59    |
| H(5)  | 6575  | 8879  | 11393 | 68    |
| H(7)  | 11261 | 12835 | 11738 | 66    |
| H(8)  | 12853 | 14276 | 11682 | 70    |
| H(10) | 11693 | 14399 | 9768  | 78    |
| H(11) | 10178 | 12918 | 9828  | 71    |
| H(24) | 7217  | 11800 | 12134 | 85    |
| H(23) | 5896  | 11742 | 13021 | 105   |
| H(22) | 5791  | 10164 | 13599 | 95    |
| H(21) | 7107  | 8664  | 13327 | 95    |

|        |       |       |       |     |
|--------|-------|-------|-------|-----|
| H(20)  | 8500  | 8739  | 12467 | 83  |
| H(14)  | 11824 | 10785 | 12027 | 71  |
| H(15)  | 14047 | 9803  | 12155 | 84  |
| H(16)  | 14064 | 8012  | 11848 | 85  |
| H(17)  | 11846 | 7211  | 11385 | 81  |
| H(18)  | 9629  | 8189  | 11241 | 65  |
| H(25)  | 12407 | 16149 | 9882  | 126 |
| H(25A) | 13939 | 15561 | 9804  | 126 |
| H(25B) | 13951 | 16677 | 10167 | 126 |
| H(26)  | 15109 | 15159 | 11341 | 128 |
| H(26A) | 13881 | 15912 | 11589 | 128 |
| H(26B) | 14968 | 16377 | 11119 | 128 |

---

**Table S36.** Torsion angles [°] for **15**.

|                         |             |
|-------------------------|-------------|
| O(1)-C(1)-C(2)-C(3)     | 5.5(3)      |
| C(6)-C(1)-C(2)-C(3)     | -174.02(16) |
| C(1)-C(2)-C(3)-N(1)     | -13.0(3)    |
| C(1)-C(2)-C(3)-C(4)     | 167.14(17)  |
| N(1)-C(3)-C(4)-C(12)    | 1.0(2)      |
| C(2)-C(3)-C(4)-C(12)    | -179.11(16) |
| O(1)-C(1)-C(6)-C(7)     | 16.4(2)     |
| C(2)-C(1)-C(6)-C(7)     | -164.07(18) |
| O(1)-C(1)-C(6)-C(11)    | -165.66(17) |
| C(2)-C(1)-C(6)-C(11)    | 13.9(3)     |
| C(11)-C(6)-C(7)-C(8)    | -0.9(3)     |
| C(1)-C(6)-C(7)-C(8)     | 177.19(17)  |
| C(6)-C(7)-C(8)-C(9)     | 2.1(3)      |
| C(7)-C(8)-C(9)-N(3)     | 177.70(18)  |
| C(7)-C(8)-C(9)-C(10)    | -2.0(3)     |
| N(3)-C(9)-C(10)-C(11)   | -179.0(2)   |
| C(8)-C(9)-C(10)-C(11)   | 0.7(3)      |
| C(9)-C(10)-C(11)-C(6)   | 0.5(3)      |
| C(7)-C(6)-C(11)-C(10)   | -0.4(3)     |
| C(1)-C(6)-C(11)-C(10)   | -178.47(19) |
| C(3)-C(4)-C(12)-N(2)    | 1.8(3)      |
| C(3)-C(4)-C(12)-Cl(1)   | -179.46(13) |
| C(20)-C(19)-C(24)-C(23) | 0.5(3)      |

|                         |             |
|-------------------------|-------------|
| B(1)-C(19)-C(24)-C(23)  | 177.5(2)    |
| C(19)-C(24)-C(23)-C(22) | -1.8(4)     |
| C(24)-C(23)-C(22)-C(21) | 1.7(4)      |
| C(23)-C(22)-C(21)-C(20) | -0.4(4)     |
| C(24)-C(19)-C(20)-C(21) | 0.8(3)      |
| B(1)-C(19)-C(20)-C(21)  | -176.1(2)   |
| C(22)-C(21)-C(20)-C(19) | -0.9(4)     |
| C(18)-C(13)-C(14)-C(15) | -0.1(3)     |
| B(1)-C(13)-C(14)-C(15)  | 177.67(17)  |
| C(13)-C(14)-C(15)-C(16) | -0.6(3)     |
| C(14)-C(15)-C(16)-C(17) | 0.8(3)      |
| C(15)-C(16)-C(17)-C(18) | -0.3(3)     |
| C(16)-C(17)-C(18)-C(13) | -0.4(3)     |
| C(14)-C(13)-C(18)-C(17) | 0.6(3)      |
| B(1)-C(13)-C(18)-C(17)  | -177.09(18) |
| N(2)-C(5)-N(1)-C(3)     | 3.7(3)      |
| N(2)-C(5)-N(1)-B(1)     | -169.49(18) |
| C(2)-C(3)-N(1)-C(5)     | 176.60(16)  |
| C(4)-C(3)-N(1)-C(5)     | -3.5(2)     |
| C(2)-C(3)-N(1)-B(1)     | -9.8(2)     |
| C(4)-C(3)-N(1)-B(1)     | 170.11(15)  |
| N(1)-C(5)-N(2)-C(12)    | -1.0(3)     |
| C(4)-C(12)-N(2)-C(5)    | -1.9(3)     |
| Cl(1)-C(12)-N(2)-C(5)   | 179.34(14)  |
| C(8)-C(9)-N(3)-C(26)    | 13.1(3)     |
| C(10)-C(9)-N(3)-C(26)   | -167.3(2)   |
| C(8)-C(9)-N(3)-C(25)    | -176.0(2)   |
| C(10)-C(9)-N(3)-C(25)   | 3.6(3)      |
| C(2)-C(1)-O(1)-B(1)     | 26.4(2)     |
| C(6)-C(1)-O(1)-B(1)     | -154.03(16) |
| C(1)-O(1)-B(1)-N(1)     | -43.7(2)    |
| C(1)-O(1)-B(1)-C(13)    | 72.5(2)     |
| C(1)-O(1)-B(1)-C(19)    | -161.69(16) |
| C(5)-N(1)-B(1)-O(1)     | -151.56(15) |
| C(3)-N(1)-B(1)-O(1)     | 35.2(2)     |
| C(5)-N(1)-B(1)-C(13)    | 91.31(19)   |
| C(3)-N(1)-B(1)-C(13)    | -81.97(19)  |
| C(5)-N(1)-B(1)-C(19)    | -33.8(2)    |
| C(3)-N(1)-B(1)-C(19)    | 152.94(15)  |
| C(18)-C(13)-B(1)-O(1)   | -146.02(17) |

|                        |             |
|------------------------|-------------|
| C(14)-C(13)-B(1)-O(1)  | 36.4(2)     |
| C(18)-C(13)-B(1)-N(1)  | -30.9(2)    |
| C(14)-C(13)-B(1)-N(1)  | 151.52(15)  |
| C(18)-C(13)-B(1)-C(19) | 91.2(2)     |
| C(14)-C(13)-B(1)-C(19) | -86.4(2)    |
| C(24)-C(19)-B(1)-O(1)  | 24.2(3)     |
| C(20)-C(19)-B(1)-O(1)  | -159.01(19) |
| C(24)-C(19)-B(1)-N(1)  | -91.7(2)    |
| C(20)-C(19)-B(1)-N(1)  | 85.1(2)     |
| C(24)-C(19)-B(1)-C(13) | 147.10(19)  |
| C(20)-C(19)-B(1)-C(13) | -36.1(3)    |

---

Symmetry transformations used to generate equivalent atoms:

### DFT calculation results of 6.

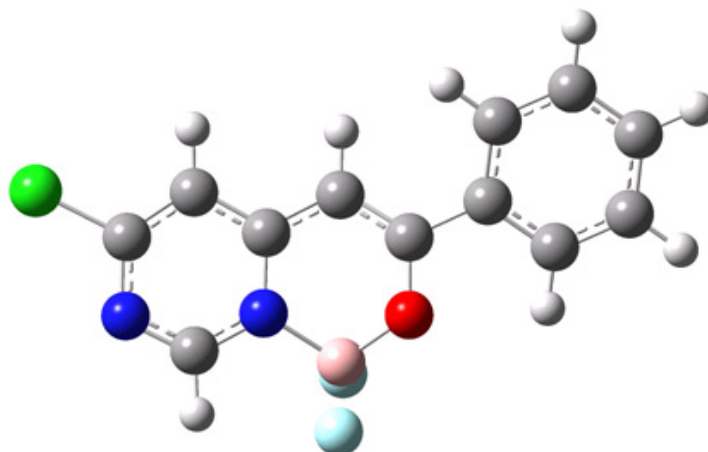

SCF Energy: -1331.77467591

|    |   |         |         |         |
|----|---|---------|---------|---------|
| C  | 0 | -2.2217 | -1.3194 | 0.1829  |
| C  | 0 | -3.4683 | -0.7766 | -0.0333 |
| N  | 0 | -3.7004 | 0.5211  | -0.2938 |
| C  | 0 | -2.6363 | 1.2967  | -0.3051 |
| N  | 0 | -1.3726 | 0.8877  | -0.0798 |
| C  | 0 | -1.1137 | -0.4429 | 0.1407  |
| C  | 0 | 0.2307  | -0.8649 | 0.2710  |
| C  | 0 | 1.2768  | -0.0030 | 0.0052  |
| O  | 0 | 1.0673  | 1.2760  | -0.2605 |
| Cl | 0 | -4.8786 | -1.8076 | 0.0105  |
| C  | 0 | 2.6909  | -0.4207 | -0.0320 |

|   |   |         |         |         |
|---|---|---------|---------|---------|
| C | 0 | 3.0625  | -1.7745 | -0.1241 |
| C | 0 | 4.4064  | -2.1356 | -0.1429 |
| C | 0 | 5.3993  | -1.1541 | -0.0741 |
| C | 0 | 5.0407  | 0.1934  | 0.0079  |
| C | 0 | 3.6975  | 0.5597  | 0.0255  |
| B | 0 | -0.1982 | 1.9586  | 0.0588  |
| F | 0 | -0.4266 | 2.9735  | -0.8439 |
| F | 0 | -0.1870 | 2.4097  | 1.3659  |
| H | 0 | -2.0779 | -2.3763 | 0.3634  |
| H | 0 | -2.7610 | 2.3547  | -0.5070 |
| H | 0 | 0.4166  | -1.9028 | 0.5048  |
| H | 0 | 2.3061  | -2.5472 | -0.2057 |
| H | 0 | 4.6802  | -3.1831 | -0.2198 |
| H | 0 | 6.4468  | -1.4391 | -0.0893 |
| H | 0 | 5.8080  | 0.9594  | 0.0601  |
| H | 0 | 3.4139  | 1.6031  | 0.0935  |

**DFT calculation results of 7.**

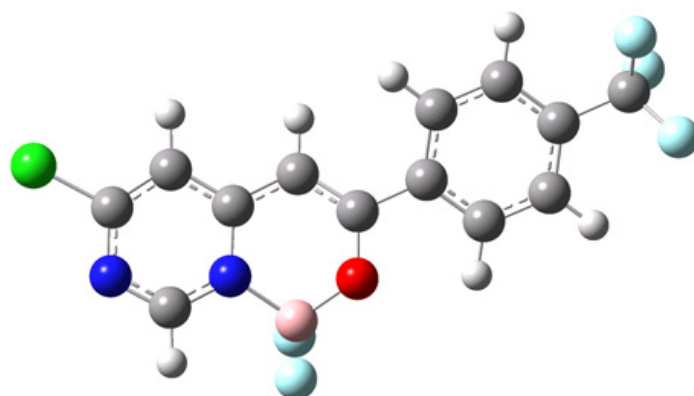

SCF Energy: -1668.80912773

|   |   |         |         |         |
|---|---|---------|---------|---------|
| C | 0 | -3.3962 | -1.4587 | 0.1902  |
| C | 0 | -4.7032 | -1.0829 | -0.0329 |
| N | 0 | -5.0985 | 0.1723  | -0.3001 |
| C | 0 | -4.1438 | 1.0796  | -0.3130 |
| N | 0 | -2.8387 | 0.8380  | -0.0817 |
| C | 0 | -2.4134 | -0.4464 | 0.1469  |
| C | 0 | -1.0232 | -0.6916 | 0.2814  |
| C | 0 | -0.1006 | 0.2966  | 0.0139  |
| O | 0 | -0.4667 | 1.5378  | -0.2573 |

|    |   |         |         |         |
|----|---|---------|---------|---------|
| Cl | 0 | -5.9666 | -2.2874 | 0.0108  |
| C  | 0 | 1.3585  | 0.0623  | -0.0182 |
| C  | 0 | 1.8984  | -1.2305 | -0.1296 |
| C  | 0 | 3.2751  | -1.4206 | -0.1491 |
| C  | 0 | 4.1319  | -0.3191 | -0.0626 |
| C  | 0 | 3.6084  | 0.9724  | 0.0380  |
| C  | 0 | 2.2306  | 1.1613  | 0.0559  |
| B  | 0 | -1.8126 | 2.0550  | 0.0498  |
| F  | 0 | -2.1653 | 3.0203  | -0.8654 |
| F  | 0 | -1.8664 | 2.5152  | 1.3515  |
| C  | 0 | 5.6213  | -0.5321 | -0.0263 |
| F  | 0 | 6.0689  | -0.7012 | 1.2418  |
| F  | 0 | 6.2965  | 0.5186  | -0.5415 |
| F  | 0 | 5.9918  | -1.6315 | -0.7198 |
| H  | 0 | -3.1170 | -2.4872 | 0.3752  |
| H  | 0 | -4.4042 | 2.1113  | -0.5214 |
| H  | 0 | -0.7054 | -1.6953 | 0.5221  |
| H  | 0 | 1.2488  | -2.0924 | -0.2280 |
| H  | 0 | 3.6833  | -2.4199 | -0.2469 |
| H  | 0 | 4.2743  | 1.8259  | 0.0969  |
| H  | 0 | 1.8191  | 2.1601  | 0.1326  |

**DFT calculation results of 8.**

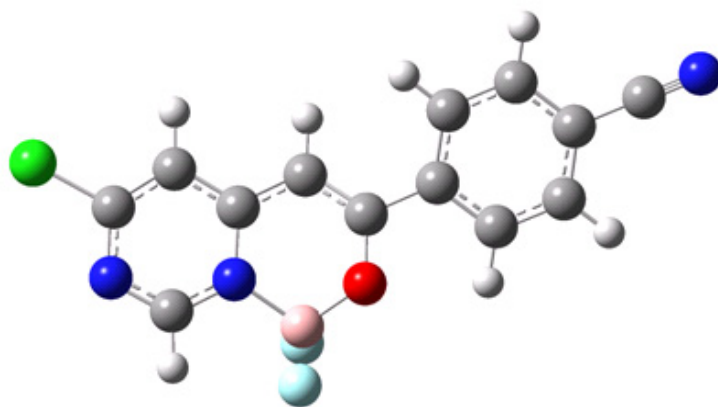

SCF Energy: -1424.01762784

|   |   |         |         |         |
|---|---|---------|---------|---------|
| C | 0 | -2.6934 | -1.4165 | 0.1865  |
| C | 0 | -3.9824 | -0.9808 | -0.0367 |
| N | 0 | -4.3189 | 0.2912  | -0.3021 |
| C | 0 | -3.3237 | 1.1541  | -0.3135 |

|    |   |         |         |         |
|----|---|---------|---------|---------|
| N  | 0 | -2.0312 | 0.8523  | -0.0820 |
| C  | 0 | -1.6663 | -0.4502 | 0.1460  |
| C  | 0 | -0.2876 | -0.7590 | 0.2825  |
| C  | 0 | 0.6780  | 0.1864  | 0.0168  |
| O  | 0 | 0.3702  | 1.4427  | -0.2576 |
| Cl | 0 | -5.2989 | -2.1261 | 0.0054  |
| C  | 0 | 2.1261  | -0.1118 | -0.0100 |
| C  | 0 | 2.6102  | -1.4282 | -0.1085 |
| C  | 0 | 3.9750  | -1.6805 | -0.1223 |
| C  | 0 | 4.8831  | -0.6104 | -0.0422 |
| C  | 0 | 4.4106  | 0.7095  | 0.0464  |
| C  | 0 | 3.0431  | 0.9514  | 0.0585  |
| B  | 0 | -0.9504 | 2.0217  | 0.0505  |
| F  | 0 | -1.2588 | 3.0022  | -0.8639 |
| F  | 0 | -0.9827 | 2.4817  | 1.3525  |
| C  | 0 | 6.2932  | -0.8681 | -0.0571 |
| N  | 0 | 7.4376  | -1.0781 | -0.0686 |
| H  | 0 | -2.4621 | -2.4570 | 0.3702  |
| H  | 0 | -3.5363 | 2.1969  | -0.5207 |
| H  | 0 | -0.0174 | -1.7760 | 0.5257  |
| H  | 0 | 1.9252  | -2.2628 | -0.1987 |
| H  | 0 | 4.3423  | -2.6971 | -0.2033 |
| H  | 0 | 5.1131  | 1.5331  | 0.1065  |
| H  | 0 | 2.6724  | 1.9664  | 0.1285  |

**DFT calculation results of 9.**

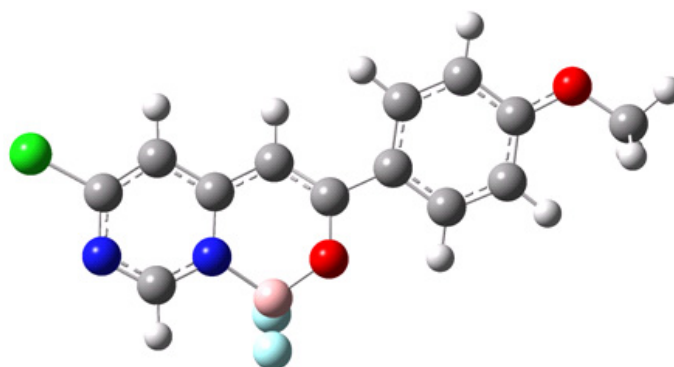

SCF Energy: -1446.30401570

|   |   |         |         |         |
|---|---|---------|---------|---------|
| C | 0 | -2.8972 | -1.3817 | 0.1662  |
| C | 0 | -4.1681 | -0.9084 | -0.0618 |

|    |   |         |         |         |
|----|---|---------|---------|---------|
| N  | 0 | -4.4719 | 0.3769  | -0.3173 |
| C  | 0 | -3.4526 | 1.2102  | -0.3106 |
| N  | 0 | -2.1704 | 0.8722  | -0.0732 |
| C  | 0 | -1.8367 | -0.4442 | 0.1417  |
| C  | 0 | -0.4761 | -0.7915 | 0.2850  |
| C  | 0 | 0.5287  | 0.1293  | 0.0367  |
| O  | 0 | 0.2443  | 1.3963  | -0.2245 |
| Cl | 0 | -5.5197 | -2.0184 | -0.0424 |
| C  | 0 | 1.9560  | -0.2050 | 0.0060  |
| C  | 0 | 2.4193  | -1.5386 | 0.0070  |
| C  | 0 | 3.7724  | -1.8214 | -0.0154 |
| C  | 0 | 4.7157  | -0.7768 | -0.0433 |
| C  | 0 | 4.2742  | 0.5550  | -0.0515 |
| C  | 0 | 2.9103  | 0.8261  | -0.0294 |
| B  | 0 | -1.0600 | 2.0032  | 0.0870  |
| F  | 0 | -1.3339 | 3.0136  | -0.8096 |
| F  | 0 | -1.0877 | 2.4452  | 1.3982  |
| O  | 0 | 6.0142  | -1.1588 | -0.0640 |
| C  | 0 | 7.0261  | -0.1498 | -0.1054 |
| H  | 0 | -2.6968 | -2.4301 | 0.3417  |
| H  | 0 | -3.6343 | 2.2612  | -0.5065 |
| H  | 0 | -0.2387 | -1.8209 | 0.5091  |
| H  | 0 | 1.7186  | -2.3658 | 0.0057  |
| H  | 0 | 4.1304  | -2.8452 | -0.0210 |
| H  | 0 | 4.9791  | 1.3765  | -0.0715 |
| H  | 0 | 2.5718  | 1.8553  | -0.0316 |
| H  | 0 | 7.9759  | -0.6837 | -0.1219 |
| H  | 0 | 6.9837  | 0.4920  | 0.7810  |
| H  | 0 | 6.9369  | 0.4646  | -1.0077 |

**DFT calculation results of 10.**



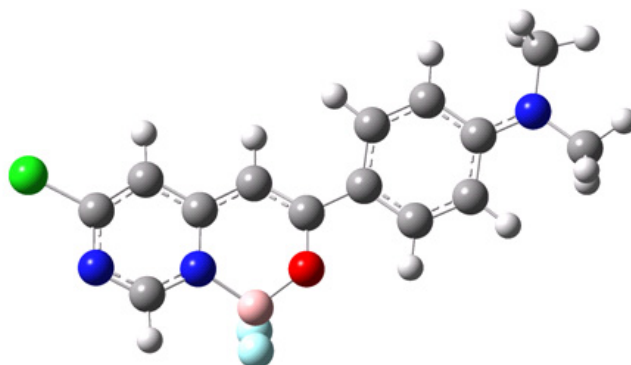

SCF Energy: -1465.75636489

|    |   |         |         |         |
|----|---|---------|---------|---------|
| C  | 0 | -3.1499 | -1.4478 | 0.1449  |
| C  | 0 | -4.4421 | -1.0443 | -0.0828 |
| N  | 0 | -4.8206 | 0.2259  | -0.3248 |
| C  | 0 | -3.8494 | 1.1142  | -0.3024 |
| N  | 0 | -2.5509 | 0.8483  | -0.0642 |
| C  | 0 | -2.1393 | -0.4515 | 0.1350  |
| C  | 0 | -0.7672 | -0.7227 | 0.2786  |
| C  | 0 | 0.1924  | 0.2586  | 0.0497  |
| O  | 0 | -0.1709 | 1.5110  | -0.1967 |
| Cl | 0 | -5.7311 | -2.2305 | -0.0837 |
| C  | 0 | 1.6261  | 0.0094  | 0.0189  |
| C  | 0 | 2.1783  | -1.2879 | 0.0889  |
| C  | 0 | 3.5429  | -1.5000 | 0.0627  |
| C  | 0 | 4.4535  | -0.4115 | -0.0393 |
| C  | 0 | 3.8970  | 0.8947  | -0.1169 |
| C  | 0 | 2.5294  | 1.0886  | -0.0893 |
| B  | 0 | -1.5080 | 2.0349  | 0.1176  |
| F  | 0 | -1.8351 | 3.0445  | -0.7646 |
| F  | 0 | -1.5666 | 2.4582  | 1.4358  |
| N  | 0 | 5.8054  | -0.6140 | -0.0636 |
| C  | 0 | 6.3507  | -1.9636 | 0.0266  |
| C  | 0 | 6.7164  | 0.5170  | -0.1985 |
| H  | 0 | -2.8917 | -2.4854 | 0.3091  |
| H  | 0 | -4.0896 | 2.1558  | -0.4855 |
| H  | 0 | -0.4740 | -1.7420 | 0.4817  |
| H  | 0 | 1.5318  | -2.1566 | 0.1513  |
| H  | 0 | 3.9115  | -2.5162 | 0.1125  |
| H  | 0 | 4.5437  | 1.7591  | -0.1942 |
| H  | 0 | 2.1357  | 2.0967  | -0.1450 |

|   |   |        |         |         |
|---|---|--------|---------|---------|
| H | 0 | 6.0352 | -2.5871 | -0.8192 |
| H | 0 | 6.0418 | -2.4609 | 0.9537  |
| H | 0 | 7.4383 | -1.9092 | 0.0196  |
| H | 0 | 6.6197 | 1.2168  | 0.6405  |
| H | 0 | 6.5378 | 1.0701  | -1.1286 |
| H | 0 | 7.7412 | 0.1489  | -0.2153 |

**DFT calculation results of 11.**

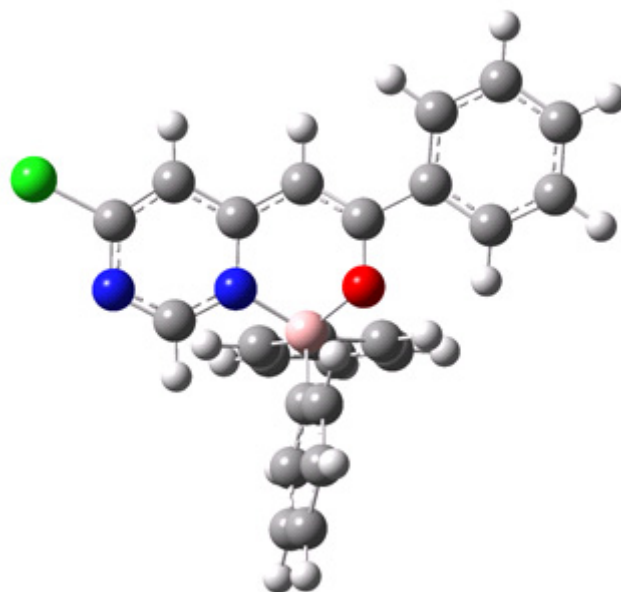

SCF Energy: -1595.29055595

|    |   |         |         |         |
|----|---|---------|---------|---------|
| C  | 0 | -1.6149 | -2.8355 | -0.0647 |
| C  | 0 | -2.9411 | -2.5588 | -0.3109 |
| N  | 0 | -3.4251 | -1.3365 | -0.5708 |
| C  | 0 | -2.5376 | -0.3576 | -0.5456 |
| N  | 0 | -1.2257 | -0.4918 | -0.2821 |
| C  | 0 | -0.7103 | -1.7500 | -0.0683 |
| C  | 0 | 0.6892  | -1.9116 | 0.0756  |
| C  | 0 | 1.5545  | -0.8857 | -0.2560 |
| O  | 0 | 1.1076  | 0.3255  | -0.5186 |
| Cl | 0 | -4.1106 | -3.8614 | -0.3103 |
| C  | 0 | 3.0154  | -1.0586 | -0.3982 |
| C  | 0 | 3.6208  | -2.3287 | -0.3968 |
| C  | 0 | 5.0012  | -2.4528 | -0.5250 |
| C  | 0 | 5.8003  | -1.3145 | -0.6644 |
| C  | 0 | 5.2091  | -0.0492 | -0.6781 |

|   |   |         |         |         |
|---|---|---------|---------|---------|
| C | 0 | 3.8286  | 0.0793  | -0.5477 |
| B | 0 | -0.2511 | 0.7885  | -0.0454 |
| C | 0 | -0.7083 | 2.0172  | -0.9913 |
| C | 0 | -0.2082 | 1.1070  | 1.5467  |
| C | 0 | -1.2558 | 1.2706  | 3.7580  |
| C | 0 | -0.7697 | 3.0596  | -3.2082 |
| C | 0 | -1.3084 | 0.9284  | 2.4035  |
| C | 0 | -0.3807 | 2.0208  | -2.3611 |
| C | 0 | -0.0851 | 1.8037  | 4.2990  |
| C | 0 | 1.0249  | 1.9926  | 3.4720  |
| C | 0 | 0.9570  | 1.6503  | 2.1203  |
| C | 0 | -1.5101 | 4.1324  | -2.7040 |
| C | 0 | -1.4482 | 3.1118  | -0.5105 |
| C | 0 | -1.8496 | 4.1552  | -1.3505 |
| H | 0 | -1.2596 | -3.8426 | 0.1081  |
| H | 0 | -2.8803 | 0.6521  | -0.7421 |
| H | 0 | 1.0592  | -2.9011 | 0.3004  |
| H | 0 | 3.0180  | -3.2259 | -0.3134 |
| H | 0 | 5.4538  | -3.4395 | -0.5240 |
| H | 0 | 6.8766  | -1.4147 | -0.7658 |
| H | 0 | 5.8239  | 0.8385  | -0.7891 |
| H | 0 | 3.3658  | 1.0587  | -0.5603 |
| H | 0 | -2.1267 | 1.1156  | 4.3896  |
| H | 0 | -0.4960 | 3.0347  | -4.2599 |
| H | 0 | -2.2344 | 0.5074  | 2.0176  |
| H | 0 | 0.2002  | 1.1968  | -2.7682 |
| H | 0 | -0.0372 | 2.0678  | 5.3518  |
| H | 0 | 1.9435  | 2.4058  | 3.8809  |
| H | 0 | 1.8329  | 1.8038  | 1.4952  |
| H | 0 | -1.8156 | 4.9432  | -3.3597 |
| H | 0 | -1.7108 | 3.1537  | 0.5434  |
| H | 0 | -2.4208 | 4.9870  | -0.9466 |

**DFT calculation results of 12.**

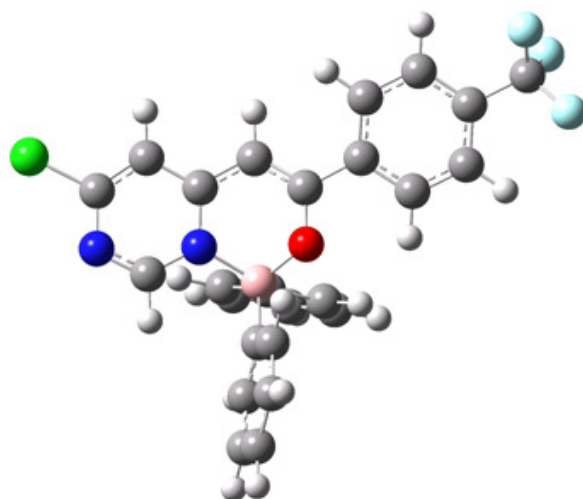

SCF Energy: -1932.32508795

|    |   |         |         |         |
|----|---|---------|---------|---------|
| C  | 0 | 2.2201  | 3.0148  | -0.0396 |
| C  | 0 | 3.5625  | 2.9499  | -0.3446 |
| N  | 0 | 4.2160  | 1.8199  | -0.6446 |
| C  | 0 | 3.4916  | 0.7153  | -0.6052 |
| N  | 0 | 2.1855  | 0.6430  | -0.2914 |
| C  | 0 | 1.4961  | 1.8033  | -0.0279 |
| C  | 0 | 0.0941  | 1.7449  | 0.1820  |
| C  | 0 | -0.6145 | 0.6036  | -0.1314 |
| O  | 0 | -0.0073 | -0.5198 | -0.4500 |
| Cl | 0 | 4.5151  | 4.4165  | -0.3677 |
| C  | 0 | -2.0934 | 0.5515  | -0.1806 |
| C  | 0 | -2.8797 | 1.7169  | -0.1919 |
| C  | 0 | -4.2664 | 1.6336  | -0.2245 |
| C  | 0 | -4.8893 | 0.3814  | -0.2537 |
| C  | 0 | -4.1206 | -0.7845 | -0.2576 |
| C  | 0 | -2.7323 | -0.6986 | -0.2251 |
| B  | 0 | 1.4329  | -0.7789 | -0.0546 |
| C  | 0 | 2.0248  | -1.8958 | -1.0601 |
| C  | 0 | 1.5085  | -1.1495 | 1.5238  |
| C  | 0 | 2.5205  | -1.0411 | 3.7545  |
| C  | 0 | 2.1229  | -2.8816 | -3.3008 |
| C  | 0 | 2.4758  | -0.6501 | 2.4123  |
| C  | 0 | 1.6159  | -1.9371 | -2.4069 |
| C  | 0 | 1.5853  | -1.9498 | 4.2496  |
| C  | 0 | 0.6115  | -2.4648 | 3.3895  |
| C  | 0 | 0.5815  | -2.0698 | 2.0517  |

|   |   |         |         |         |
|---|---|---------|---------|---------|
| C | 0 | 3.0681  | -3.8158 | -2.8686 |
| C | 0 | 2.9725  | -2.8511 | -0.6516 |
| C | 0 | 3.4934  | -3.7972 | -1.5394 |
| C | 0 | -6.3914 | 0.2989  | -0.2294 |
| F | 0 | -6.8750 | 0.4001  | 1.0328  |
| F | 0 | -6.8463 | -0.8701 | -0.7307 |
| F | 0 | -6.9627 | 1.2954  | -0.9434 |
| H | 0 | 1.7215  | 3.9522  | 0.1678  |
| H | 0 | 3.9772  | -0.2270 | -0.8325 |
| H | 0 | -0.4128 | 2.6585  | 0.4564  |
| H | 0 | -2.4144 | 2.6956  | -0.1981 |
| H | 0 | -4.8630 | 2.5388  | -0.2418 |
| H | 0 | -4.6048 | -1.7536 | -0.2897 |
| H | 0 | -2.1313 | -1.5993 | -0.2313 |
| H | 0 | 3.2831  | -0.6313 | 4.4117  |
| H | 0 | 1.7822  | -2.8907 | -4.3329 |
| H | 0 | 3.2168  | 0.0662  | 2.0646  |
| H | 0 | 0.8776  | -1.2205 | -2.7582 |
| H | 0 | 1.6136  | -2.2543 | 5.2922  |
| H | 0 | -0.1225 | -3.1748 | 3.7619  |
| H | 0 | -0.1821 | -2.4865 | 1.3992  |
| H | 0 | 3.4661  | -4.5525 | -3.5611 |
| H | 0 | 3.3046  | -2.8606 | 0.3835  |
| H | 0 | 4.2247  | -4.5222 | -1.1919 |

**DFT calculation results of 13.**

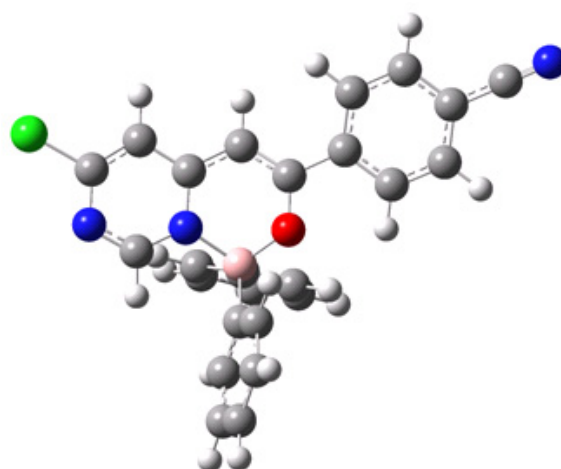

SCF Energy: -1687.53379317

|    |   |         |         |         |
|----|---|---------|---------|---------|
| C  | 0 | 1.7313  | 2.9728  | -0.0508 |
| C  | 0 | 3.0750  | 2.8499  | -0.3344 |
| N  | 0 | 3.6846  | 1.6912  | -0.6147 |
| C  | 0 | 2.9146  | 0.6177  | -0.5780 |
| N  | 0 | 1.6020  | 0.6027  | -0.2838 |
| C  | 0 | 0.9586  | 1.7927  | -0.0399 |
| C  | 0 | -0.4489 | 1.7946  | 0.1492  |
| C  | 0 | -1.1986 | 0.6819  | -0.1681 |
| O  | 0 | -0.6342 | -0.4672 | -0.4740 |
| Cl | 0 | 4.0877  | 4.2749  | -0.3545 |
| C  | 0 | -2.6781 | 0.6888  | -0.2395 |
| C  | 0 | -3.4201 | 1.8833  | -0.2278 |
| C  | 0 | -4.8067 | 1.8568  | -0.2848 |
| C  | 0 | -5.4788 | 0.6245  | -0.3627 |
| C  | 0 | -4.7480 | -0.5749 | -0.3873 |
| C  | 0 | -3.3610 | -0.5367 | -0.3279 |
| B  | 0 | 0.7867  | -0.7852 | -0.0503 |
| C  | 0 | 1.3485  | -1.9323 | -1.0382 |
| C  | 0 | 0.8172  | -1.1450 | 1.5318  |
| C  | 0 | 1.7853  | -1.0511 | 3.7824  |
| C  | 0 | 1.4633  | -2.9213 | -3.2767 |
| C  | 0 | 1.7823  | -0.6710 | 2.4364  |
| C  | 0 | 0.9791  | -1.9519 | -2.3969 |
| C  | 0 | 0.8094  | -1.9230 | 4.2649  |
| C  | 0 | -0.1635 | -2.4120 | 3.3886  |
| C  | 0 | -0.1520 | -2.0280 | 2.0473  |
| C  | 0 | 2.3446  | -3.9039 | -2.8173 |
| C  | 0 | 2.2318  | -2.9360 | -0.6025 |
| C  | 0 | 2.7290  | -3.9081 | -1.4757 |
| C  | 0 | -6.9106 | 0.5939  | -0.4226 |
| N  | 0 | -8.0731 | 0.5696  | -0.4706 |
| H  | 0 | 1.2690  | 3.9319  | 0.1410  |
| H  | 0 | 3.3638  | -0.3457 | -0.7902 |
| H  | 0 | -0.9201 | 2.7310  | 0.4098  |
| H  | 0 | -2.9201 | 2.8438  | -0.1917 |
| H  | 0 | -5.3719 | 2.7818  | -0.2771 |
| H  | 0 | -5.2678 | -1.5243 | -0.4502 |
| H  | 0 | -2.7919 | -1.4575 | -0.3466 |
| H  | 0 | 2.5476  | -0.6619 | 4.4523  |

|   |   |         |         |         |
|---|---|---------|---------|---------|
| H | 0 | 1.1545  | -2.9123 | -4.3188 |
| H | 0 | 2.5547  | 0.0161  | 2.0986  |
| H | 0 | 0.2905  | -1.1975 | -2.7696 |
| H | 0 | 0.8055  | -2.2193 | 5.3102  |
| H | 0 | -0.9291 | -3.0931 | 3.7512  |
| H | 0 | -0.9162 | -2.4235 | 1.3824  |
| H | 0 | 2.7246  | -4.6601 | -3.4988 |
| H | 0 | 2.5312  | -2.9628 | 0.4421  |
| H | 0 | 3.4103  | -4.6705 | -1.1073 |

**DFT calculation results of 14.**

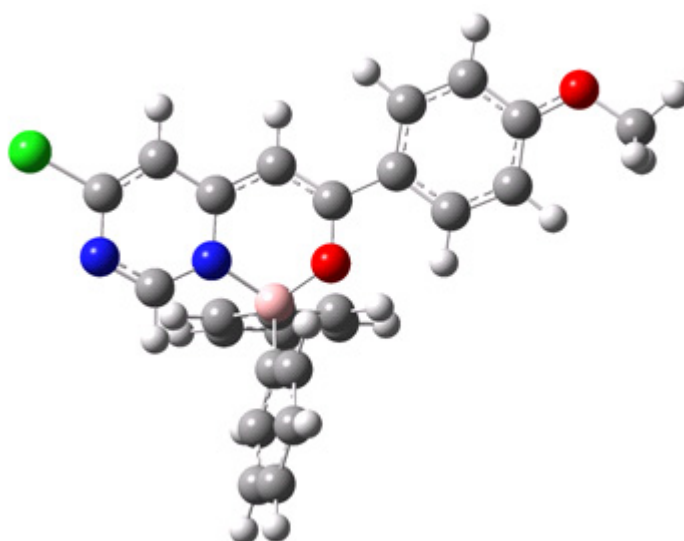

SCF Energy: -1709.81971712

|    |   |         |         |         |
|----|---|---------|---------|---------|
| C  | 0 | 1.9750  | 2.9200  | -0.1413 |
| C  | 0 | 3.3019  | 2.7297  | -0.4501 |
| N  | 0 | 3.8567  | 1.5391  | -0.7215 |
| C  | 0 | 3.0394  | 0.5040  | -0.6434 |
| N  | 0 | 1.7355  | 0.5521  | -0.3183 |
| C  | 0 | 1.1445  | 1.7754  | -0.0891 |
| C  | 0 | -0.2498 | 1.8442  | 0.1299  |
| C  | 0 | -1.0646 | 0.7563  | -0.1413 |
| O  | 0 | -0.5446 | -0.4207 | -0.4331 |
| Cl | 0 | 4.3799  | 4.1090  | -0.5217 |
| C  | 0 | -2.5319 | 0.8207  | -0.1892 |
| C  | 0 | -3.2465 | 2.0259  | -0.0176 |
| C  | 0 | -4.6286 | 2.0469  | -0.0614 |

|   |   |         |         |         |
|---|---|---------|---------|---------|
| C | 0 | -5.3506 | 0.8600  | -0.2870 |
| C | 0 | -4.6585 | -0.3466 | -0.4679 |
| C | 0 | -3.2683 | -0.3544 | -0.4170 |
| B | 0 | 0.8630  | -0.7865 | -0.0277 |
| C | 0 | 1.3544  | -1.9889 | -0.9916 |
| C | 0 | 0.9206  | -1.0963 | 1.5662  |
| C | 0 | 2.0988  | -1.2125 | 3.7143  |
| C | 0 | 1.3992  | -3.0202 | -3.2144 |
| C | 0 | 2.0623  | -0.8777 | 2.3575  |
| C | 0 | 0.9842  | -2.0056 | -2.3506 |
| C | 0 | 0.9788  | -1.7790 | 4.3247  |
| C | 0 | -0.1704 | -2.0075 | 3.5643  |
| C | 0 | -0.1915 | -1.6718 | 2.2092  |
| C | 0 | 2.2090  | -4.0552 | -2.7386 |
| C | 0 | 2.1640  | -3.0455 | -0.5396 |
| C | 0 | 2.5913  | -4.0646 | -1.3966 |
| O | 0 | -6.6988 | 0.9884  | -0.3132 |
| C | 0 | -7.4942 | -0.1770 | -0.5405 |
| H | 0 | 1.5614  | 3.9031  | 0.0395  |
| H | 0 | 3.4391  | -0.4831 | -0.8472 |
| H | 0 | -0.6716 | 2.8116  | 0.3599  |
| H | 0 | -2.7226 | 2.9606  | 0.1466  |
| H | 0 | -5.1787 | 2.9723  | 0.0710  |
| H | 0 | -5.1890 | -1.2738 | -0.6448 |
| H | 0 | -2.7352 | -1.2871 | -0.5570 |
| H | 0 | 2.9993  | -1.0260 | 4.2937  |
| H | 0 | 1.0921  | -3.0058 | -4.2571 |
| H | 0 | 2.9508  | -0.4297 | 1.9173  |
| H | 0 | 0.3501  | -1.2108 | -2.7358 |
| H | 0 | 1.0002  | -2.0376 | 5.3798  |
| H | 0 | -1.0504 | -2.4464 | 4.0277  |
| H | 0 | -1.0970 | -1.8553 | 1.6366  |
| H | 0 | 2.5351  | -4.8470 | -3.4074 |
| H | 0 | 2.4621  | -3.0770 | 0.5052  |
| H | 0 | 3.2169  | -4.8672 | -1.0146 |
| H | 0 | -8.5296 | 0.1626  | -0.5220 |
| H | 0 | -7.3409 | -0.9226 | 0.2471  |
| H | 0 | -7.2744 | -0.6243 | -1.5159 |



DFT calculation results of 15.

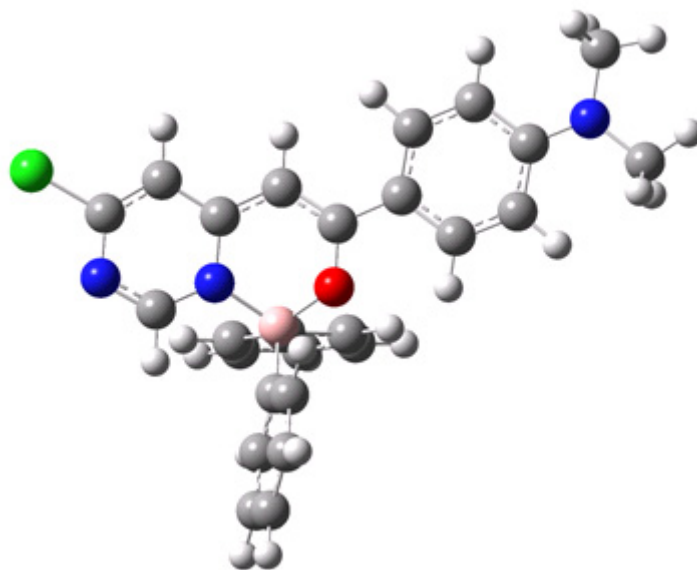

SCF Energy: -1729.27164887

|    |   |         |         |         |
|----|---|---------|---------|---------|
| C  | 0 | 2.0357  | 2.9996  | -0.1474 |
| C  | 0 | 3.3696  | 2.9031  | -0.4592 |
| N  | 0 | 4.0090  | 1.7548  | -0.7361 |
| C  | 0 | 3.2661  | 0.6654  | -0.6567 |
| N  | 0 | 1.9630  | 0.6192  | -0.3288 |
| C  | 0 | 1.2832  | 1.7985  | -0.0983 |
| C  | 0 | -0.1071 | 1.7689  | 0.1222  |
| C  | 0 | -0.8494 | 0.6217  | -0.1411 |
| O  | 0 | -0.2414 | -0.5157 | -0.4300 |
| Cl | 0 | 4.3497  | 4.3564  | -0.5306 |
| C  | 0 | -2.3074 | 0.5814  | -0.1819 |
| C  | 0 | -3.1126 | 1.7280  | -0.0149 |
| C  | 0 | -4.4925 | 1.6597  | -0.0480 |
| C  | 0 | -5.1619 | 0.4227  | -0.2597 |
| C  | 0 | -4.3509 | -0.7309 | -0.4374 |
| C  | 0 | -2.9719 | -0.6443 | -0.3982 |
| B  | 0 | 1.1892  | -0.7744 | -0.0301 |
| C  | 0 | 1.7615  | -1.9446 | -0.9916 |
| C  | 0 | 1.2777  | -1.0755 | 1.5651  |
| C  | 0 | 2.4863  | -1.1299 | 3.6992  |
| C  | 0 | 1.8658  | -2.9808 | -3.2107 |
| C  | 0 | 2.4176  | -0.8015 | 2.3422  |
| C  | 0 | 1.3856  | -1.9940 | -2.3483 |

|     |         |         |         |
|-----|---------|---------|---------|
| C 0 | 1.4017  | -1.7463 | 4.3251  |
| C 0 | 0.2551  | -2.0299 | 3.5796  |
| C 0 | 0.2018  | -1.6997 | 2.2238  |
| C 0 | 2.7492  | -3.9541 | -2.7356 |
| C 0 | 2.6461  | -2.9397 | -0.5406 |
| C 0 | 3.1391  | -3.9302 | -1.3959 |
| N 0 | -6.5278 | 0.3476  | -0.2925 |
| C 0 | -7.3365 | 1.5455  | -0.1012 |
| C 0 | -7.1881 | -0.9327 | -0.5182 |
| H 0 | 1.5551  | 3.9511  | 0.0377  |
| H 0 | 3.7343  | -0.2909 | -0.8626 |
| H 0 | -0.5968 | 2.7048  | 0.3489  |
| H 0 | -2.6576 | 2.7005  | 0.1389  |
| H 0 | -5.0608 | 2.5710  | 0.0855  |
| H 0 | -4.8074 | -1.6981 | -0.6036 |
| H 0 | -2.3794 | -1.5412 | -0.5365 |
| H 0 | 3.3843  | -0.8999 | 4.2670  |
| H 0 | 1.5523  | -2.9928 | -4.2515 |
| H 0 | 3.2789  | -0.3137 | 1.8900  |
| H 0 | 0.6947  | -1.2477 | -2.7327 |
| H 0 | 1.4482  | -2.0006 | 5.3805  |
| H 0 | -0.5981 | -2.5075 | 4.0549  |
| H 0 | -0.7013 | -1.9262 | 1.6629  |
| H 0 | 3.1263  | -4.7243 | -3.4030 |
| H 0 | 2.9515  | -2.9452 | 0.5025  |
| H 0 | 3.8217  | -4.6852 | -1.0144 |
| H 0 | -7.1377 | 2.2967  | -0.8755 |
| H 0 | -7.1528 | 2.0056  | 0.8774  |
| H 0 | -8.3904 | 1.2761  | -0.1548 |
| H 0 | -6.9442 | -1.6581 | 0.2677  |
| H 0 | -6.9067 | -1.3677 | -1.4849 |
| H 0 | -8.2668 | -0.7824 | -0.5164 |

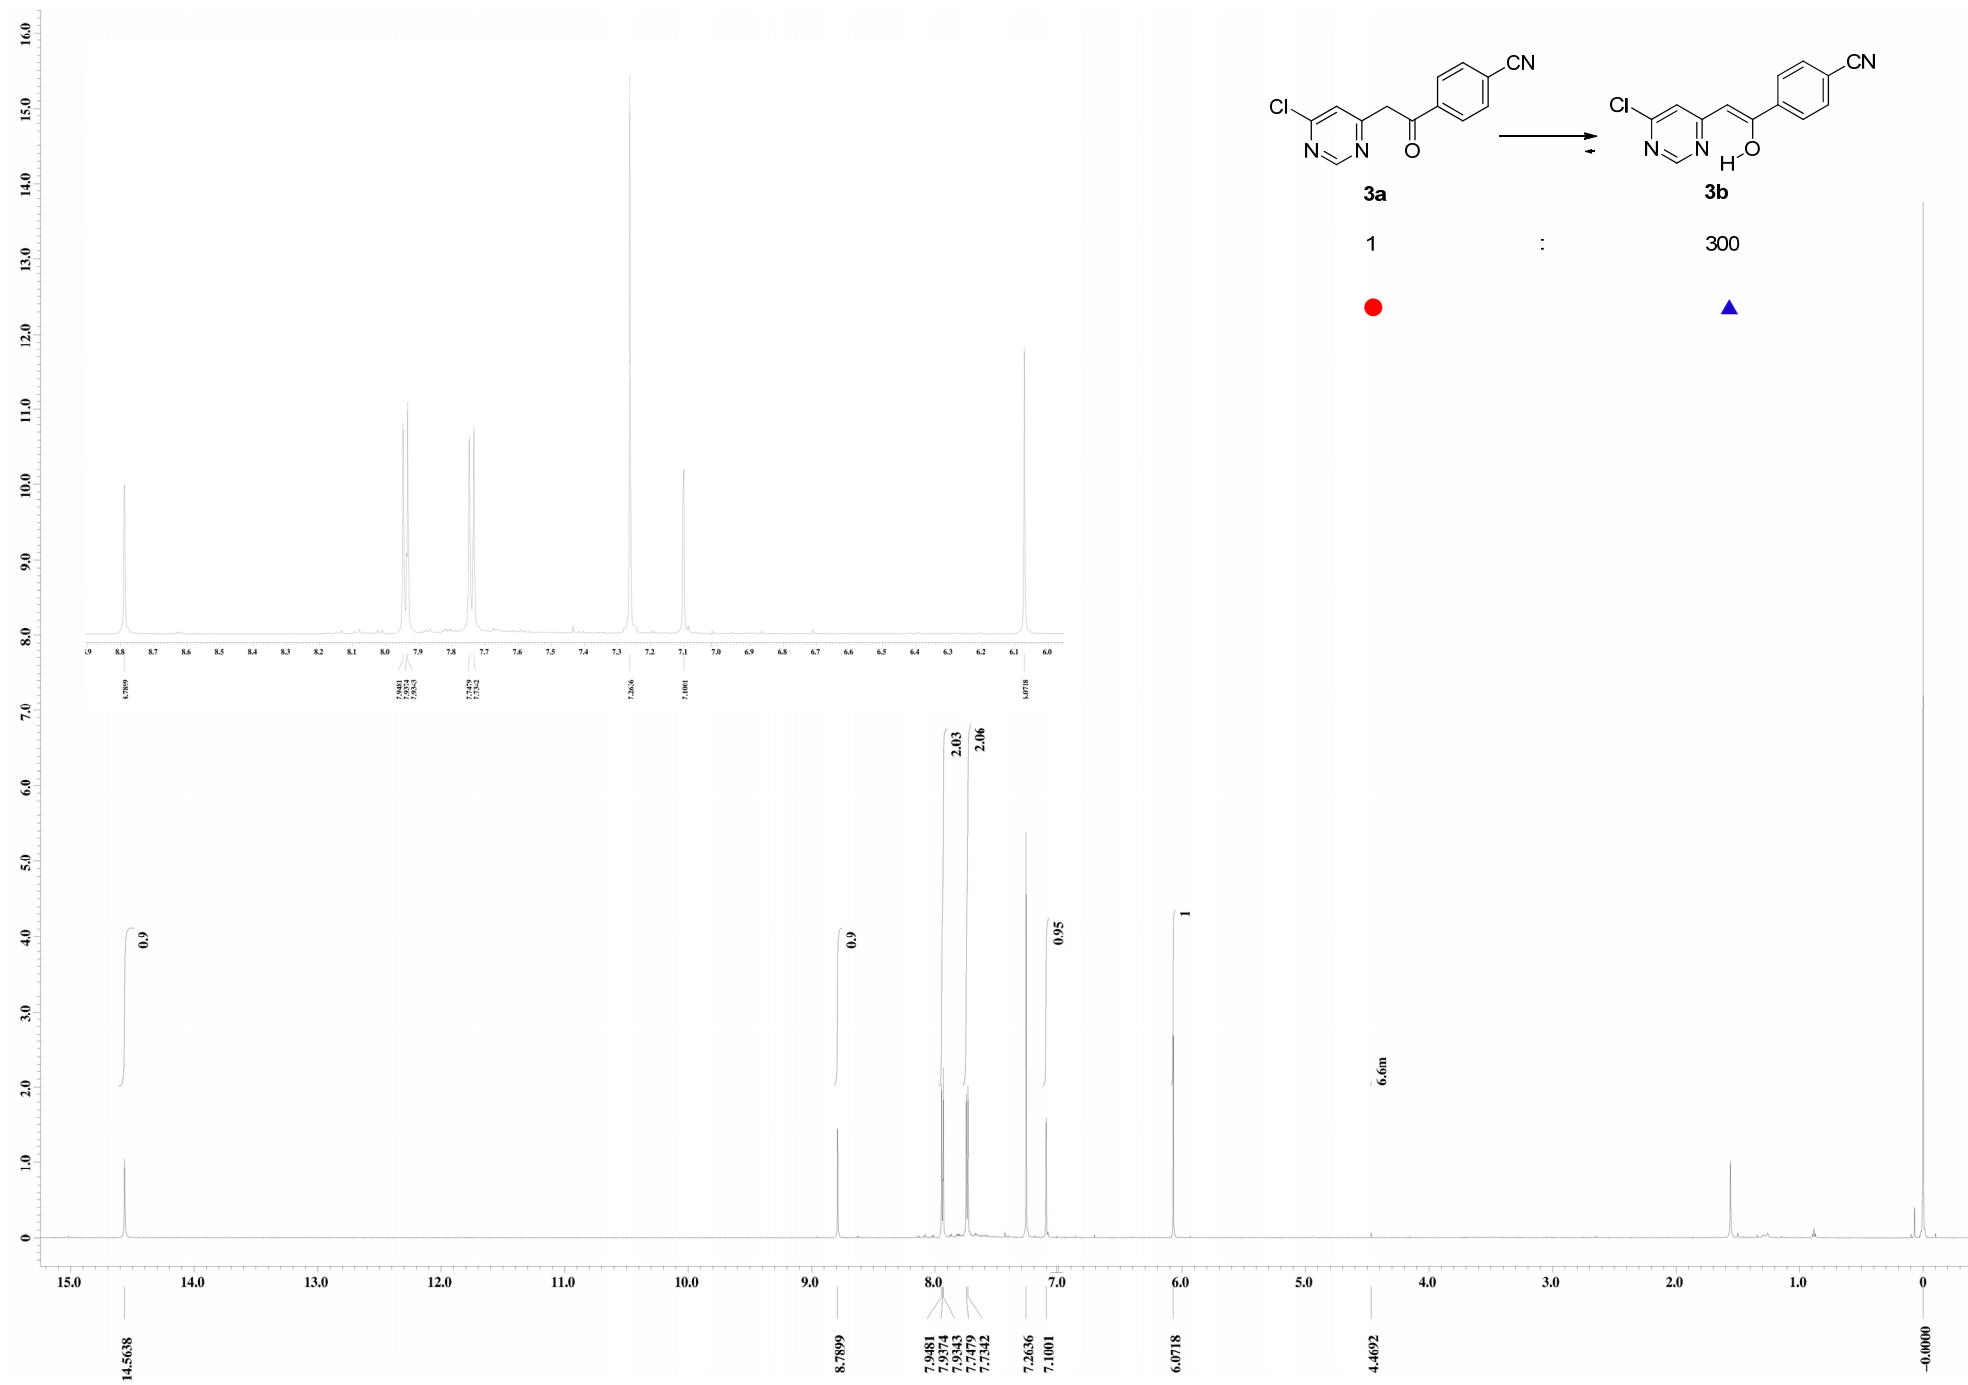

Figure S13. <sup>1</sup>H NMR spectra of **3**.

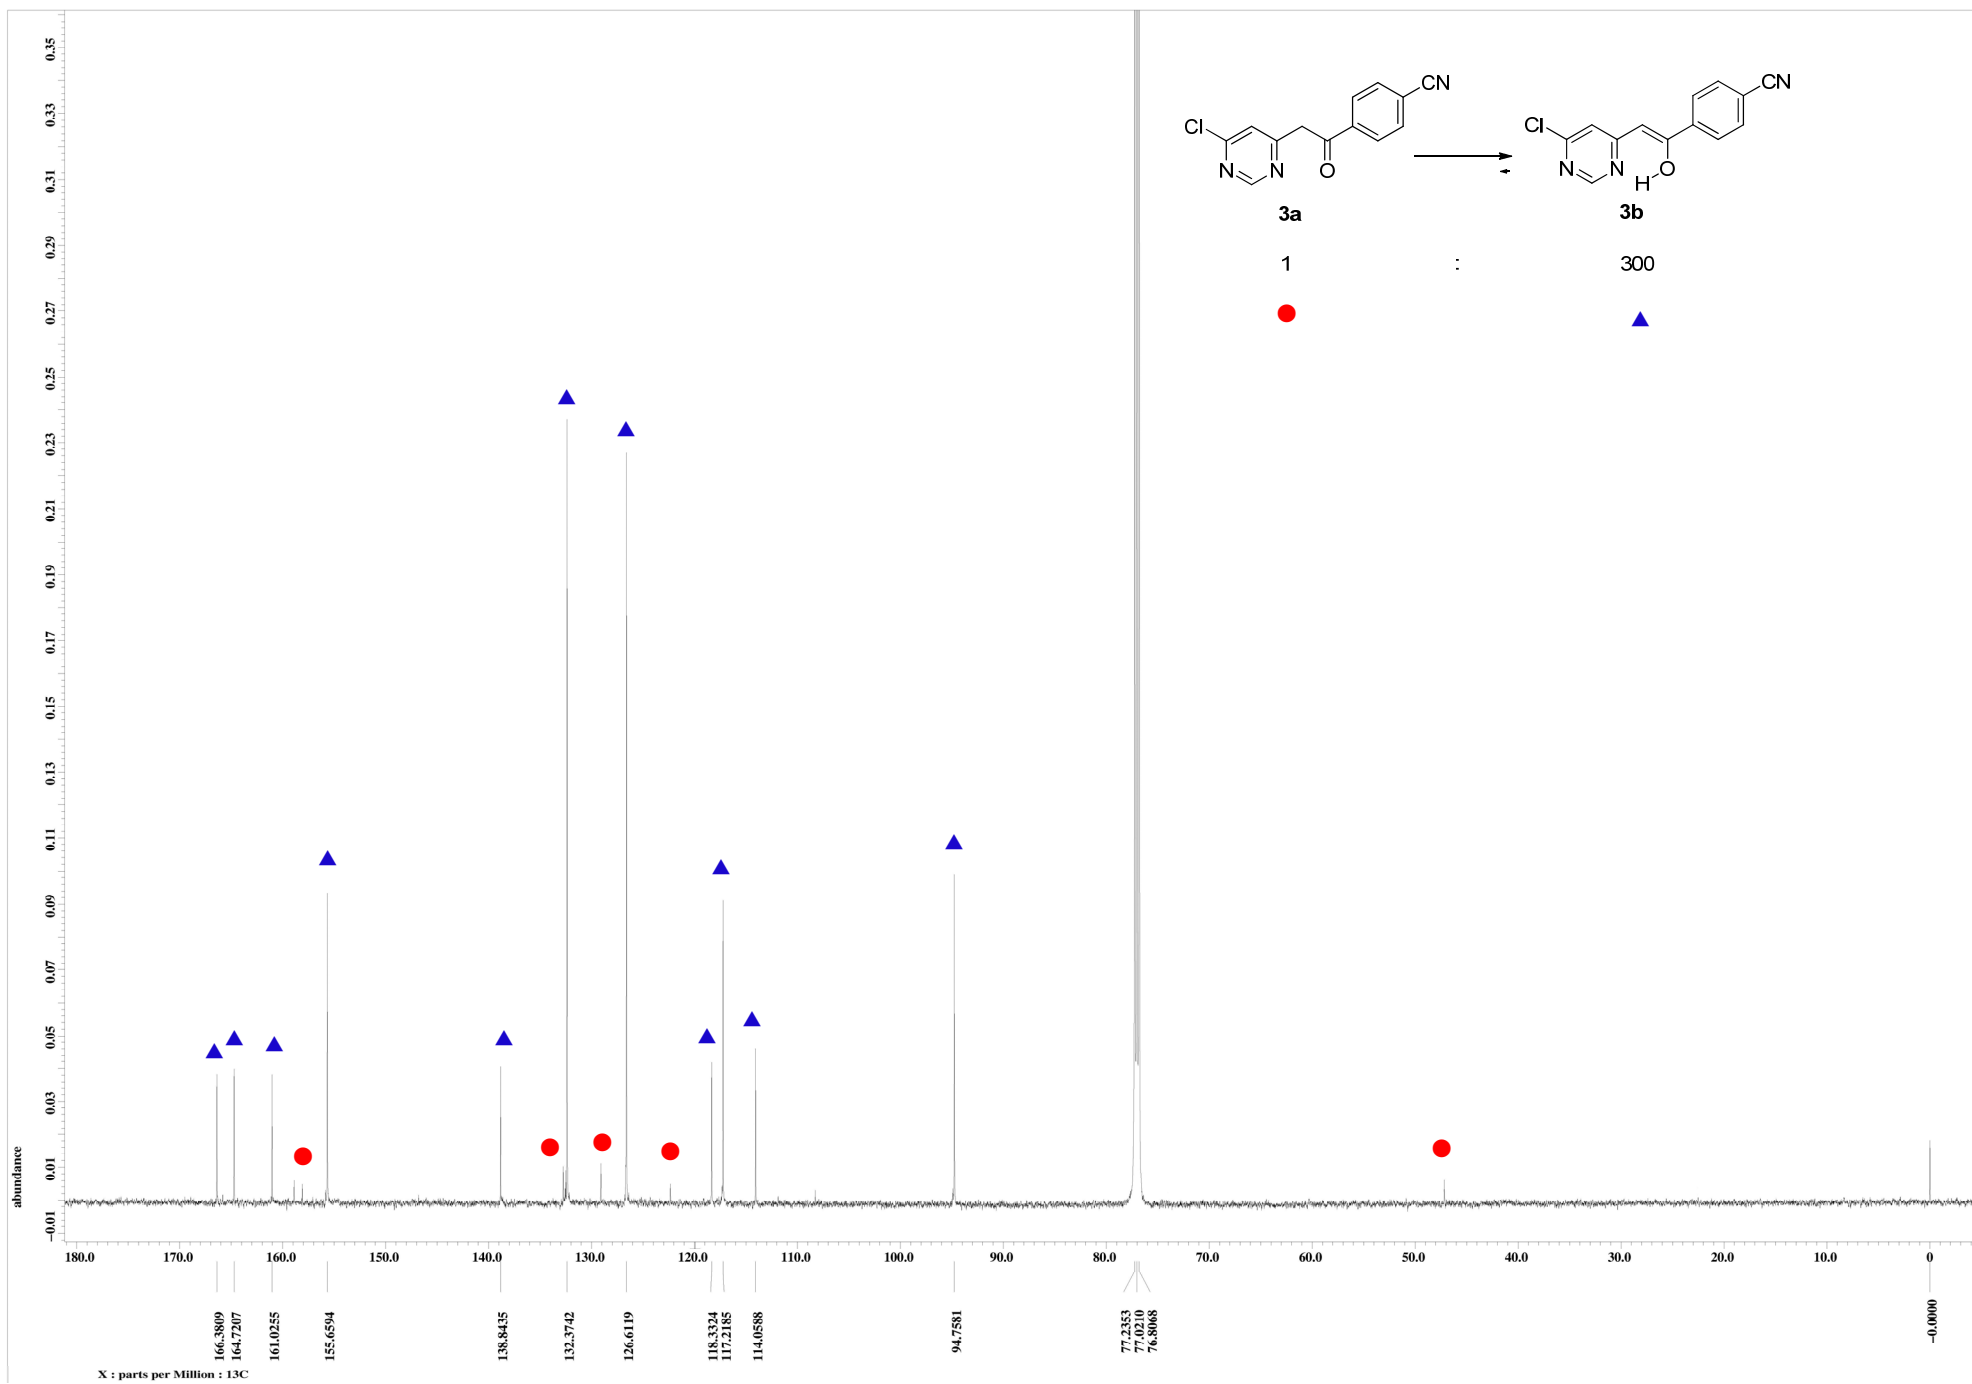

Figure S14. <sup>13</sup>C NMR spectra of **3**.



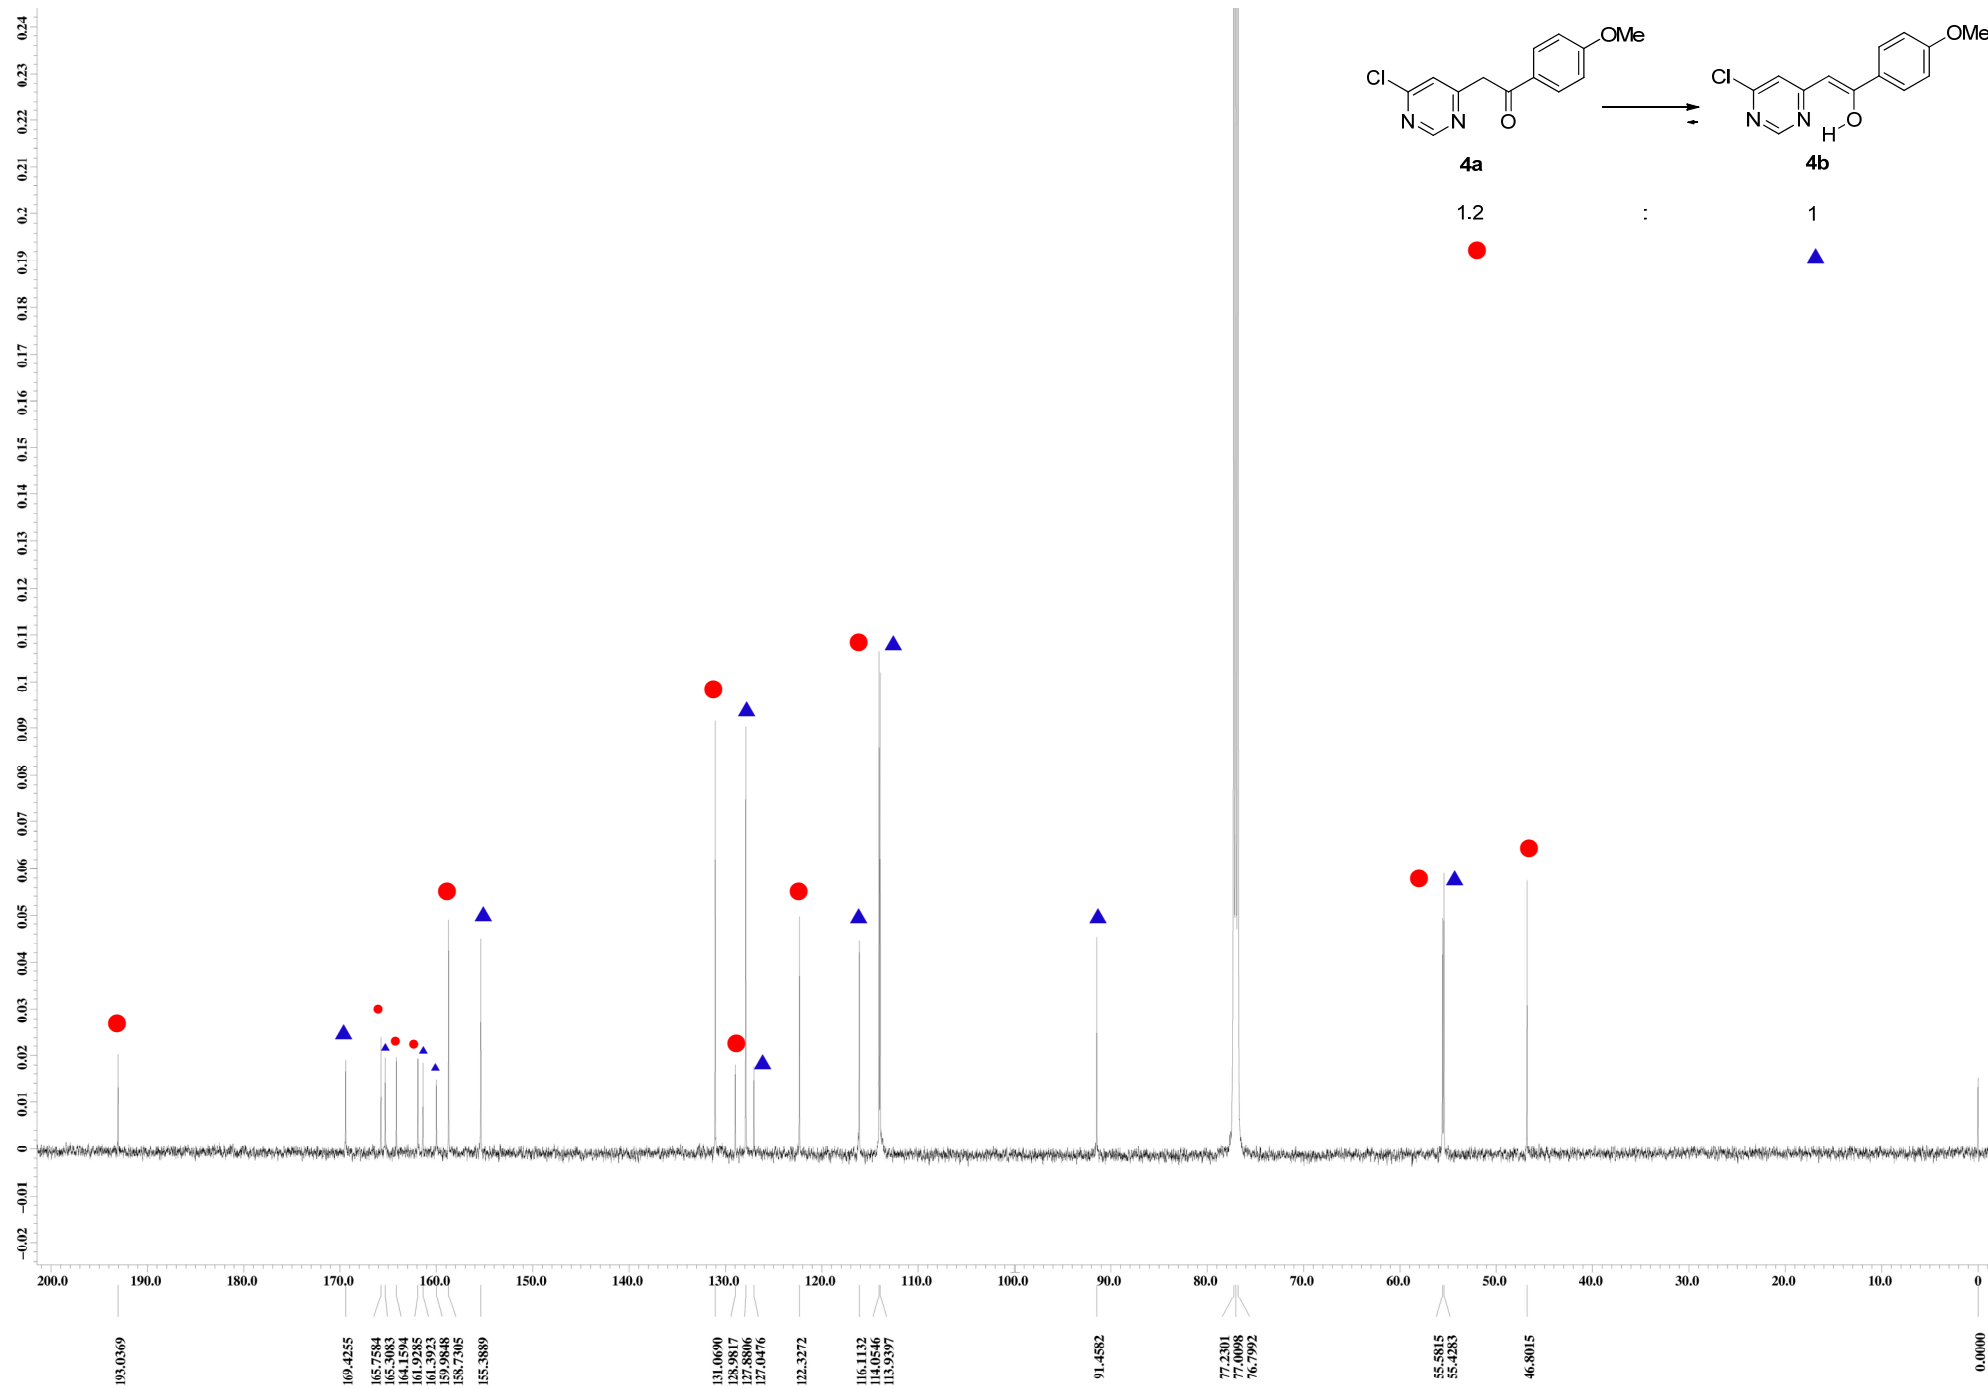

Figure S16.  $^{13}\text{C}$  NMR spectra of 4.

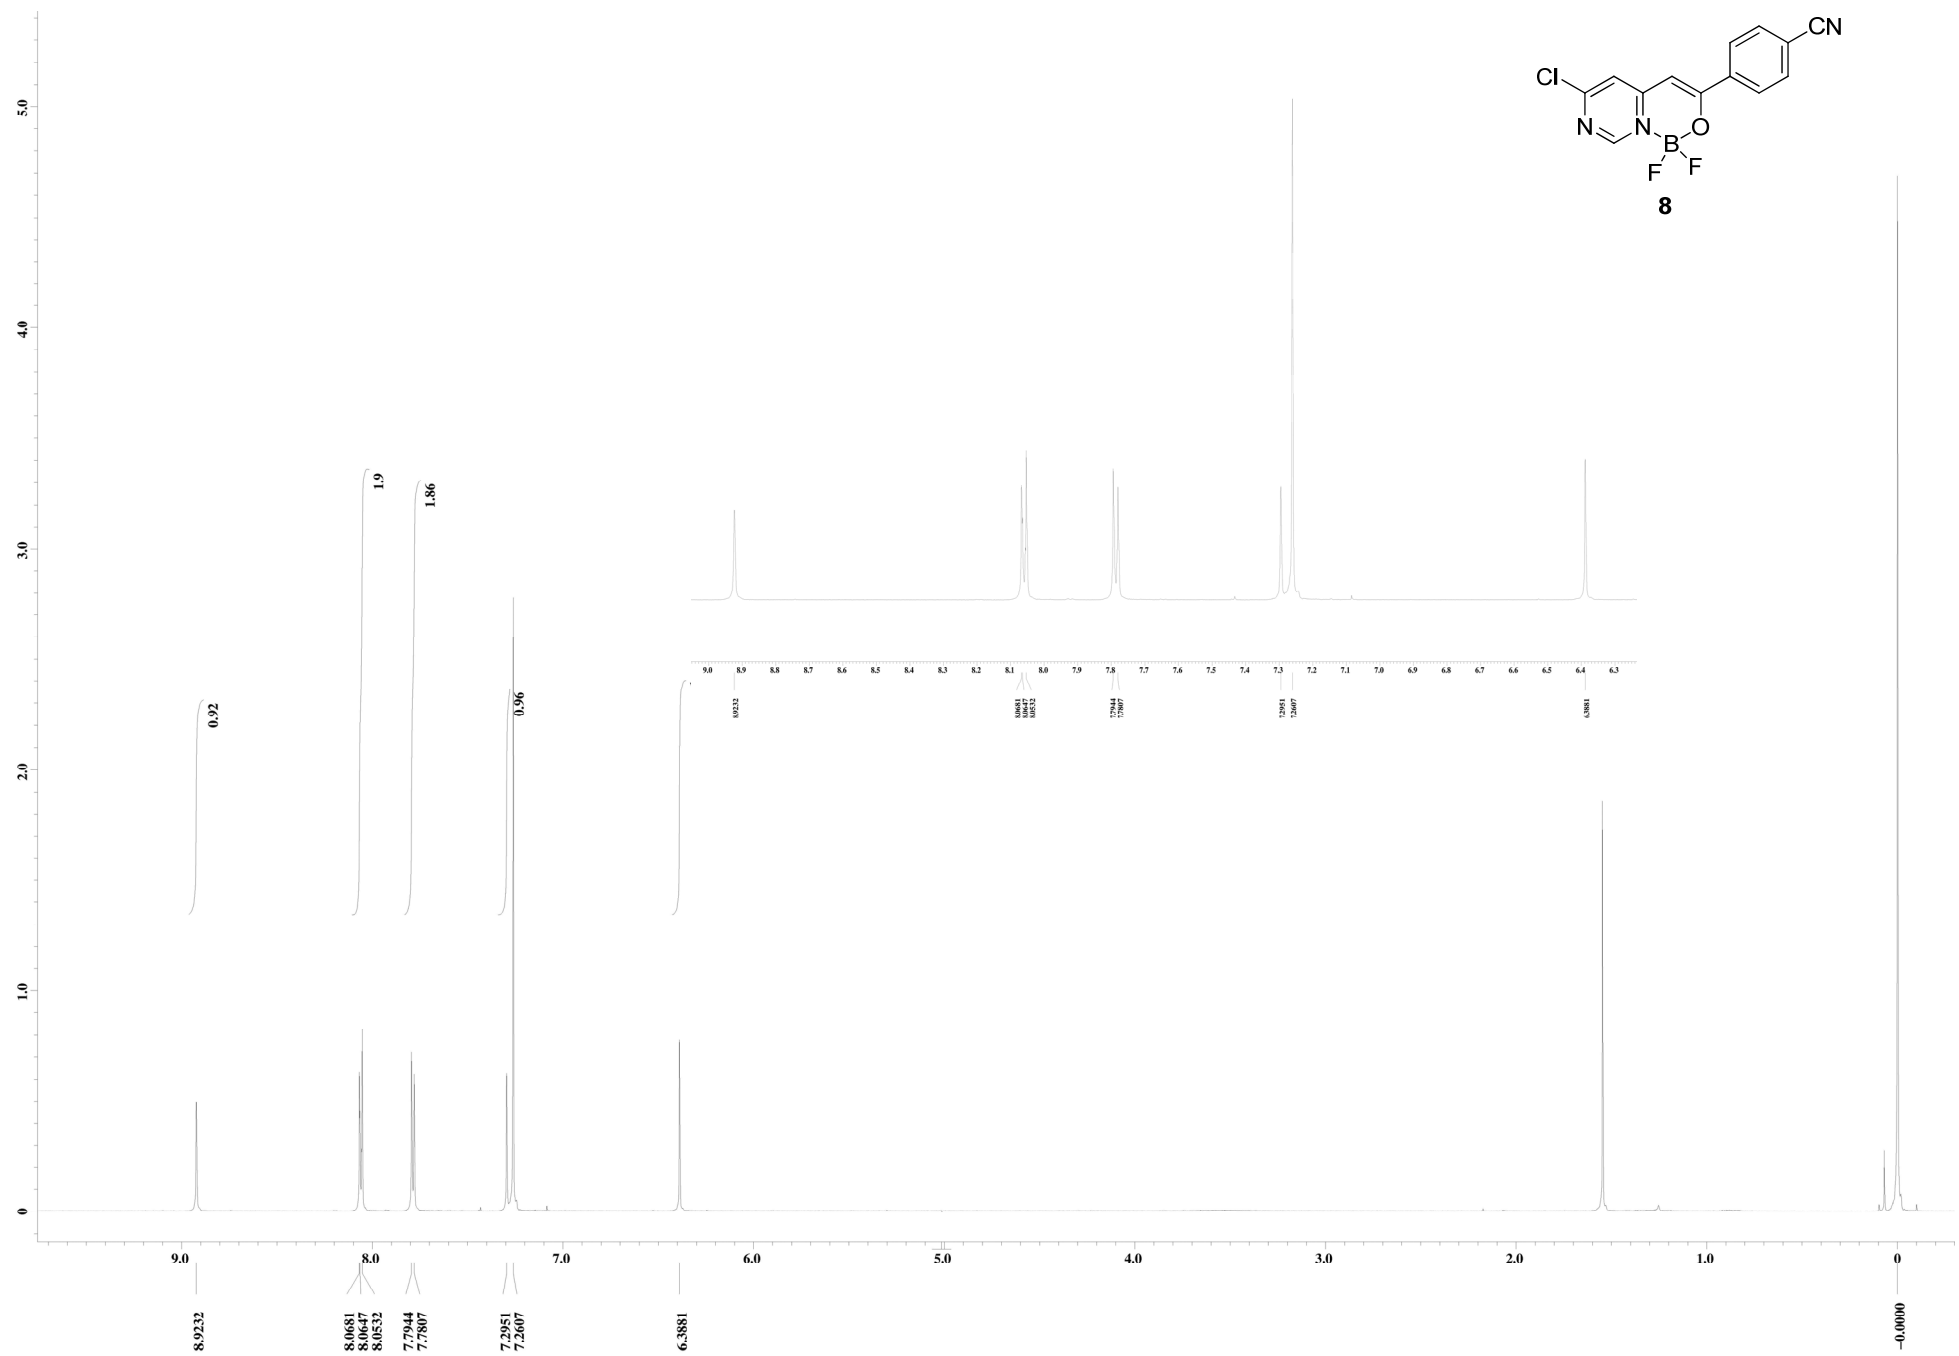

Figure S17. <sup>1</sup>H NMR spectra of **8**.

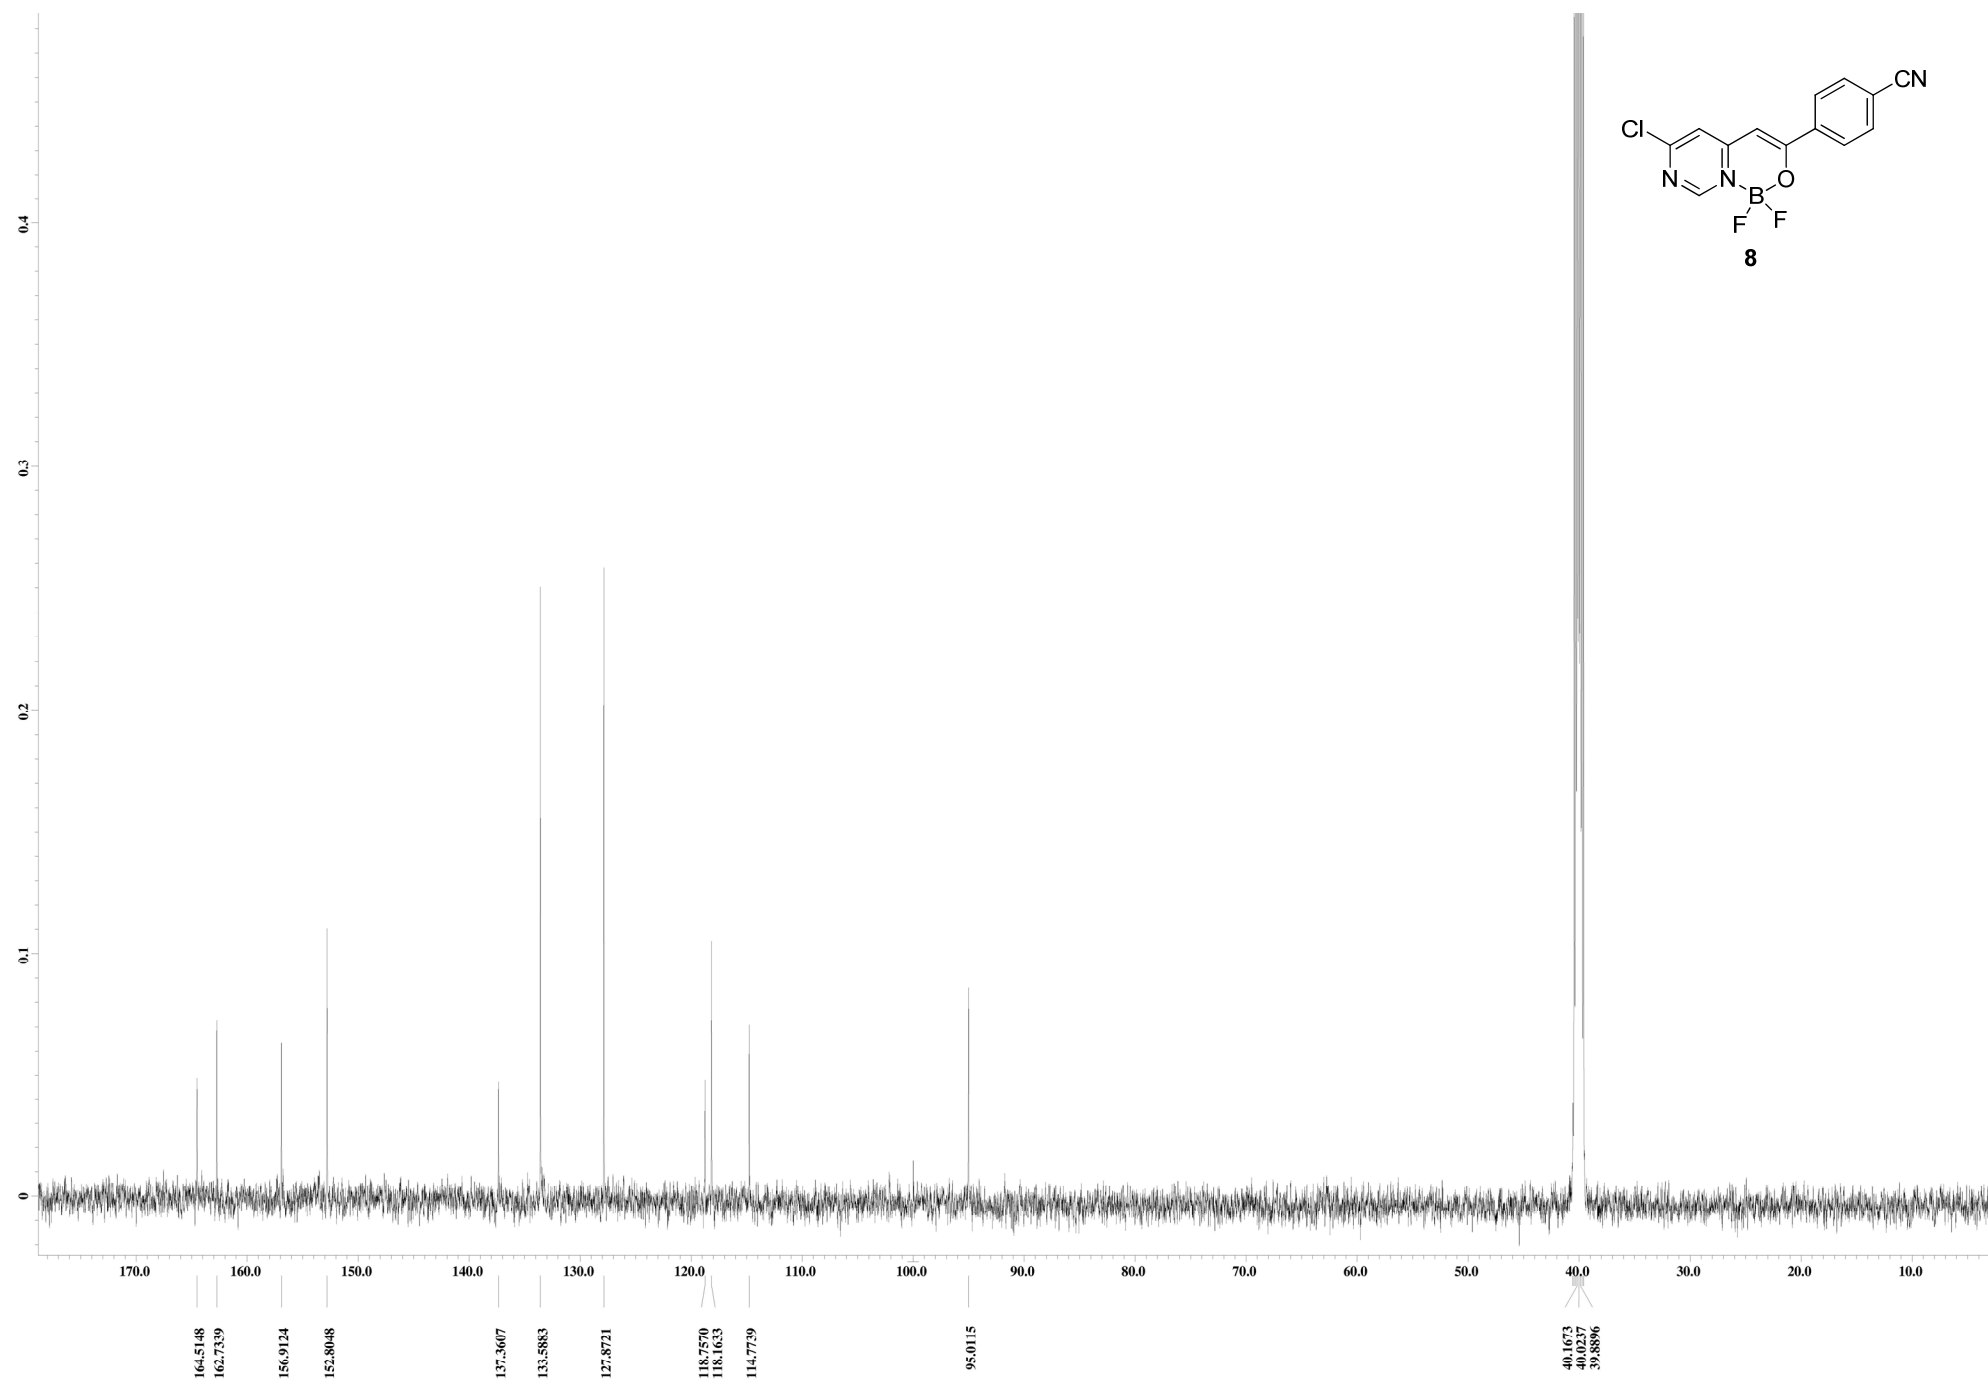

Figure S18.  $^{13}\text{C}$  NMR spectra of **8**.



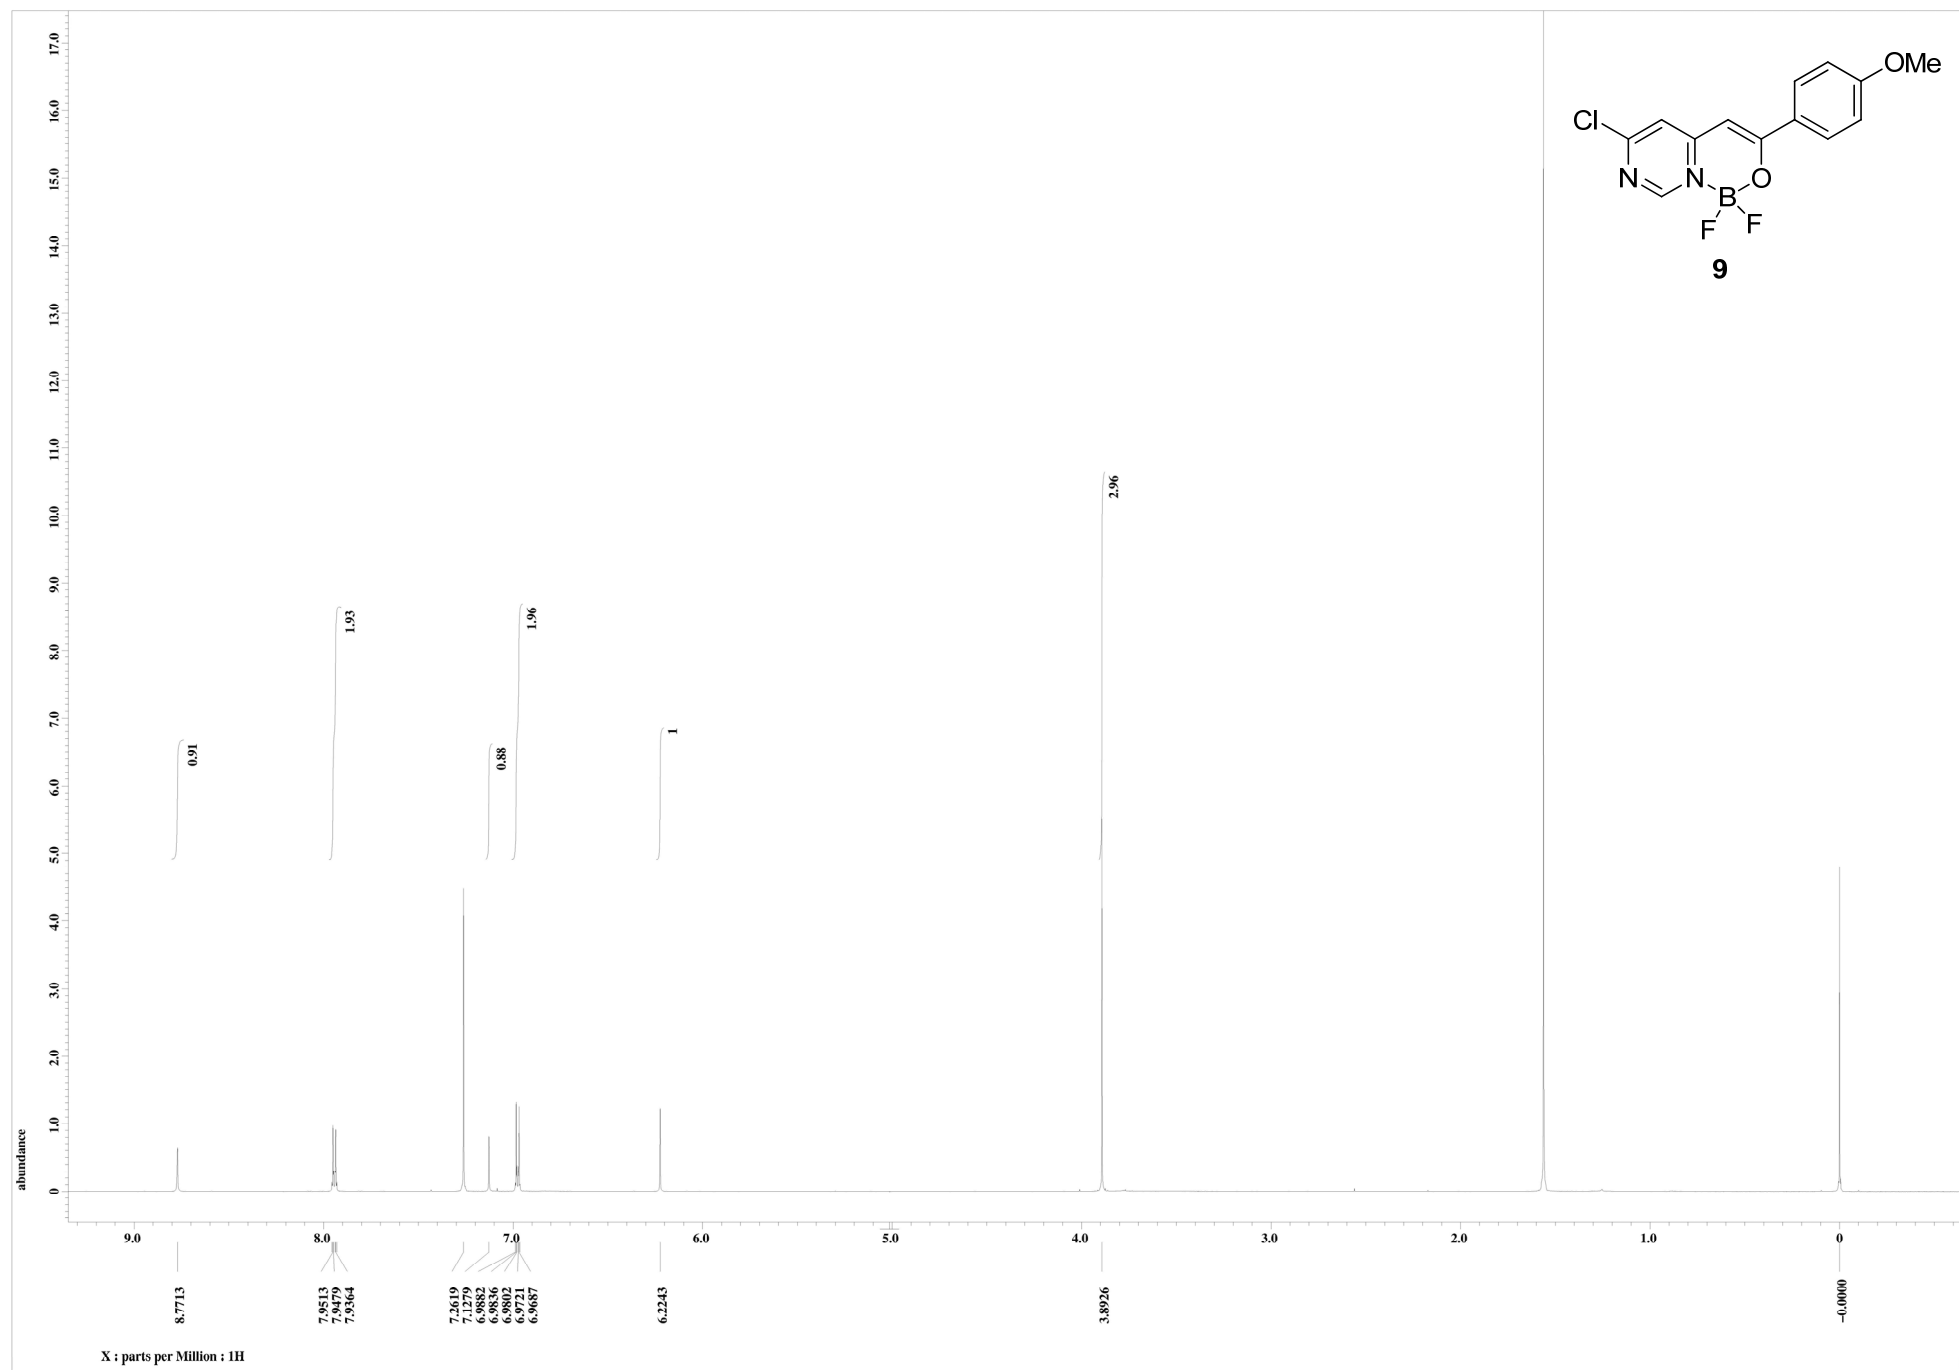

Figure S19. <sup>1</sup>H NMR spectra of **9**.

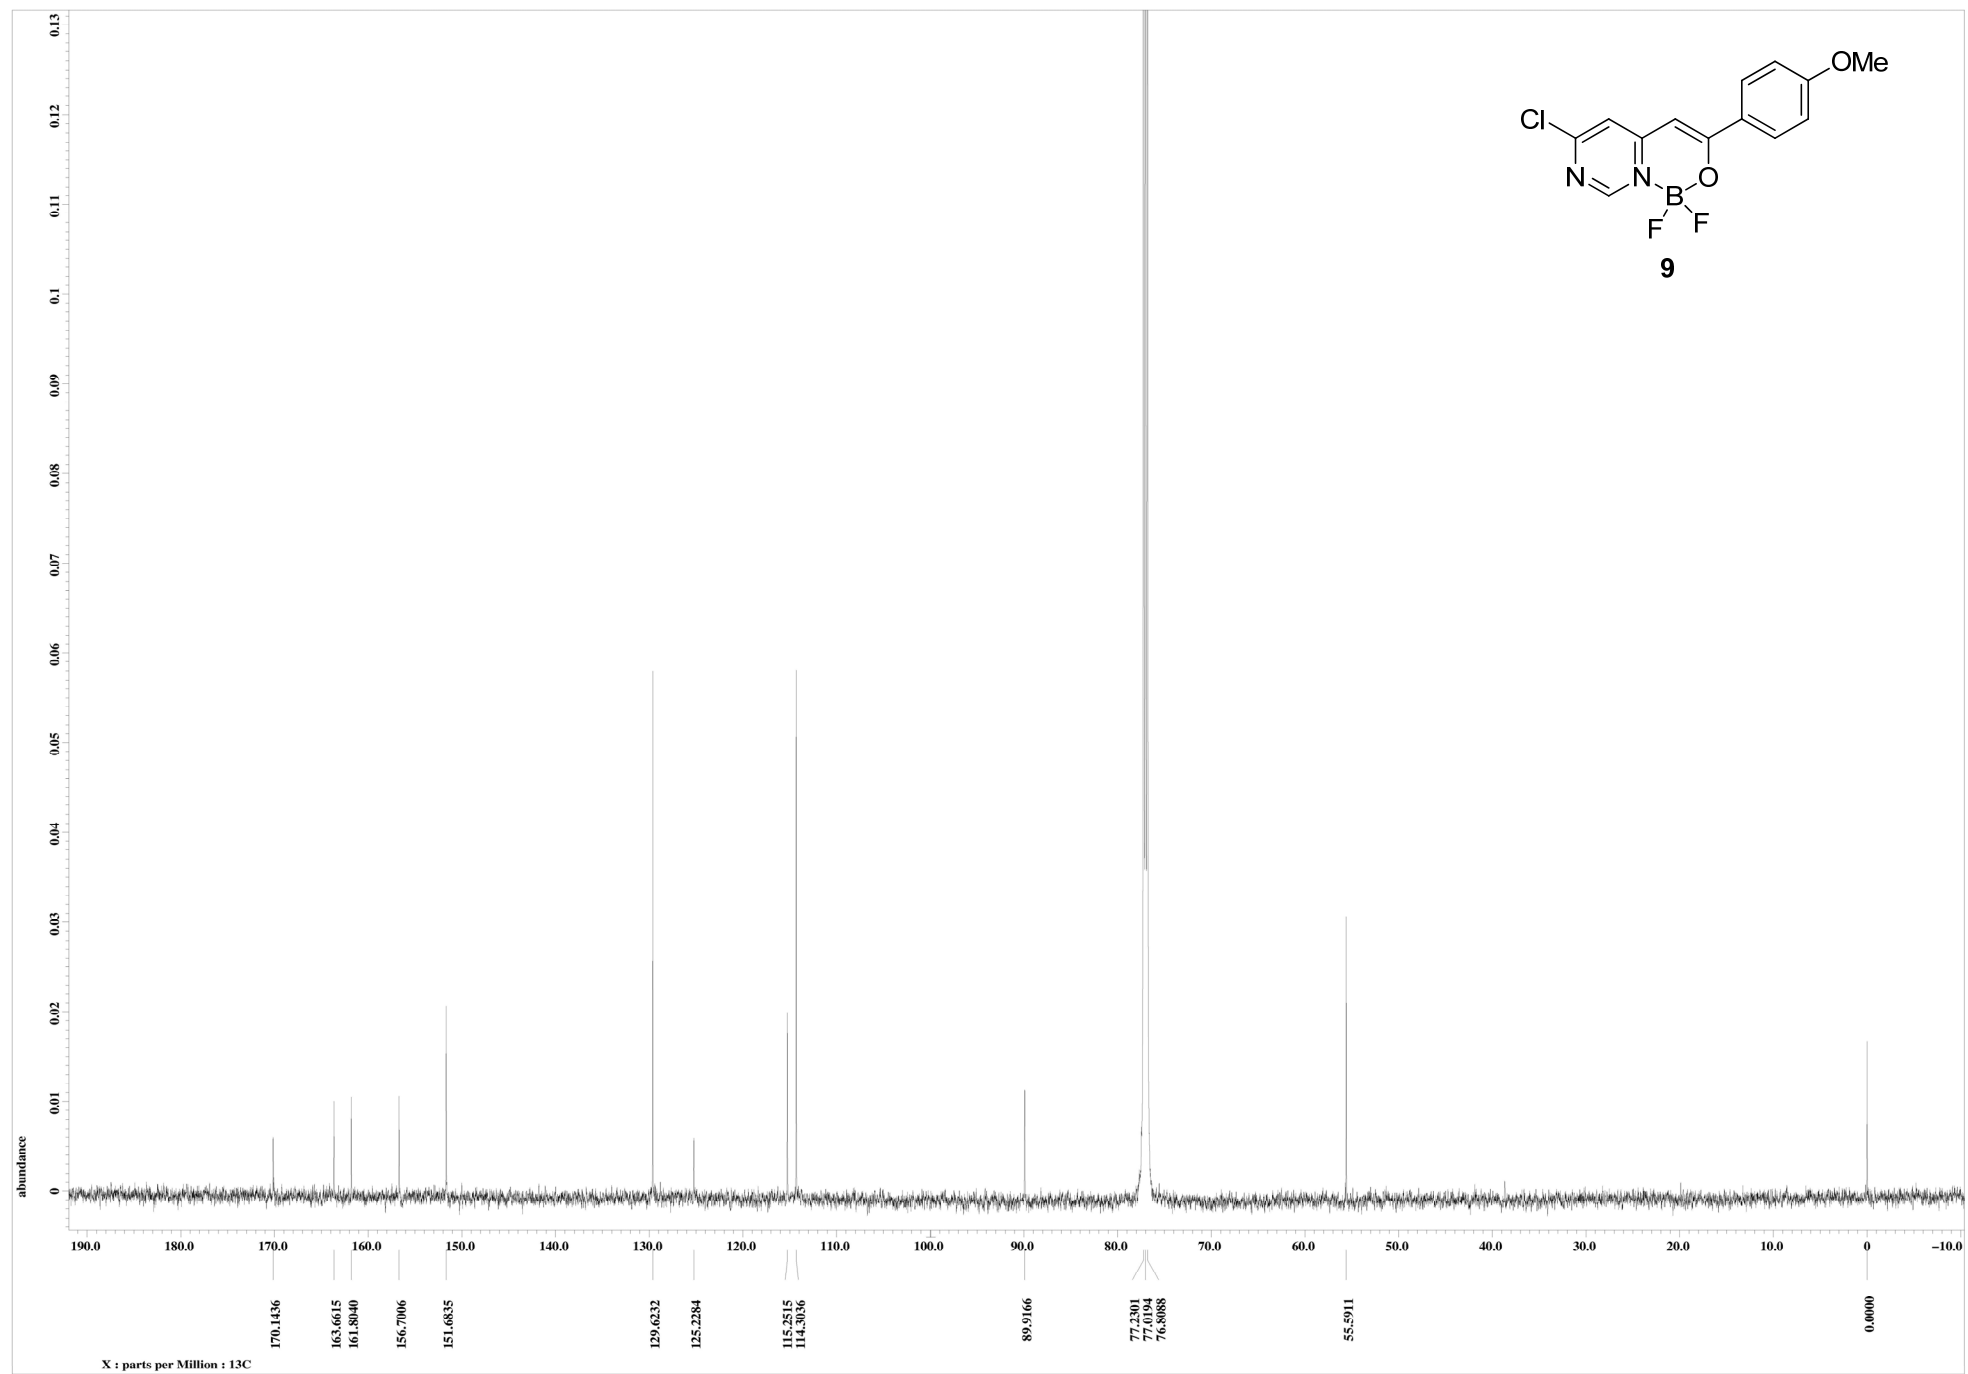

Figure S20. <sup>13</sup>C NMR spectra of **9**.

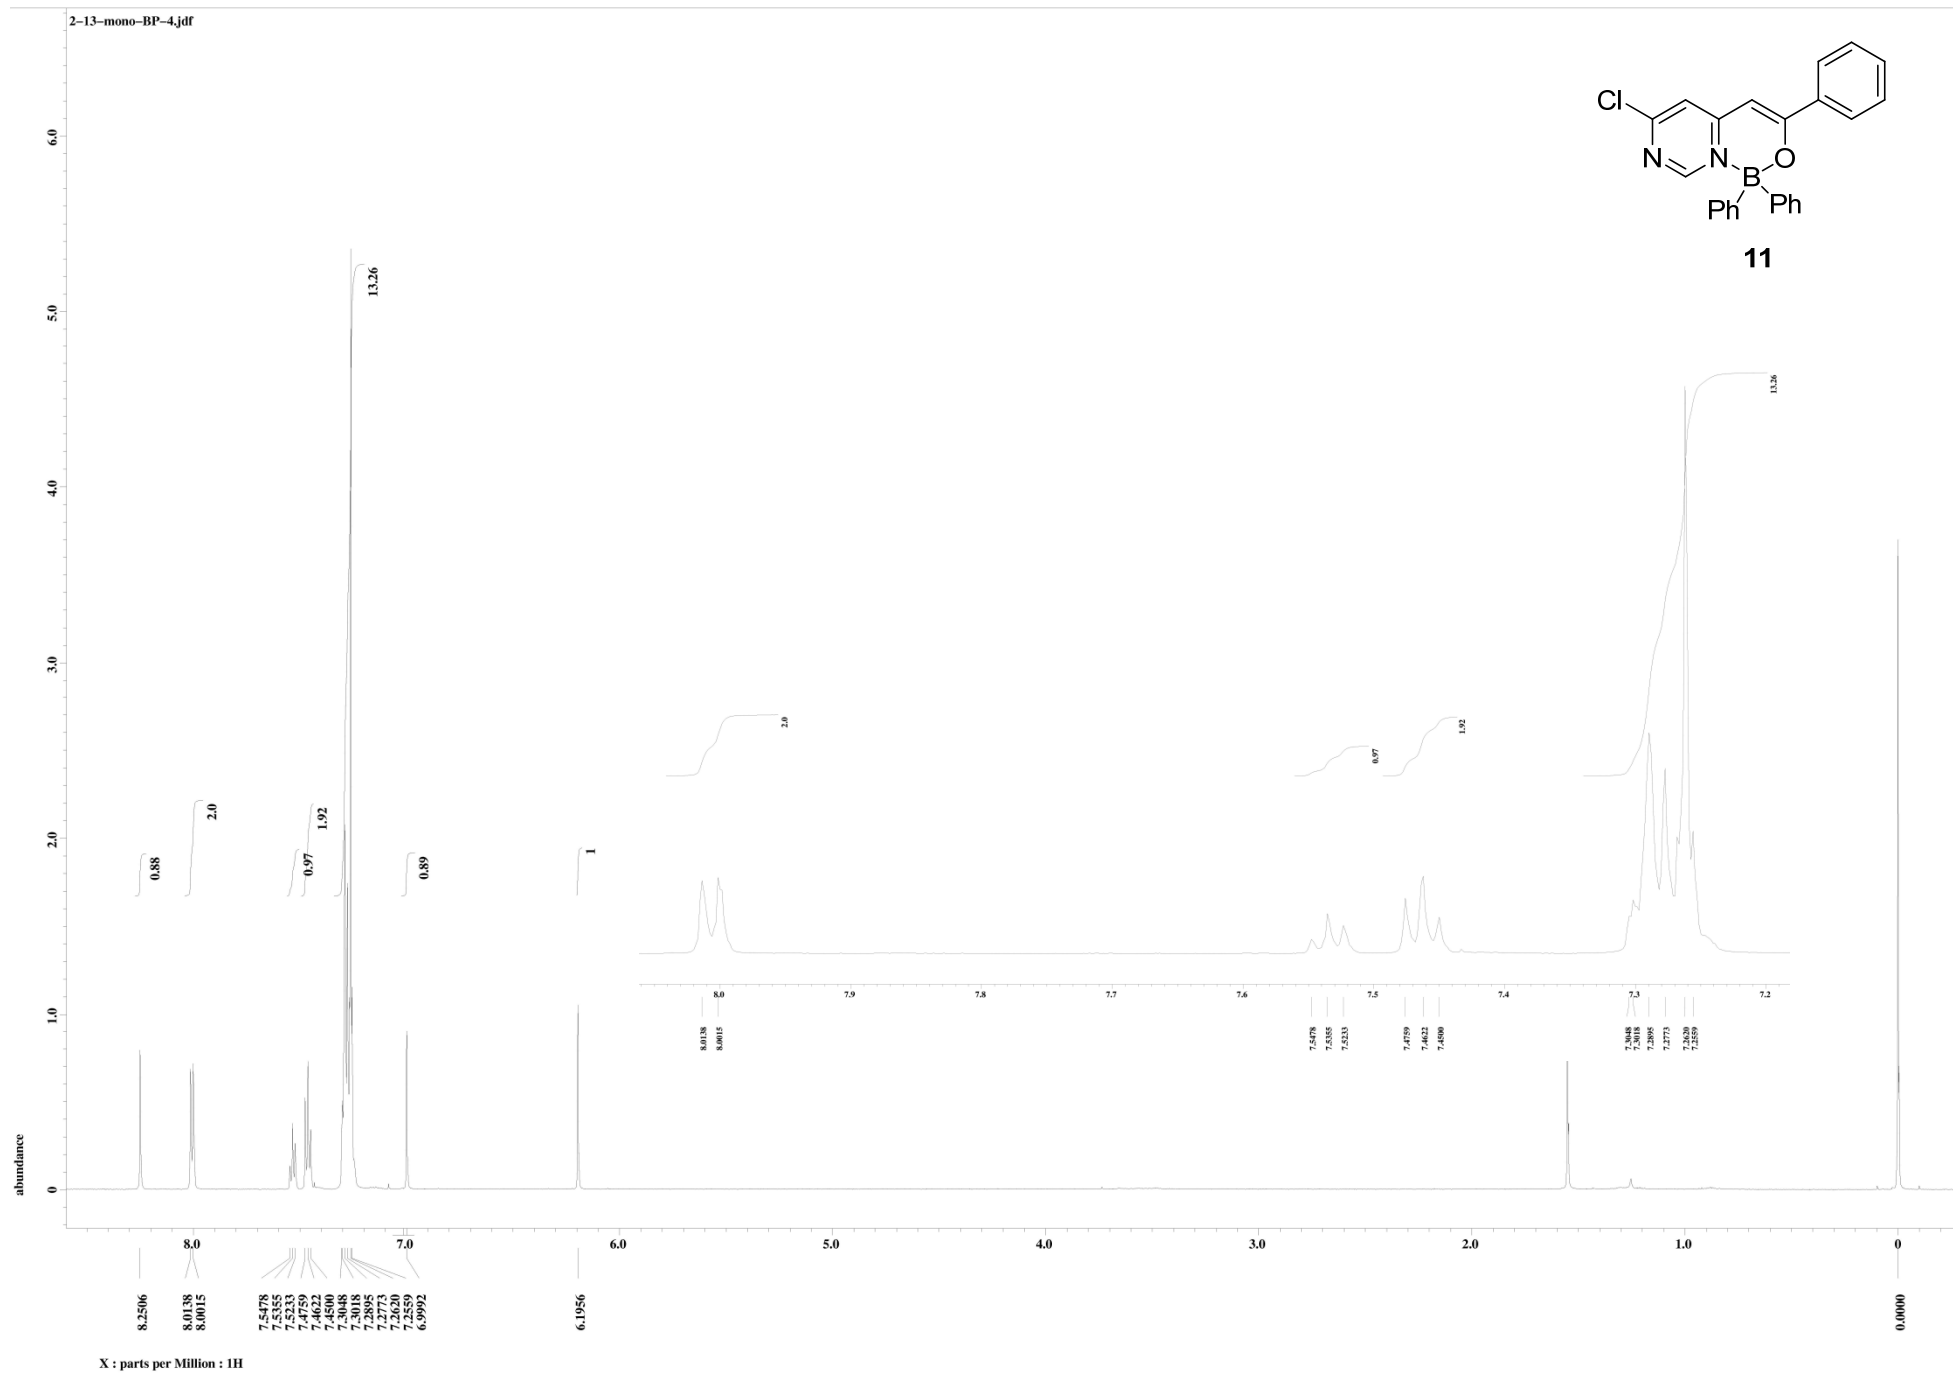

Figure S21. <sup>1</sup>H NMR spectra of **11**.

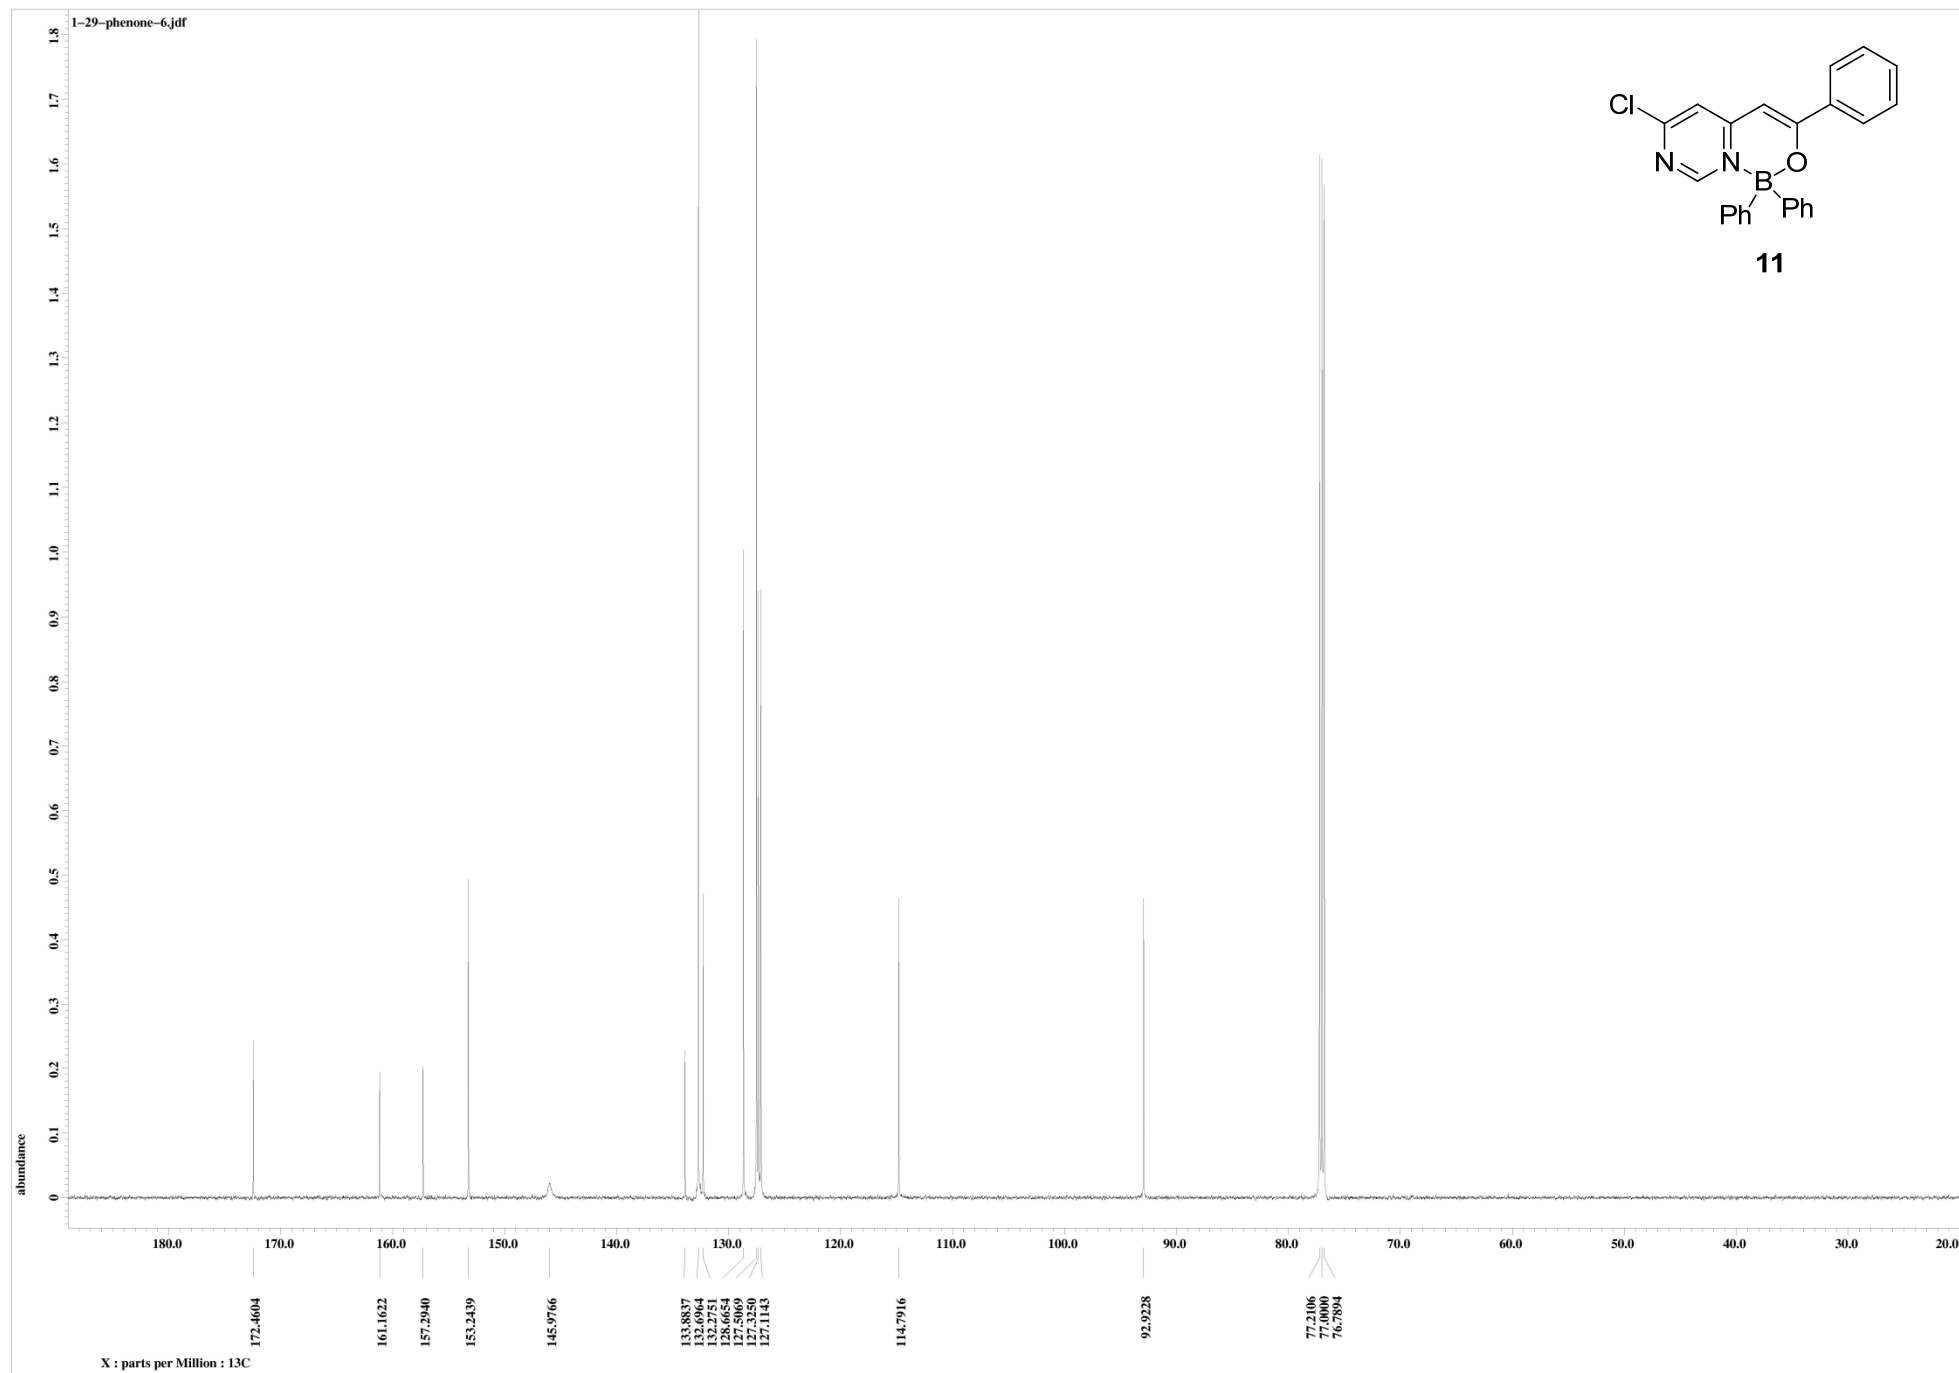

Figure S22.  $^{13}\text{C}$  NMR spectra of 11.

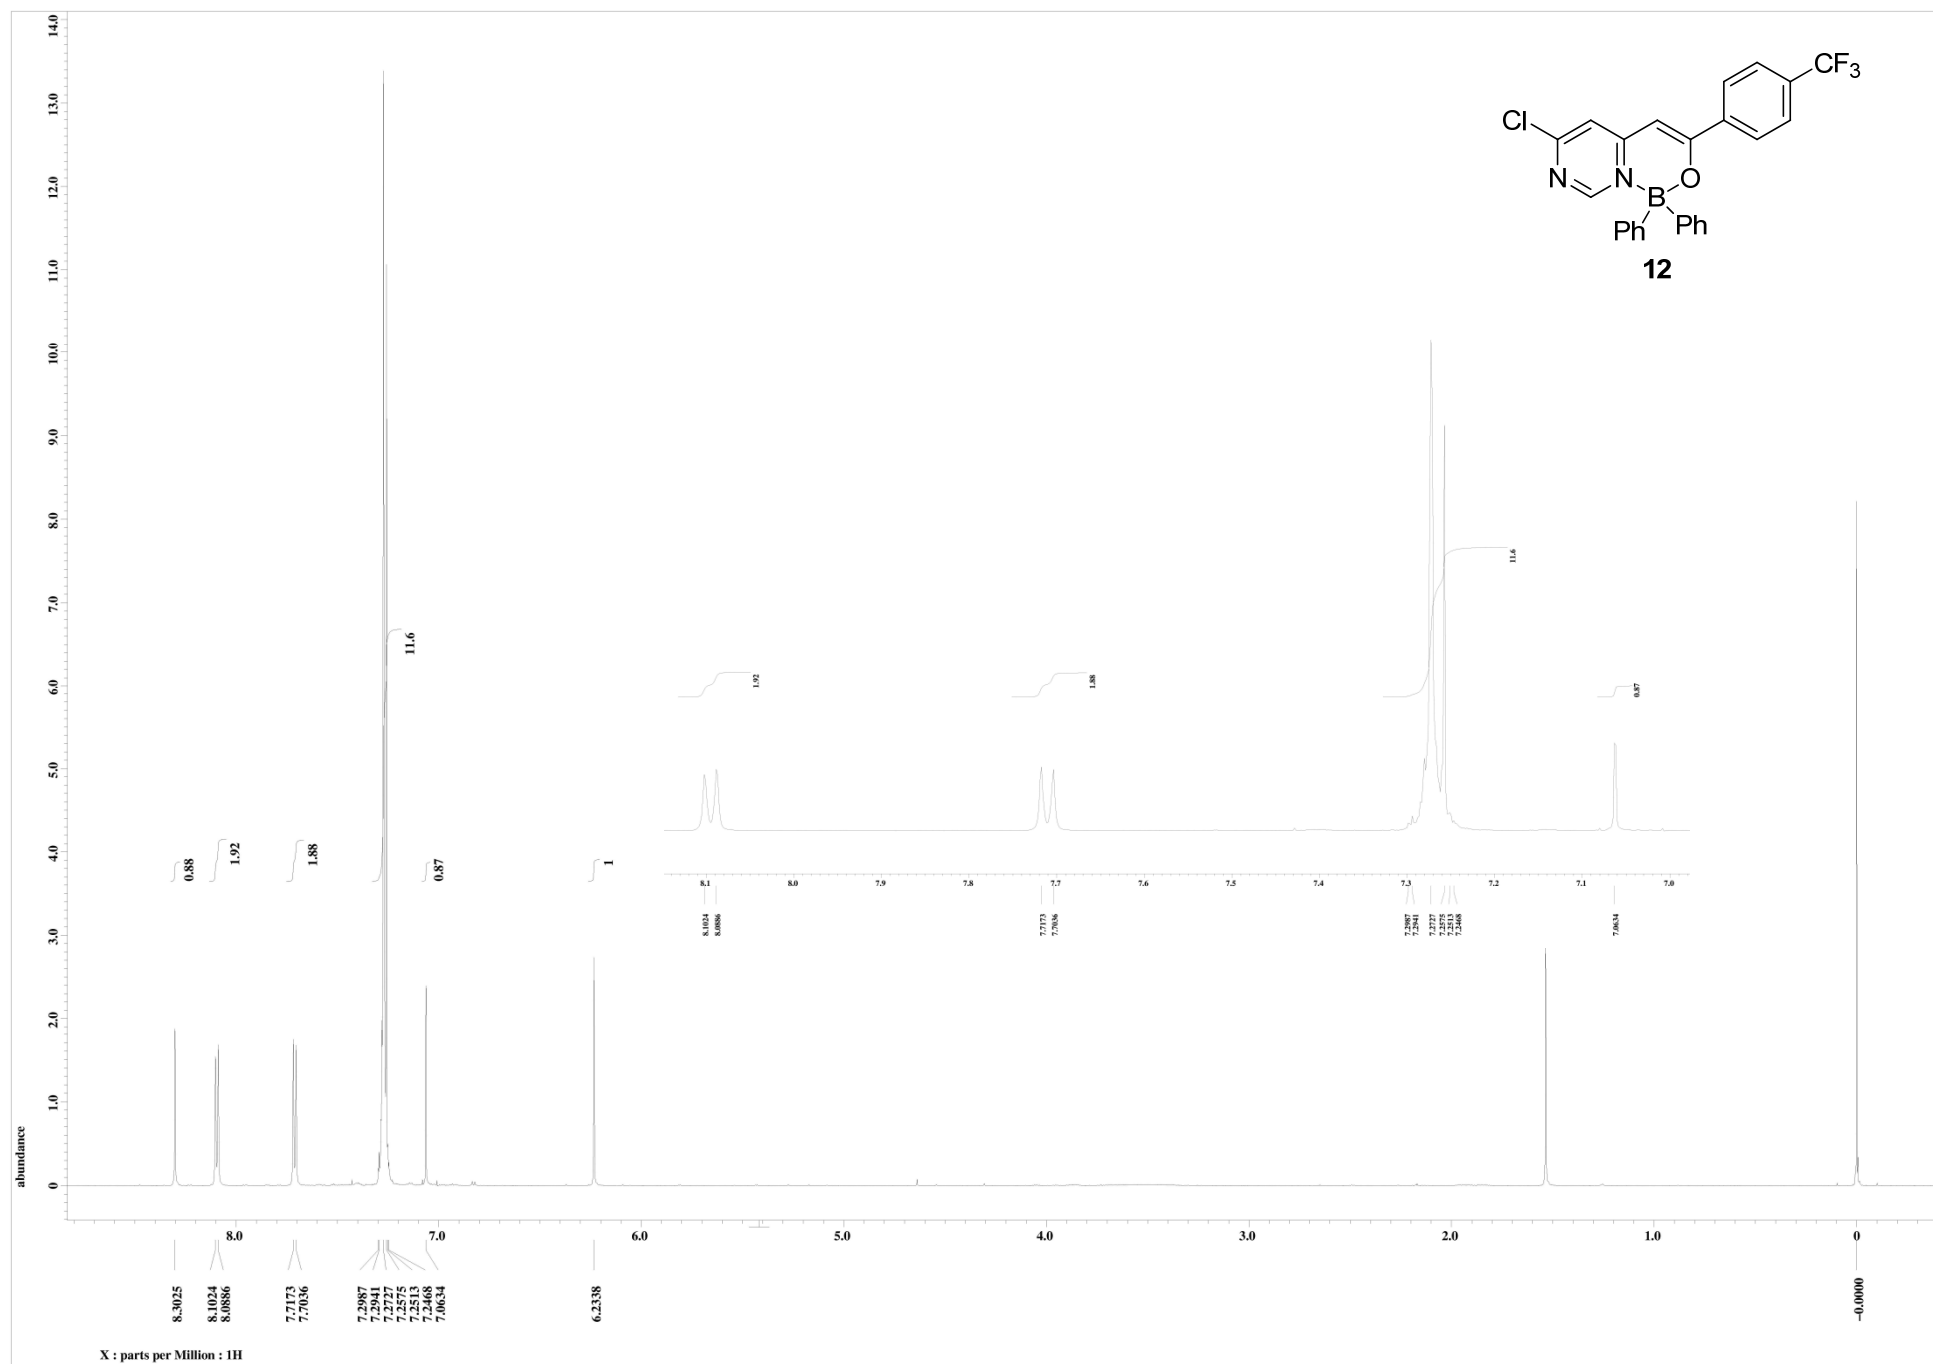

Figure S23. <sup>1</sup>H NMR spectra of 12.

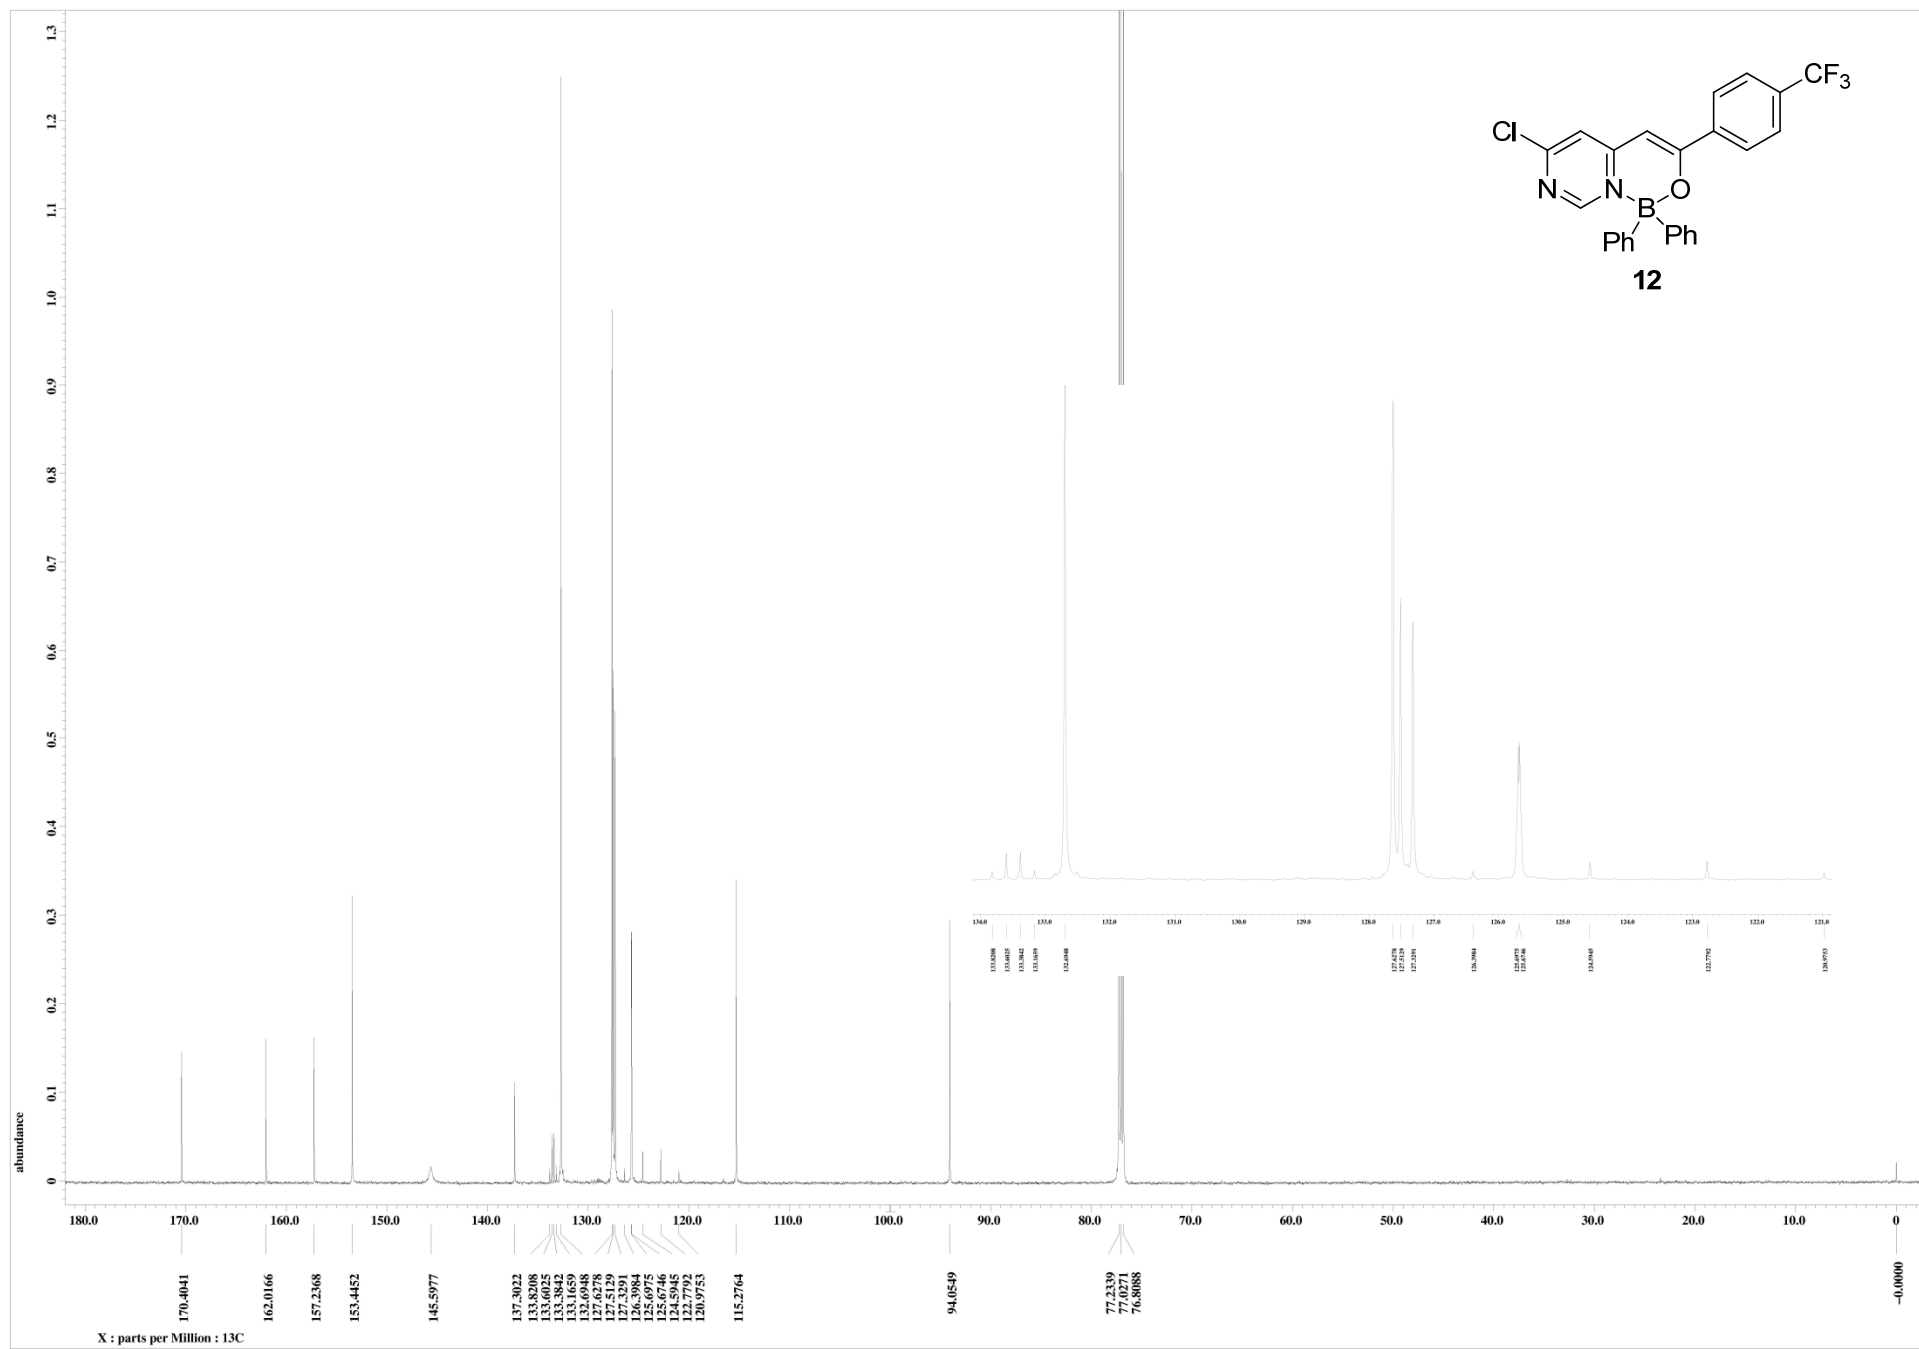

Figure S24. <sup>13</sup>C NMR spectra of **12**.

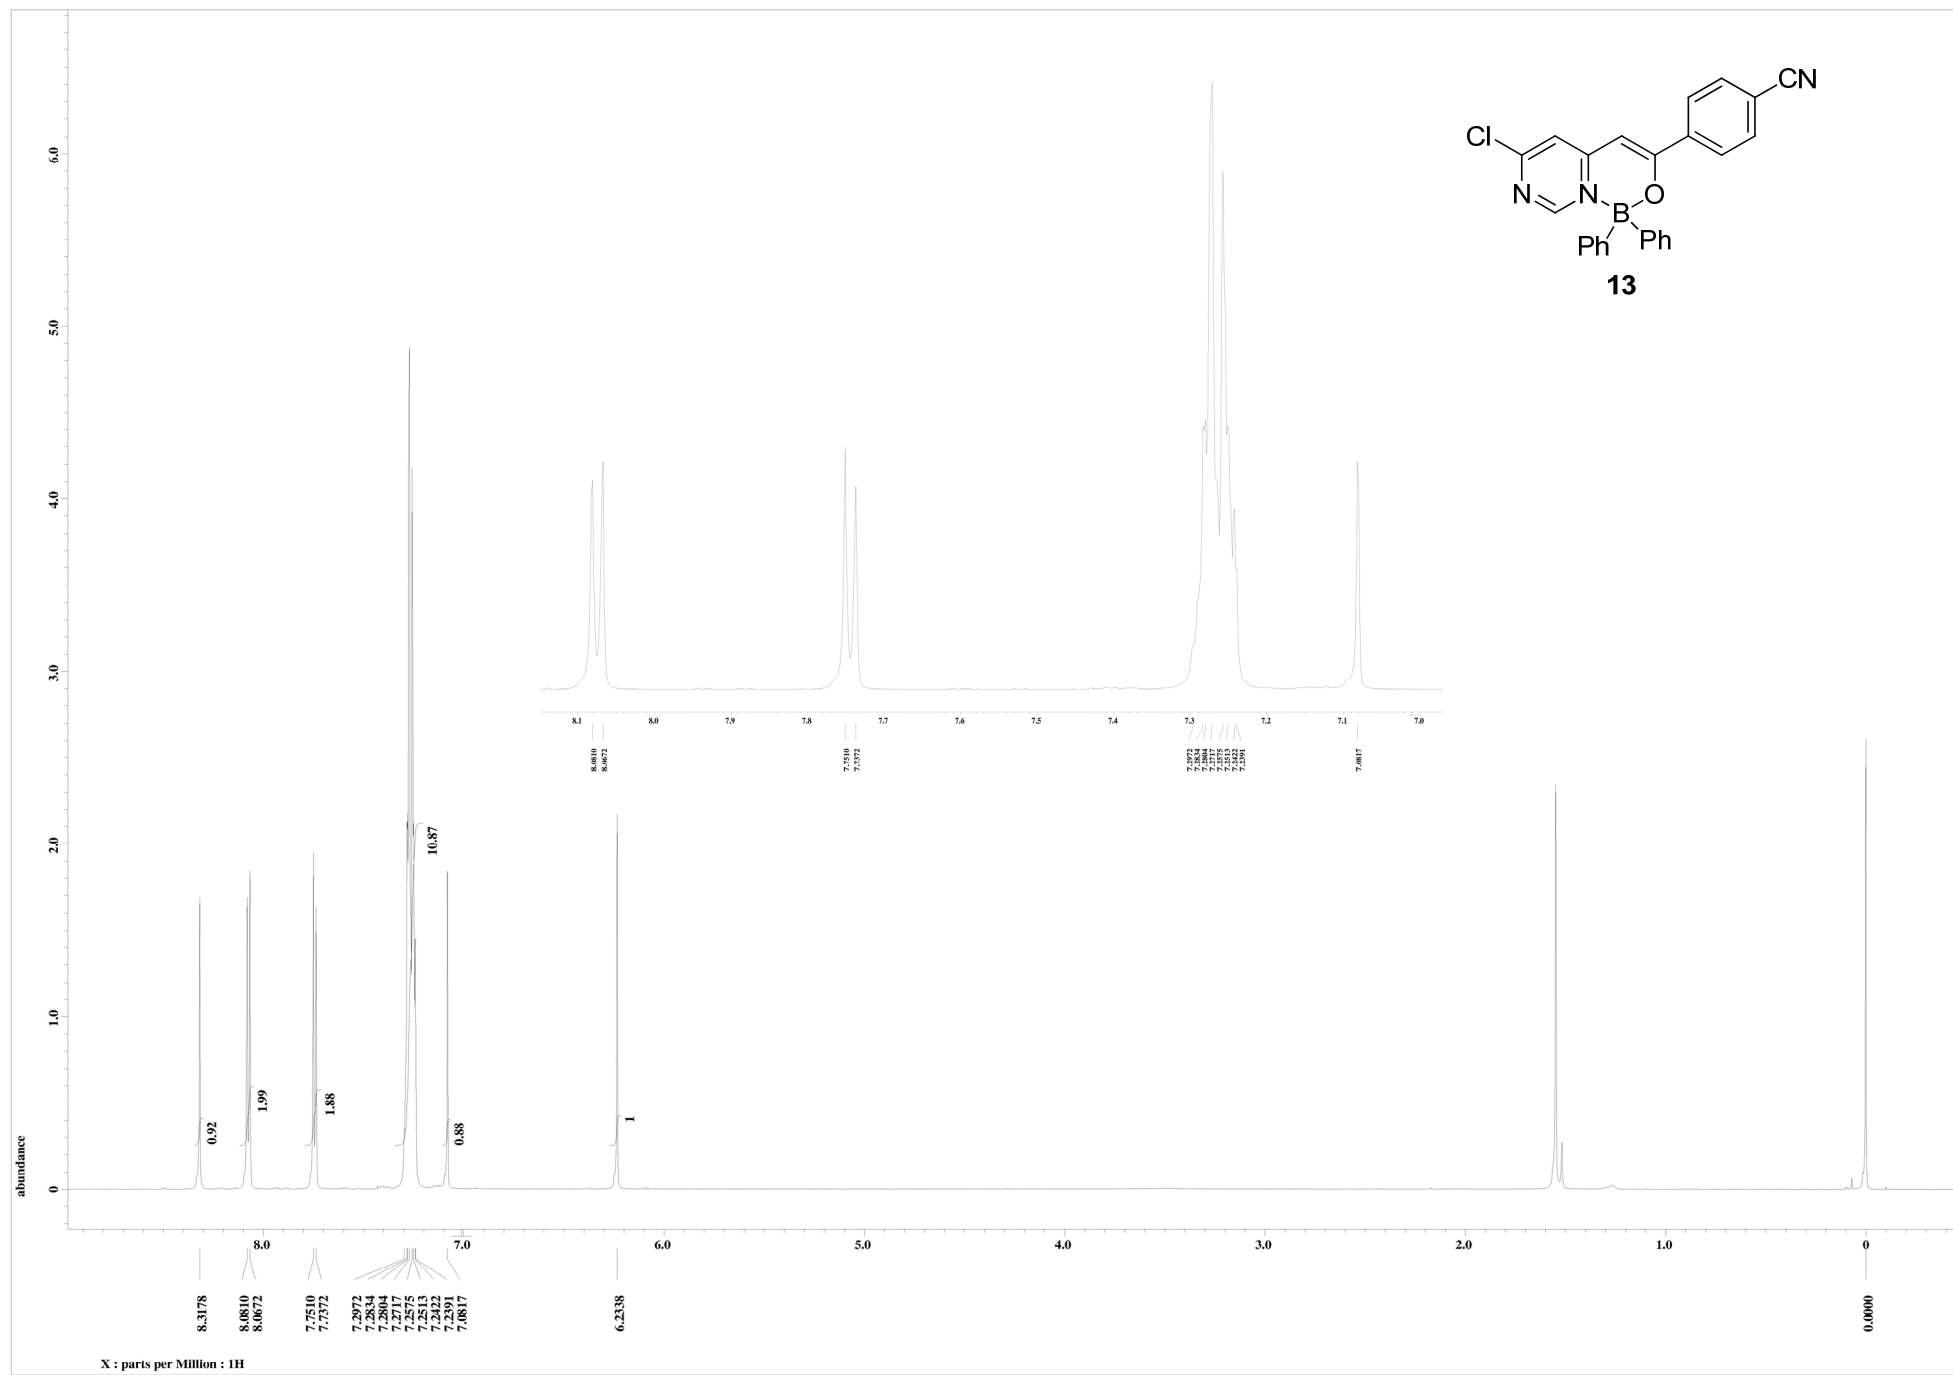

Figure S25. <sup>1</sup>H NMR spectra of **13**.

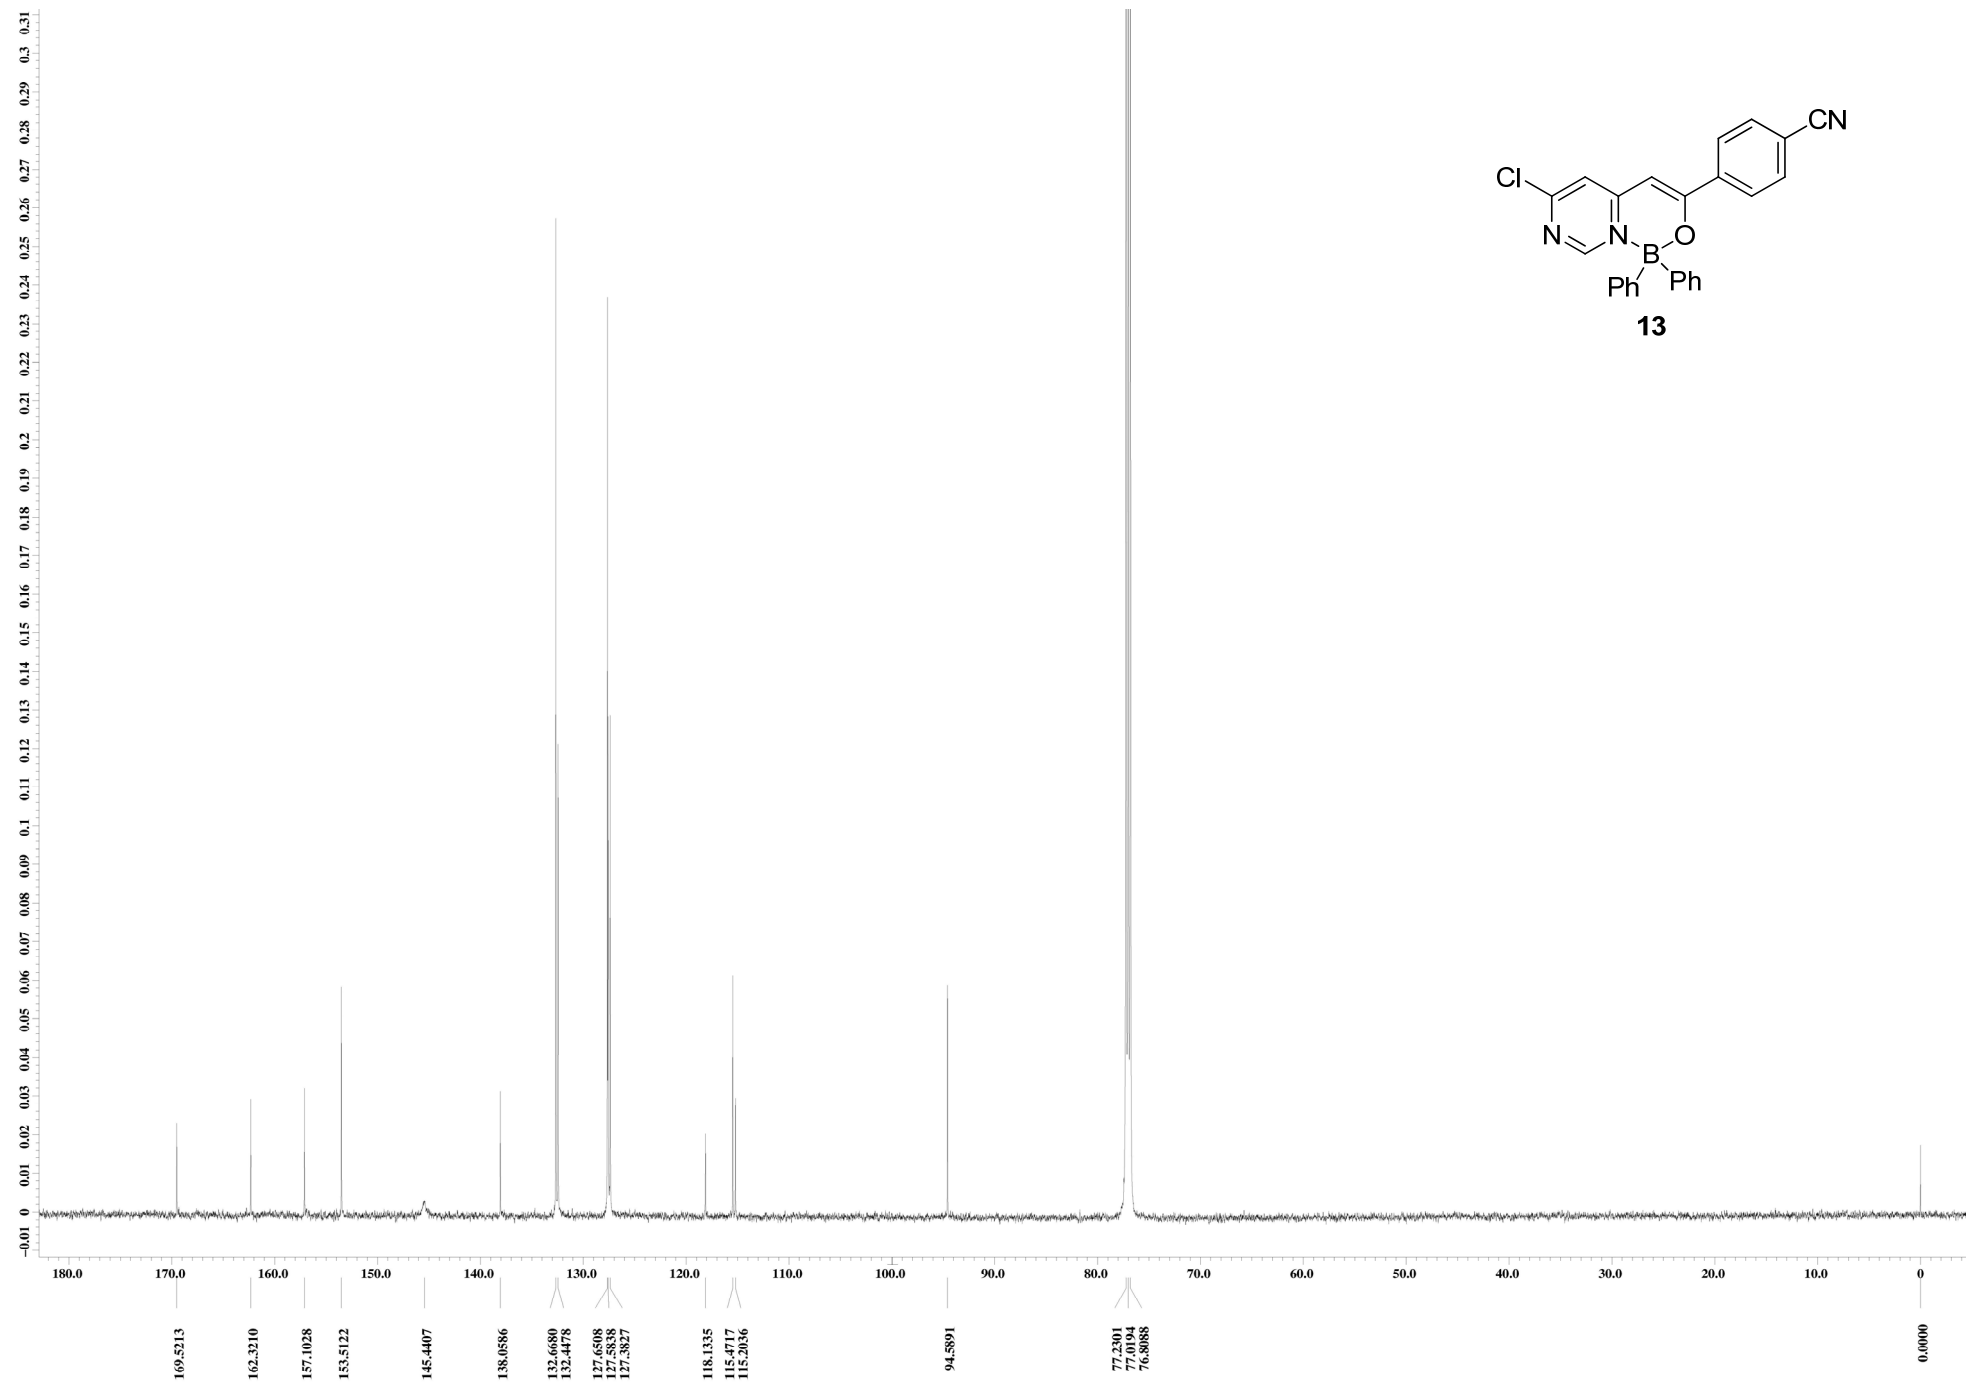

Figure S26.  $^{13}\text{C}$  NMR spectra of **13**.



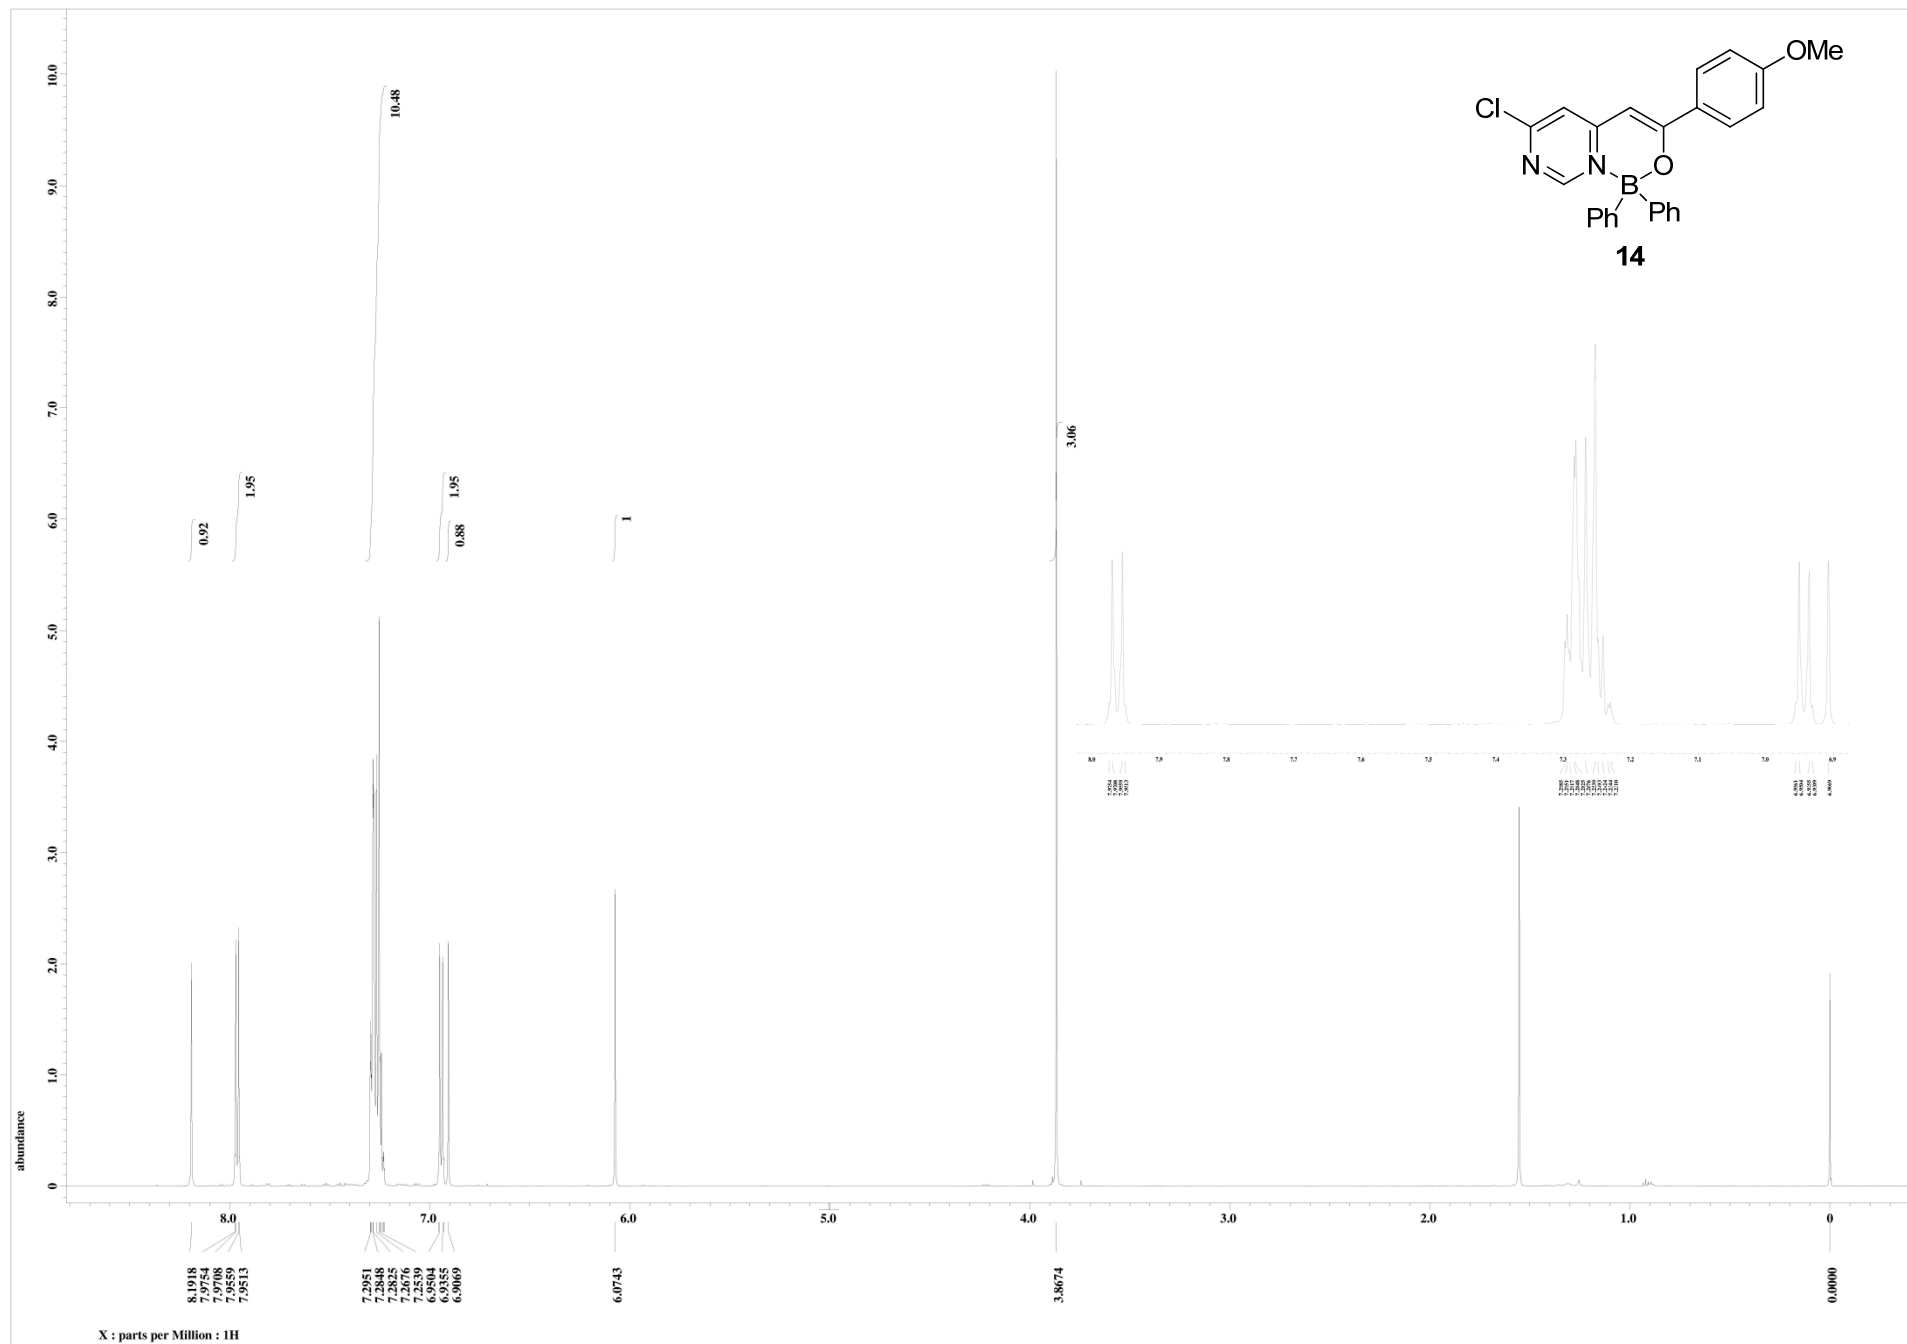

Figure S27. <sup>1</sup>H NMR spectra of **14**.

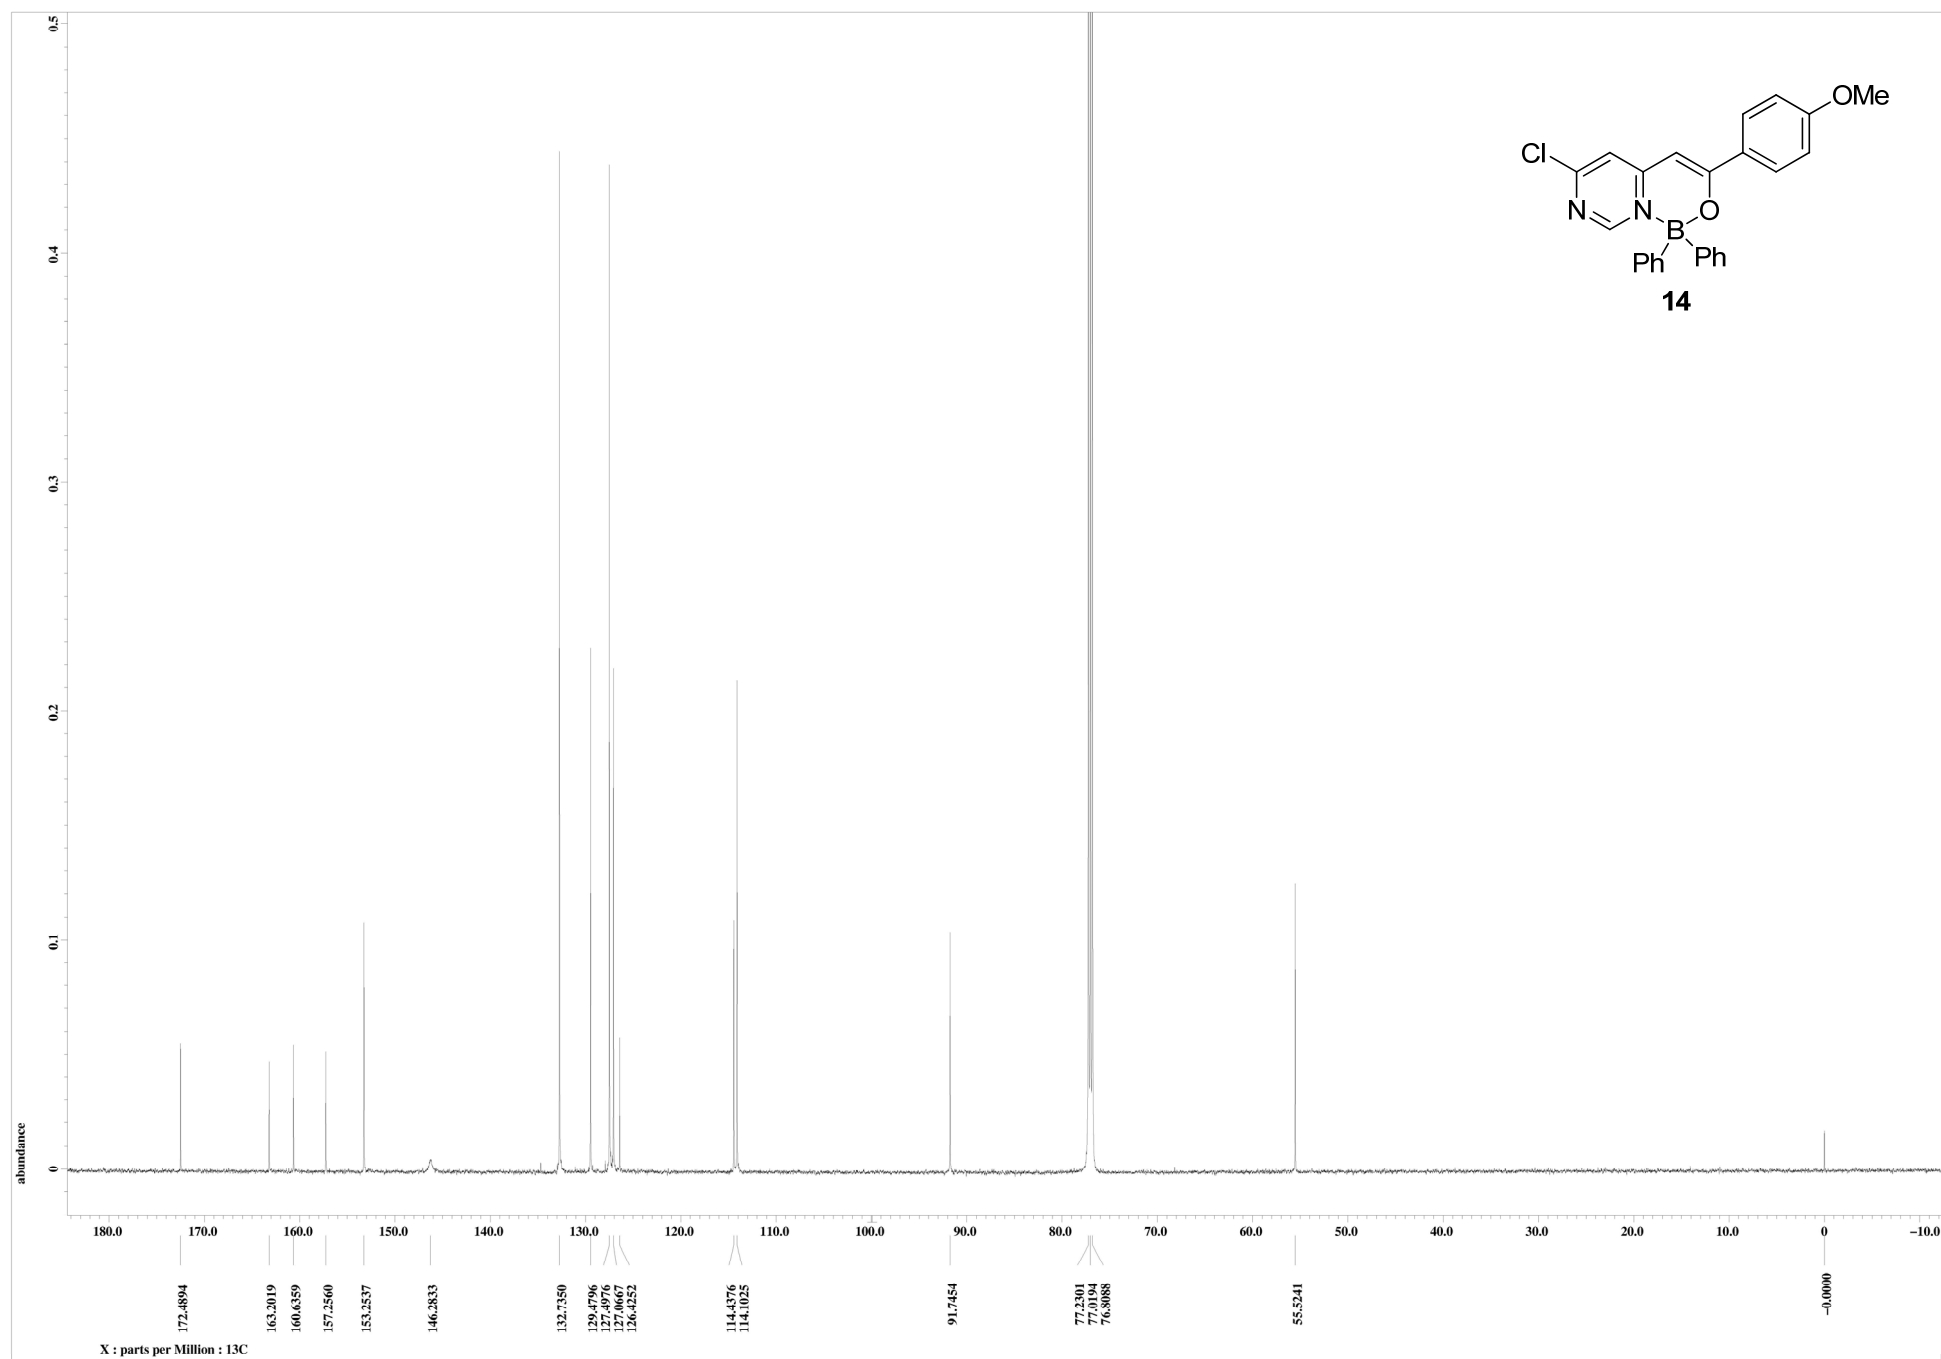

Figure S28.  $^{13}\text{C}$  NMR spectra of **14**.

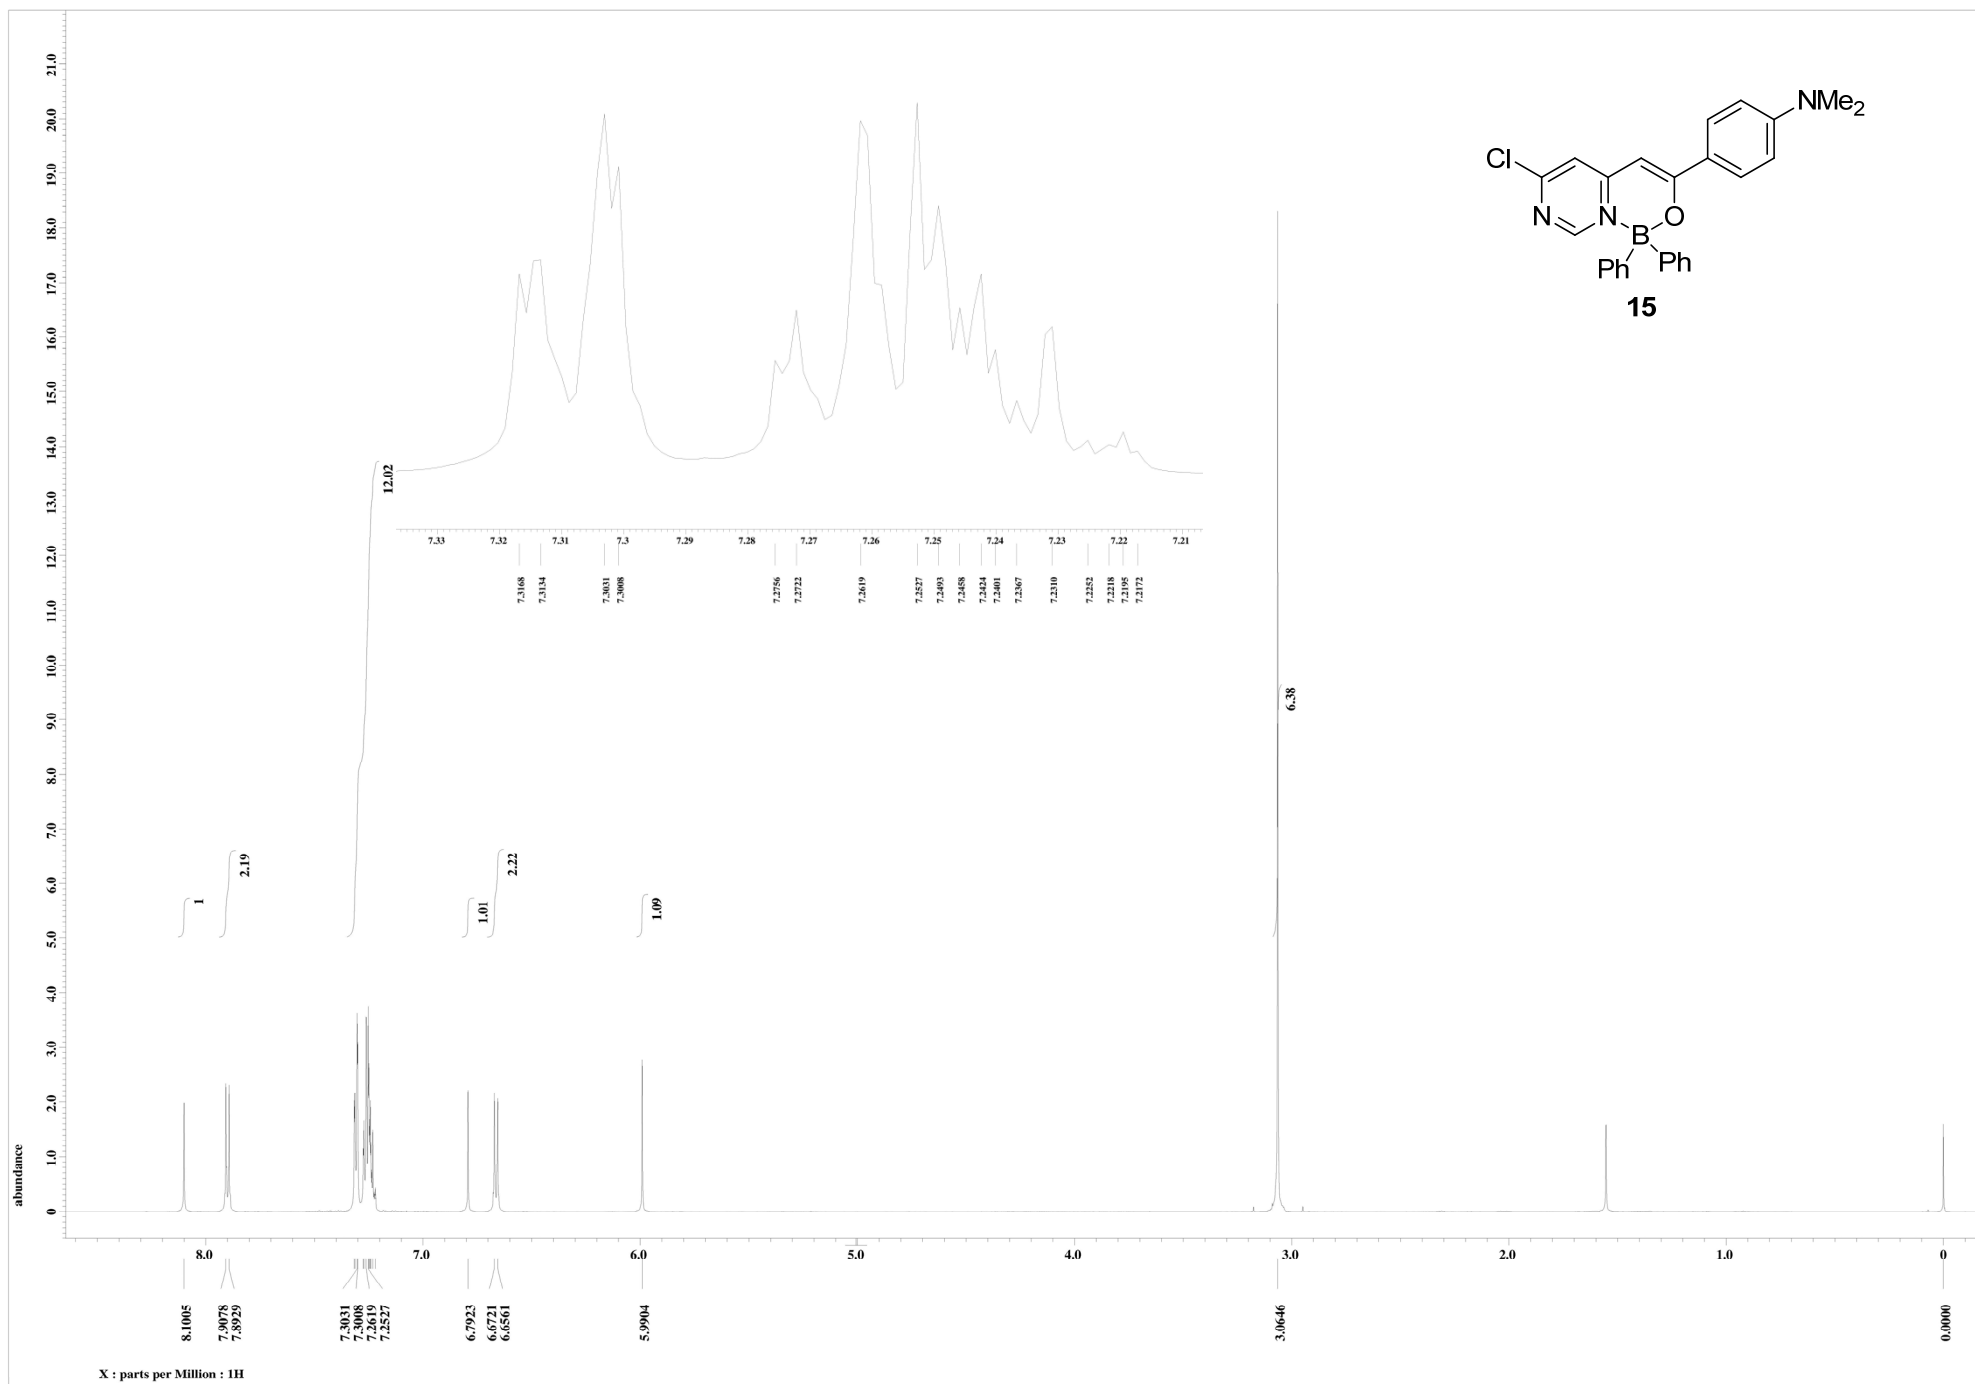

Figure S29. <sup>1</sup>H NMR spectra of 15.

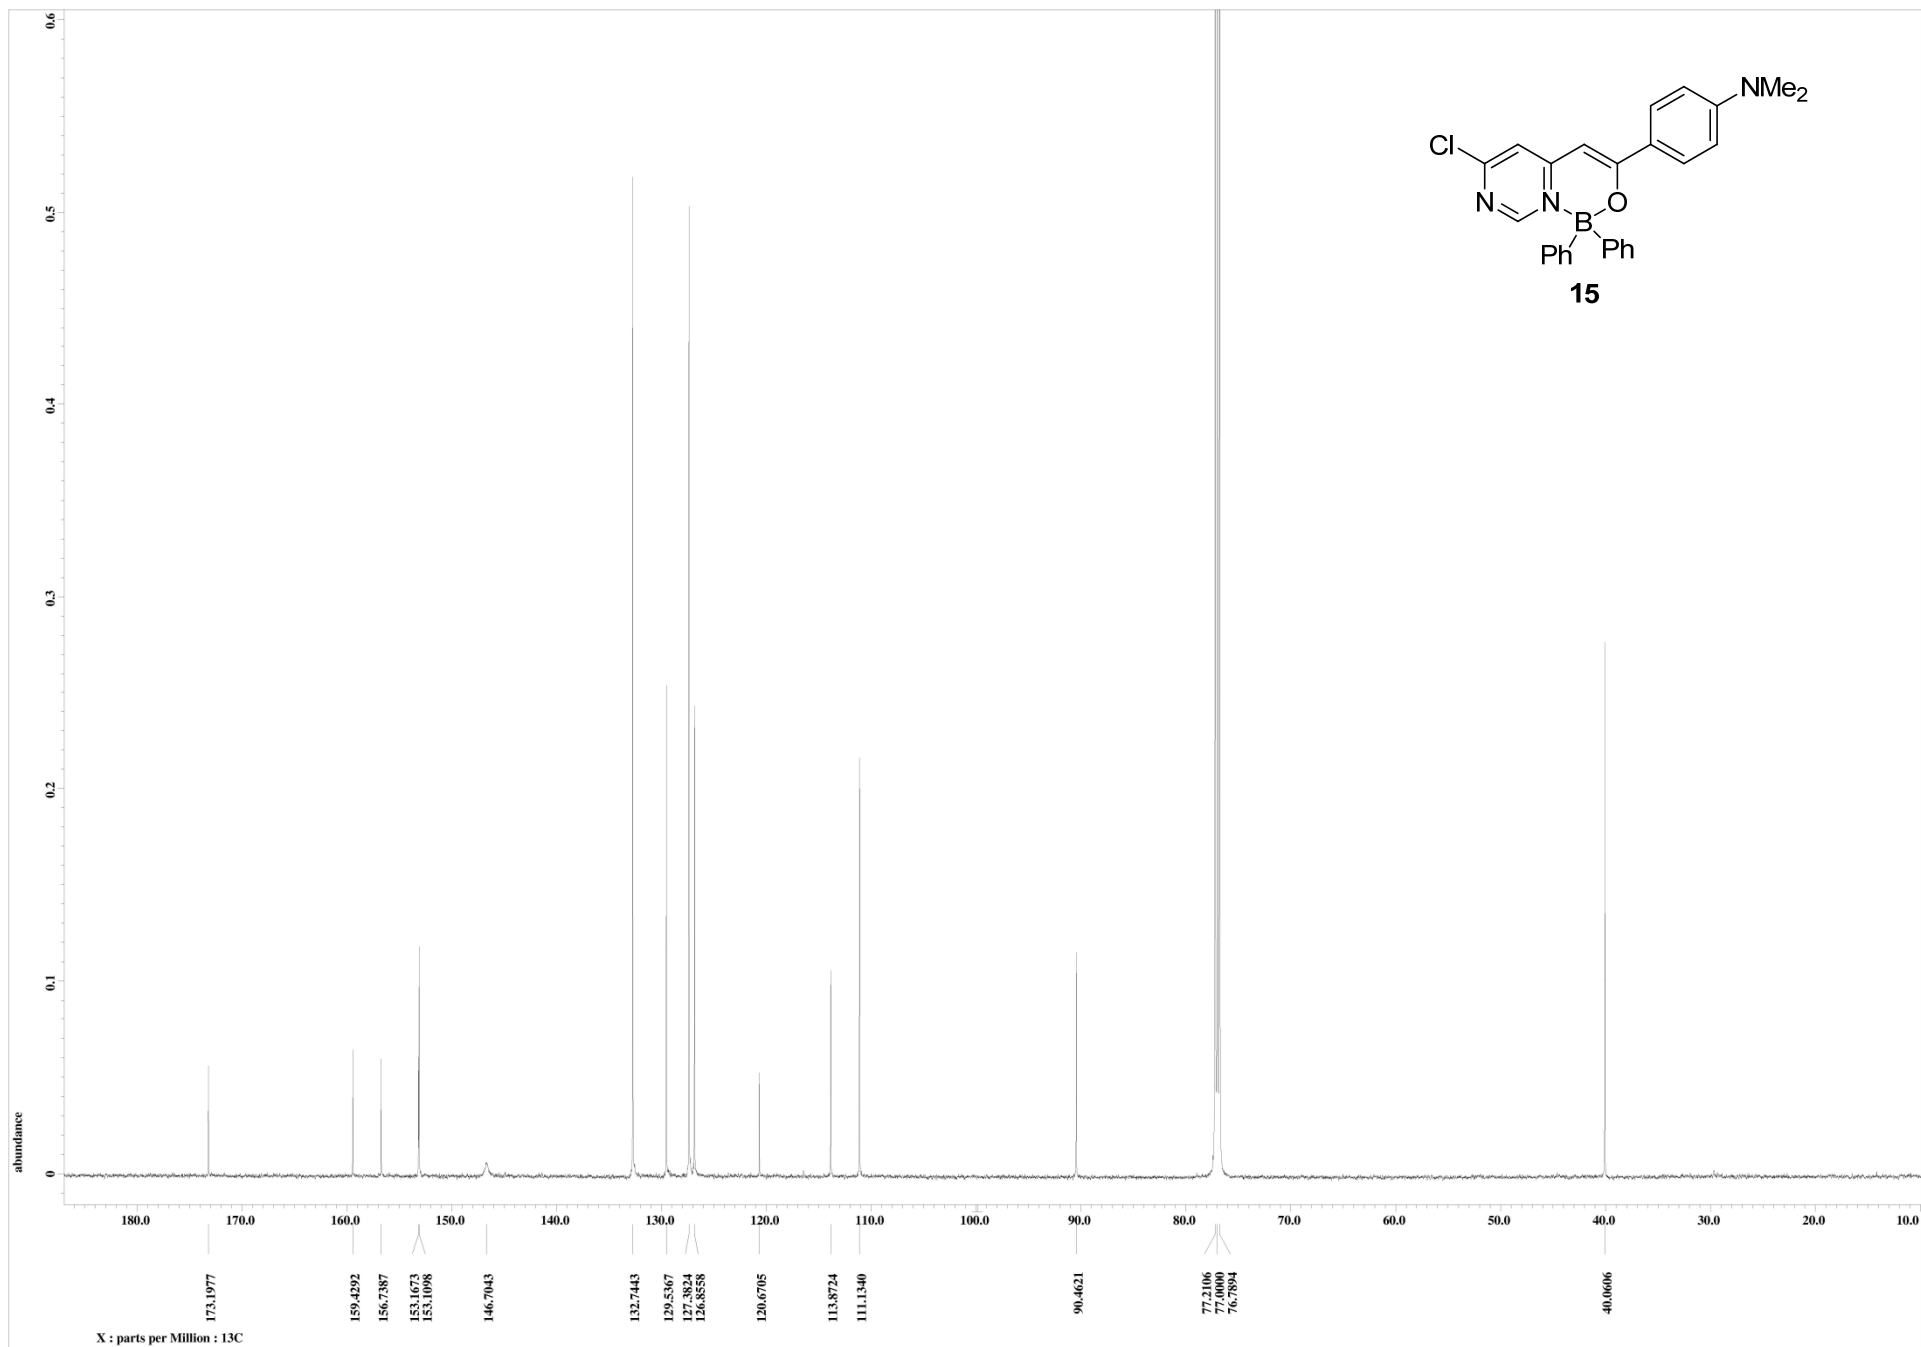

Figure S30. <sup>13</sup>C NMR spectra of **15**.
